# Supplementary material for: Prevalence and causes of anaemia in children aged 6–23 months in rural Qinghai, China: findings from a cross-sectional study
Source: PubMed Central journal article supplement — BMJ Open. 2019 Sep 8;9(9):e031021. doi: 10.1136/bmjopen-2019-031021 (PMC6738674; doi:10.1136/bmjopen-2019-031021), 2019-09-08
Supplement: bmjopen-2019-031021.draft_revisions.pdf [file bmjopen-2019-031021.draft_revisions.pdf]

# BMJ Open

BMJ Open is committed to open peer review. As part of this commitment we make the peer review history of every article we publish publicly available.

When an article is published we post the peer reviewers' comments and the authors' responses online. We also post the versions of the paper that were used during peer review. These are the versions that the peer review comments apply to.

The versions of the paper that follow are the versions that were submitted during the peer review process. They are not the versions of record or the final published versions. They should not be cited or distributed as the published version of this manuscript.

BMJ Open is an open access journal and the full, final, typeset and author-corrected version of record of the manuscript is available on our site with no access controls, subscription charges or pay-per-view fees (<http://bmjopen.bmj.com>).

If you have any questions on BMJ Open's open peer review process please email [editorial.bmjopen@bmj.com](mailto:editorial.bmjopen@bmj.com)

# BMJ Open

## High anaemia prevalence and its causes in children aged 6-23 months in rural Qinghai, China: findings from a cross-sectional study

|                               |                                                                                                                                                                                                                                                                                                                                                                                                                                                                                                                                                                                                                                                                                                                                               |
|-------------------------------|-----------------------------------------------------------------------------------------------------------------------------------------------------------------------------------------------------------------------------------------------------------------------------------------------------------------------------------------------------------------------------------------------------------------------------------------------------------------------------------------------------------------------------------------------------------------------------------------------------------------------------------------------------------------------------------------------------------------------------------------------|
| Journal:                      | <i>BMJ Open</i>                                                                                                                                                                                                                                                                                                                                                                                                                                                                                                                                                                                                                                                                                                                               |
| Manuscript ID                 | bmjopen-2019-031021                                                                                                                                                                                                                                                                                                                                                                                                                                                                                                                                                                                                                                                                                                                           |
| Article Type:                 | Research                                                                                                                                                                                                                                                                                                                                                                                                                                                                                                                                                                                                                                                                                                                                      |
| Date Submitted by the Author: | 12-Apr-2019                                                                                                                                                                                                                                                                                                                                                                                                                                                                                                                                                                                                                                                                                                                                   |
| Complete List of Authors:     | Huang, Yiwen; Capital Institute of Pediatrics, Department of Integrated Early Childhood Development<br>Wang, Lijuan; Chinese Center for Disease Control and Prevention National Institute for Nutrition and Health<br>Huo, Junsheng; Chinese Center for Disease Control and Prevention National Institute for Nutrition and Health<br>Wu, Qiong; Capital Institute of Pediatrics, Department of Integrated Early Childhood Development<br>Wang, Wei; Capital Institute of Pediatrics, Department of Integrated Early Childhood Development<br>Chang, Suying; UNICEF, Health and Nutrition, Water, Environment and Sanitation Section<br>Zhang, Yanfeng; Capital Institute of Pediatrics, Department of Integrated Early Childhood Development |
| Keywords:                     | Anaemia < HAEMATOLOGY, Nutrition < TROPICAL MEDICINE, iron deficiency, children, China                                                                                                                                                                                                                                                                                                                                                                                                                                                                                                                                                                                                                                                        |
|                               |                                                                                                                                                                                                                                                                                                                                                                                                                                                                                                                                                                                                                                                                                                                                               |

SCHOLARONE™  
Manuscripts

**ORIGINAL ARTICLE****Title page****High anaemia prevalence and its causes in children aged 6-23 months in rural****Qinghai, China: findings from a cross-sectional study**

Yiwen Huang<sup>1\*</sup>, B.Sci; Lijuan Wang<sup>2\*</sup>, PhD; Junsheng Huo<sup>2</sup>, PhD; Qiong Wu<sup>1</sup>, MSc; Wei Wang<sup>1</sup>, MSc; Suying Chang<sup>3</sup>, PhD; Yanfeng Zhang<sup>1</sup>, MSc

<sup>1</sup>Department of Integrated Early Childhood Development, Capital Institute of Pediatrics, Beijing, China

<sup>2</sup>Institute for Nutrition and Health, Chinese Center for Disease Control and Prevention, Beijing, China

<sup>3</sup>Health and Nutrition, Water, Environment and Sanitation Section, UNICEF China, Beijing, China

\*These authors contribute equally to this paper.

**Corresponding Author:**

Suying Chang, PhD

Health and Nutrition, Water, Environment and Sanitation Section, UNICEF China, Beijing, China

Address: 12, Sanlitun Lu, Beijing, 100600, P.R. China.

Phone: 8610 85312678

Fax: 8610 65323107

1  
2  
3  
4 Email: [schang@unicef.org](mailto:schang@unicef.org)  
5  
6  
7

8 Yanfeng Zhang, MSc  
9

10 Department of Integrated Early Childhood Development, Capital Institute of Pediatrics,  
11  
12 Beijing, China.  
13

14 Address: No. 2 Yabao Road, Chaoyang District, Beijing, 100020, P.R. China.  
15

16 Phone: 8610 85695554  
17

18 Fax: 8610 85622025  
19

20 Email: [summyzh@126.com](mailto:summyzh@126.com)  
21  
22

23  
24 **Key words:**  
25

26 Anaemia; iron deficiency; nutrition; children; China  
27  
28

29 **Word count:**  
30

31 4310  
32  
33  
34  
35  
36  
37  
38  
39  
40  
41  
42  
43  
44  
45  
46  
47  
48  
49  
50  
51  
52  
53  
54  
55  
56  
57  
58  
59  
60

## ABSTRACT

**Objective:** To investigate the current situation of anaemia among children aged 6-23 months in a rural county in China, and to explore the influencing factors and the main causes of anaemia.

**Design:** A cross-sectional study.

**Setting:** Huzhu County in Qinghai Province, China

**Participants:** We selected 38 sampled villages using Proportional to Population Size sampling method. We surveyed all the eligible children aged 6-23 months and their caregivers in each sampled village.

**Primary and secondary outcomes measures:** The prevalence of anaemia, the influencing factors of anaemia, the laboratory tests for causes of anaemia, including serum ferritin, sTfR, folic acid, Homocysteine and Vitamin B12.

**Results:** A total of 754 children aged 6-23 months and their caregivers were surveyed, and 183 anaemic children aged 12-23 months were collected venous blood sample. The anaemia prevalence of children aged 6-23 months in Huzhu County was 59.1%. Children of younger age (OR=0.968, 95%CI 0.940, 0.998), Tibetan nationality (OR=3.123, 95%CI 1.473,6.623)and not introducing meat (OR=0.698, 95%CI 0.499,0.976) were more likely to be anaemic. More than 80% of children with anaemia were due to iron deficiency, and 20.2% of them had both iron and folic acid deficiencies.

**Conclusions:** The anaemia prevalence of children aged 6-23 months in Huzhu County

1  
2  
3  
4 was high and children of younger age, Tibetan nationality and not introducing meat  
5 were more likely to be anaemic. The main cause of anaemia was nutritional anaemia,  
6 with the vast majority being iron deficiency. Interventions of feeding counseling and  
7 nutrients supplements are appropriate and should be further strengthened.  
8  
9  
10

11  
12  
13 **Strengths and limitations of this study:** The strengths of our study are as follows.  
14 Firstly, we proved that iron deficiency was the leading cause of anaemia for young  
15 children in Huzhu county. Secondly, we identified specific age and ethnic groups of  
16 children who were more vulnerable to be anaemic. Thirdly, we found a rebound of  
17 anaemia prevalence based on continuous data collection since 2012. All these findings  
18 will provide guidance for the future implementation of the on-going interventional  
19 program. Our study also has several limitations. Firstly, the study took place only  
20 within one rural Chinese county and caution is needed when generalizing the findings  
21 from this study to other settings. Secondly, the sample size was small. Thirdly, we only  
22 explored nutritional causes of child anaemia, so the anaemic causes of for nearly 20%  
23 of children were still unknown.  
24  
25  
26  
27  
28  
29  
30  
31  
32  
33  
34  
35  
36

37 **Trial registration number:** ChiCTRPRC12002444 (Feb 15th, 2016; Version1).  
38  
39  
40

## 41 **Main text**

### 42 **INTRODUCTION**

43  
44  
45  
46  
47  
48 Childhood anaemia has long been a major public health problem worldwide. A  
49 systematic analysis of population-representative data suggested that anaemia  
50 prevalence in children younger than 5 years was 43% and there were 273 million  
51 children with anaemia globally in 2011<sup>1</sup>. The national anaemia prevalence in children  
52 under 5 in China fluctuated between 12% and 23% between 1990 and 2005 and then  
53 decreased from 19.3% in 2005 to 12.6% in 2010<sup>2</sup>. National Nutrition and Health  
54  
55  
56  
57  
58  
59  
60

1  
2  
3  
4 Surveillance in 2013 showed that the prevalence of anaemia among children aged 0-  
5 5 years was 11.6% across the country, 10.6% in urban areas and 12.4% in rural areas  
6 respectively. However, huge regional differences exist, with rural Qinghai province  
7 being the highest (27.5%)<sup>3</sup>. In some rural areas, anaemia prevalence in children aged  
8 6-23 months was higher than 30%<sup>4,5</sup>.

9  
10  
11  
12  
13  
14  
15 In the public health perspective, anaemia is defined by the World Health Organization  
16 as a hemoglobin concentration 2 SDs below the mean hemoglobin concentration for  
17 a normal population of the same gender and the same age group<sup>6</sup>. Anaemia has  
18 irreversible adverse effects on childhood growth and development, even their  
19 working abilities in adulthood<sup>7</sup>. Many studies suggested an association between  
20 anaemia and impaired psychomotor development; impaired cognitive functions such  
21 as concentration, intellectual status, memory and scholastic skills; psychological and  
22 behavioral disorders such as attention-deficit/hyperactivity disorder (ADHD)<sup>8</sup> and  
23 autism spectrum disorder (ASD)<sup>9</sup>; decreased physical activity<sup>10</sup>. Meanwhile, anaemia  
24 has been confirmed to be associated with impaired renal function, increased  
25 absorption of lead, and impaired immunity<sup>11</sup>. The Global Burden of Disease (GBD)  
26 2000 report estimated that anaemia resulted in 68.4 million years lived with disability  
27 (YLD), accounting for 8.8% the total number of all cases of disability<sup>12</sup>, and the GBD  
28 2004 update had similar findings, which exerted a substantial economic burden<sup>13</sup>.

29  
30  
31  
32  
33  
34  
35  
36  
37  
38  
39  
40  
41  
42  
43  
44  
45 Our previous study in Qinghai Province found that the prevalence of anaemia in rural  
46 areas was much higher than the national average level. In 2012, the prevalence of  
47 anaemia among children aged 6-23 months in Huzhu, Minhe and Guinan County was  
48 71.1%, 56.1% and 86.3%, respectively<sup>14</sup>. We carried out a controlled interventional  
49 study in Huzhu and Guinan county from 2012 to 2014. And all children aged 6-23  
50 months in the intervention county, Huzhu County, received YingYangBao (a  
51 domestically produced multiple micronutrient powders for infants and young children)  
52 and their caregivers received infant feeding counseling from trained village doctors.  
53  
54  
55  
56  
57  
58  
59  
60

1  
2  
3  
4 The study found that the anaemia prevalence significantly decreased from 71.1% to  
5 47.8% in Huzhu County <sup>15</sup>. WHO defines the prevalence of anaemia in the population  
6 less than 20% as a mild public health problem, 20% to 40% as a moderate public health  
7 problem, and the prevalence of anaemia in the population  $\geq 40\%$  as a serious public  
8 health problem <sup>16</sup>. Therefore, childhood anaemia in Huzhu County is still a serious  
9 public health problem in spite of the dramatic reduction of anaemia prevalence after  
10 the intervention, and more efforts are needed to further decrease anaemia  
11 prevalence and improve the nutrition status of children.  
12  
13  
14  
15  
16  
17  
18  
19  
20

21 There are many reasons for anaemia: acute and chronic infections that result in  
22 inflammation (including chronic blood loss caused by hookworm infection or  
23 schistosomiasis); nutritional anaemia caused by iron deficiency and other  
24 micronutrient deficiencies, especially of folic acid, vitamin B12 and vitamin A; and  
25 genetically inherited traits such as thalassemia <sup>17</sup>. Although it is generally accepted  
26 that nutrients deficiency is the leading cause of child anaemia, proportions of anaemic  
27 causes in specific areas are usually unknown. Since interventions based on  
28 improvement of child feeding and nutrients supplements are only effective for  
29 nutritional anaemia, understanding the status of anaemia-related nutrients (iron, folic  
30 acid and vitamin B12) is crucial to estimate the potential effectiveness of nutritional  
31 interventions. The purpose of this study is to investigate the current situation of  
32 anaemia among children aged 6-23 months in Huzhu County, and to explore the  
33 influencing factors and the main causes of anaemia, so as to develop more appropriate  
34 strategies for combating this intractable public health issue.  
35  
36  
37  
38  
39  
40  
41  
42  
43  
44  
45  
46  
47  
48  
49  
50

## 51 **METHODS**

### 52 **Study design**

53 This study was conducted as a cross-sectional survey of children aged 6-23 months  
54 and their caregivers in Huzhu county, Qinghai province. Proportional to Population  
55 Size (PPS) sampling method was used to select sampled villages in the county, and all  
56  
57  
58  
59  
60



1  
2  
3  
4 the eligible children aged 6-23 months and their caregivers in each sampled village  
5 were surveyed. The HemoCue Hb 301 analyzer (HemoCue, Lake Forest, CA, USA) was  
6 used to collect children's fingertip peripheral blood by using microcuvettes (for blood  
7 samples) to detect hemoglobin levels of children in the all sampled villages. 4-7 days  
8 after the survey, anaemic children screened out by HemoCue Hb 301 analyzer were  
9 called to Huzhu Maternal and Child Health and Family Planning Service Center to draw  
10 venous blood sample for further blood routine test and laboratory tests.  
11  
12  
13  
14  
15  
16  
17  
18

### 19 **Study setting**

20  
21 Qinghai Province lies in northwest China, with an area of around 720,000 km<sup>2</sup>. By the  
22 end of 2017, the resident population of the province was 5,838,000, of which the  
23 resident population of rural areas was 2,808,400, accounting for 46.9%, and the ethnic  
24 minority population was 2,854,900, accounting for 47.7%. Qinghai Province has 34  
25 counties and 439 townships. The Qinghai resident per capita disposable income in  
26 2017 was ¥9,462 (US\$1363.13)<sup>18</sup> for rural people, which was far lower than the  
27 national level (¥13,432(US\$1935.06))<sup>19</sup>.  
28  
29  
30  
31  
32  
33  
34  
35  
36

37 Huzhu County is located in the northeastern part of Qinghai Province and 27.9% of its  
38 population is part of an ethnic minority, which includes Tu, Tibetan, Hui and other 28  
39 ethnic minorities<sup>20</sup>. Huzhu County covers an area of 3,424 km<sup>2</sup>. The county governs  
40 19 townships with 294 villages, with a total population of 401,540, of which the rural  
41 population accounted for 76.0%. By the end of 2017, the resident per capita  
42 disposable income in the rural area was ¥9810 (US\$1414.91)<sup>21</sup>.  
43  
44  
45  
46  
47  
48  
49

### 50 **Participants**

51  
52 Children aged 6-23 months and their caregivers were invited to participate in this  
53 survey. We excluded children with a structural or genetic birth defect such as neural  
54 tube defects, congenital heart disease or phenylketonuria or caregivers who refused  
55 to participate.  
56  
57  
58  
59  
60

### Survey instrument

We used the questionnaire, the maternal, newborn and child health household survey (MNCH HHS) questionnaire, to collect household information and infant feeding practices in each sampled village.

### Sample size and Sampling

The sample size required were calculated based upon estimated anaemia prevalence in Huzhu County. We expected to draw 200 venous blood sample of anaemic children aged 12-23 months. According to the estimated anaemia prevalence of 35% in Huzhu County, we calculated the total number of children aged 12-23 months surveyed was 571. And according to the age composition of local children, the number of children aged 6-12 months was about half of the number of children aged 12-23 months. Hence a sample size of 856 children aged 6-23 months would be sufficient in this study.

We understood the average number of children aged 6-23 months in each villages of Huzhu County from the local Maternal and Child Health Family Planning Service Centre. Proportional to Population Size (PPS) sampling method was used to select 38 sampled villages to meet our sample size requirements in the county. We surveyed all the eligible children aged 6-23 months and their caregivers in each sampled village.

### Training of Interviewers

Staff from the Capital Institute of Pediatrics in Beijing were supervisors for this survey, and 25 students were recruited from Qinghai Institute of Health Sciences as interviewers. We provided them training for two days before fieldwork, which included communication skills, explanation of questionnaires, demonstration, role plays, field practice, and group discussions. In addition, 4 of them were trained on measuring hemoglobin levels with a HemoCue Hb 301 analyzer. After the training, a half-day field practice was held in a village clinic. Any problems arising during the field

1  
2  
3  
4 practice were discussed and solved directly.  
5  
6

### 7 **Data collection**

8  
9 We carried out the survey from July 23th to 27th 2018. In every surveyed township,  
10 staff notified the village doctors of the sample villages in advance, then the village  
11 doctor called the caregivers to take their children to the village clinic for investigation.  
12  
13 Firstly, interviewers introduced the aim of the survey to the mothers or other  
14 caregivers and obtained written informed consent from them. Then the interviewers  
15 questioned them following the instructions.  
16  
17  
18  
19  
20  
21  
22

23 We used smartphones with the household survey questionnaire set up in specially  
24 developed software to record data <sup>22</sup>. Four teams of interviewers carried out the  
25 survey, with 6 surveyors and 1 supervisor in each team. Data for each questionnaire  
26 were uploaded into an Excel database via the Internet server. Once the interview was  
27 completed, the special surveyor in each team measured hemoglobin with a HemoCue  
28 Hb 301 analyzer (HemoCue, Lake Forest, CA) by drawing around 10 ul finger blood.  
29  
30  
31  
32  
33  
34  
35

36 Children aged 12-23 months screened as anaemia by HemoCue Hb 301 analyzer were  
37 informed to go to the Huzhu County Maternal and Child Health Family Planning Service  
38 Centre for further tests from July 31 to August 1 2018. About 4-5ml venous blood of  
39 each children were collected by experienced nurses and placed into two tubes. The  
40 first 1-2ml blood sample was collected into a labeled EDTA-K2 coated tube for blood  
41 routine test using whole blood. And the second 3ml blood sample was collected  
42 (without removing the needle) into a labeled vacuum separating tube for serum  
43 ferritin(SF), soluble transferrin receptor(sTfR), C-reactive protein(CRP),  $\alpha$ -1 acid  
44 glycoprotein(AGP), vitamin B12, Homocysteine(HCY), and folic acid concentration  
45 using serum.  
46  
47  
48  
49  
50  
51  
52  
53  
54  
55  
56  
57

58 Blood routine test and blood centrifugation were completed in the local laboratory.  
59  
60

1  
2  
3  
4 The blood sample in labeled vacuum separating tubes were placed for 30 minutes,  
5 then were centrifuged at 1500 turn/minute for 15 minutes. The serum was separated  
6 into 1, 2 and 3 cryotubes using disposable pipettes.  
7  
8  
9

10  
11 After the field work, all the blood samples were immediately stored at -70 °C and  
12 transported as soon as possible to Nutritional Institute for Institute for Nutrition and  
13 Health, China Center for Disease Control and Prevention for further laboratory testing.  
14 Repeated freezing and thawing were strictly avoided during transportation and  
15 storage.  
16  
17  
18  
19  
20  
21  
22

### 23 **Laboratory analysis**

24  
25 The blood routine test was conducted using automatic blood cell analyzer (Horiba,  
26 ABX Micros 60-OT, France) in local laboratory. SF, vitamin B12 and serum folic acid  
27 were analyzed by Roche Cobas e601 analyzer (Germany) using  
28 electrochemiluminescence immunoassay (ECLIA). sTfR, CRP, AGP were analyzed by  
29 Hitachi 7600-110 chemistry autoanalyzer (Japan) using immunoturbidimetry and HCY  
30 was analyzed by Hitachi 7600-110 chemistry autoanalyzer (Japan) using enzymatic  
31 cycling assay.  
32  
33  
34  
35  
36  
37  
38  
39  
40

### 41 **Data management and statistical analysis**

42  
43 Data of questionnaires were automatically transformed and pooled into a Microsoft  
44 Excel sheet. After the data cleaning, we converted the database into a database file  
45 (dbf) for the final analysis.  
46  
47  
48  
49

50  
51 We carried out statistical analysis with SAS 9.2 for Windows. The median (Q1, Q3) was  
52 used to describe the age in years of mothers and grandparents of children. Mean and  
53 standard deviation (SD) was used to describe the values of serum ferritin and body  
54 iron. Percentages were presented in binary or categorical variables. We used the  
55 Pearson  $\chi^2$ -test and Fisher exact test to compare binary and categorical variables.  
56  
57  
58  
59  
60

1  
2  
3  
4  
5  
6  
7  
8  
9  
10  
11  
12  
13  
14  
15  
16  
17  
18  
19  
20  
21  
22  
23  
24  
25  
26  
27  
28  
29  
30  
31  
32  
33  
34  
35  
36  
37  
38  
39  
40  
41  
42  
43  
44  
45  
46  
47  
48  
49  
50  
51  
52  
53  
54  
55  
56  
57  
58  
59  
60

Moreover, we carried out a logistic regression analysis to identify factors associated with children's anaemia in this survey. All relevant factors were first selected by univariate logistic analysis. Only those that were significant in the final multivariate model are presented. We present Odds Ratios (OR) and 95% confidence intervals (CI) and considered two-tailed P-values of <0.05 for a significant difference.

All individual hemoglobin values were adjusted using WHO recommendations based on the altitude of the surveyed villages where children lived. An adjusted hemoglobin lower than 110g/l<sup>16</sup> was defined as anaemia and was used to calculate the prevalence of anaemia. A hemoglobin concentration of 90–110 g/L was defined as mild anaemia, <90 g/L as moderate anaemia or severe anaemia. Cut-offs for elevated CRP and AGP were >5mg/l and >1mg/l, respectively<sup>23</sup>. If one of these two indicators were elevated, the children surveyed were classified as infected children. Serum ferritin concentration <12ug/l and <30ug/l were used to define iron deficiency in non-infected children and infected children, respectively. The children with concurrent anaemia and iron deficiency were diagnosed with iron deficiency anaemia<sup>24</sup>. A plasma folic acid concentration of <4ng/ml was used to define folic acid deficiency according to WHO guidelines<sup>25</sup>. Vitamin B12 deficiency was defined as <197pg/ml. Cut-offs for elevated sTfR and HCY were 8.3mg/l and 14umol/l, respectively<sup>26</sup>.

Body iron stores (BI) were estimated by applying Cook's formula as follows:  $\text{body iron(mg/kg)} = -[\log(\text{R/F ratio}) - 2.82290] / 0.1207$ . The R/F ratio was soluble transferrin receptor (sTfR) / serum ferritin (SF)<sup>27</sup>. Among them, sTfR needs to be transformed by the following formula:  $\text{Flowers sTfR} = 1.5 * \text{Roche sTfR} + 0.35\text{mg/l}$ <sup>28</sup>. The positive value means iron surplus in stores and the negative value means iron deficit in tissues.

### **Ethical considerations**

The study was approved by the Ethics Committee of the Capital Institute of Pediatrics

(reference no.2018017). All interviewees read the Information Sheet and provided written consent on behalf of the children involved in our study.

### Participant and public involvement

The participants and the public were not involved in the design, recruitment and conduct of the study. There are no plans to disseminate the study findings to the study participants.

## RESULTS

The flowing chart of this study is shown in **Figure 1**. A total of 754 children aged 6-23 months and their caregivers were surveyed, with 444 being anaemic. 183 children aged 12-23 months agreed to draw venous blood for further laboratory tests, and 52 of them were found acute and/or chronic infections (CRP > 5 mg/l in blood routine test or AGP > 1 g/l in laboratory test).

Characteristics of 754 surveyed children and their caregivers are shown in **Table 1**. Nearly all main caregivers of the children surveyed were mothers and grandparents, and about 70% of mothers were Han nationality, followed by Tu and Tibetan nationality. More than 60% of mother attended junior high school, and the proportion of mothers who were illiterate was only 4.0%. More than half of grandparents were still illiterate. The main source of household income was working outside the county, followed by agriculture-related work such as growing crops, vegetables and animal husbandry.

**Table1 Characteristics of surveyed children and their caregivers (N=754)**

| Characteristic  | Percentage or median |
|-----------------|----------------------|
| <b>Children</b> |                      |
| Age, %(n)       |                      |
| 6-11months      | 32.8(247)            |

|                                |           |
|--------------------------------|-----------|
| 12-17months                    | 32.6(246) |
| 18-23months                    | 34.6(261) |
| <b>Sex, %(n)</b>               |           |
| Boy                            | 52.1(393) |
| Girl                           | 47.9(361) |
| <b>Main caregivers, %(n)</b>   |           |
| Mother                         | 48.7(367) |
| Grandparent                    | 46.4(350) |
| Father                         | 4.8(36)   |
| Other                          | 0.1(1)    |
| <b>Mothers</b>                 |           |
| Age in years (median (Q1, Q3)) | 29(26,31) |
| <b>Nationality, %(n)</b>       |           |
| Han                            | 69.9(523) |
| Tu                             | 22.8(171) |
| Tibetan                        | 6.3(47)   |
| Hui                            | 0.3(2)    |
| Others                         | 0.7(5)    |
| <b>Education, %(n)</b>         |           |
| Illiterate                     | 4.0(30)   |
| Primary school                 | 13.8(103) |
| Junior high school             | 61.6(461) |
| Senior high school or above    | 17.4(130) |
| Do not know                    | 3.2(24)   |
| <b>Grandparents</b>            |           |
| Age in year (median (Q1, Q3))  | 54(50,59) |
| <b>Education, %(n)</b>         |           |
| Illiterate                     | 60.3(211) |
| Primary school                 | 22.6(79)  |
| Junior high school             | 15.1(53)  |
| Senior high school             | 1.1(4)    |
| Do not know                    | 0.9(3)    |
| <b>Household income, %(n)</b>  |           |
| Working outside the county     | 89.2(673) |

|                          |         |
|--------------------------|---------|
| Agriculture-related work | 6.4(48) |
| Self-employed            | 2.9(22) |
| Others                   | 1.2(9)  |
| Do not know              | 0.3(2)  |

**Table 2** shows the prevalence of anaemia and hemoglobin levels by age and severity in this survey. Most of anaemic children were mildly anaemic, accounting for 76.9% of the total. The prevalence of anaemia in the 18 to 23-month group was significantly lower than that in the 6 to 11-month group ( $p=0.0026$ ) and the 12 to 17-month group ( $p=0.0261$ ). The median hemoglobin levels in the 6 to 11-month group and 12 to 17-month group were lower than that in the 18 to 23-month group (116g/l vs. 121 g/l,  $p<0.0001$  and  $p=0.0004$  respectively).

**Table 2 Prevalence of anaemia and hemoglobin level by age and severity**

|         | Anaemia prevalence ( N=751 ) * |                    |           | Hemoglobin level<br>(median, (Q1, Q3)) |
|---------|--------------------------------|--------------------|-----------|----------------------------------------|
|         | Mild anaemia                   | Moderate or severe | Total     |                                        |
|         | (%, n)                         | anaemia (%, n)     | (%, n)    |                                        |
| 6-11m   | 49.8(123)                      | 15.0(37)           | 64.8(160) | 116(106,125)                           |
| 12-17 m | 51.2(126)                      | 10.2(25)           | 61.4(151) | 116(107,125)                           |
| 18-23 m | 43.4(112)                      | 8.1(21)            | 51.6(133) | 121(111,130)                           |
| Total   | 48.1(361)                      | 11.1(83)           | 59.1(444) | 117(108,127)                           |

\*Three children refused to measured hemoglobin levels.

**Table 3** shows the results of a univariate logistic analysis of anaemia prevalence in this survey. Older children were less likely to suffer from anaemia than younger children ( $p=0.0028$ ). The prevalence of anaemia in children with Tibetan nationality was significantly higher than those with Han nationality ( $p<0.0001$ ). The prevalence of anaemia in children who consumed iron-rich or iron-fortified foods was significantly lower than that in children who did not consume these foods ( $p=0.0150$ ). The prevalence of anaemia in children who were given meat was also significantly lower



than that in children without meat ( $p=0.0077$ ). Furthermore, the anaemia prevalence of children achieving minimum dietary diversity was significantly lower than that of children who did not meet the standard ( $p=0.0163$ ).

**Table 3 Univariate logistic analysis of the prevalence of anaemia**

| Factors                                                   | Sample | Case | Anaemia | P-value |
|-----------------------------------------------------------|--------|------|---------|---------|
| Child's age                                               |        |      |         | 0.0028  |
| Nationality                                               |        |      |         |         |
| Han                                                       | 521    | 291  | 55.9    |         |
| Hui                                                       | 2      | 0    | 0       | 0.9799  |
| Tu                                                        | 170    | 108  | 63.5    | 0.0836  |
| Tibetan                                                   | 47     | 38   | 80.9    | 0.0016  |
| Other                                                     | 5      | 3    | 60.0    | 0.8570  |
| Children aged 6-23 given iron-rich or iron-fortified food |        |      |         |         |
| Yes                                                       | 475    | 265  | 55.8    | 0.0150  |
| No                                                        | 276    | 179  | 64.9    |         |
| Introduction of meat                                      |        |      |         |         |
| Yes                                                       | 210    | 108  | 51.4    | 0.0077  |
| No                                                        | 541    | 336  | 62.1    |         |
| Minimum dietary diversity                                 |        |      |         |         |
| Yes                                                       | 364    | 199  | 54.7    | 0.0163  |
| No                                                        | 387    | 245  | 63.3    |         |

The results of multivariate logistic analysis of anaemia prevalence in surveyed children is shown in **Table 4**. Older children (OR=0.968, 95%CI 0.940, 0.998) and those consuming meat (OR=0.698, 95%CI 0.499,0.976) were associated with lower anaemia levels, whereas children of Tibetan nationality (OR=3.123, 95%CI 1.473,6.623) were more likely to be anaemic.

**Table 4 Multivariate logistic analysis of anaemia prevalence**

| Independent variable | Influential factors of anaemia |      |   |            |
|----------------------|--------------------------------|------|---|------------|
|                      | $\beta$                        | Wald | P | OR (95%CI) |

|                      |          |        |        |                    |
|----------------------|----------|--------|--------|--------------------|
| Child' age           | -0.0321  | 4.4930 | 0.0340 | 0.968(0.940,0.998) |
| Nationality          |          |        |        |                    |
| Hui –Han             | -13.6385 | 0.0006 | 0.9797 | <0.001             |
| Tu-Han               | 0.3038   | 2.7371 | 0.0980 | 1.335(0.945,1.942) |
| Tibetan-Han          | 1.1388   | 8.8166 | 0.0030 | 3.123(1.473,6.623) |
| Other-Han            | 0.0294   | 0.0010 | 0.9745 | 1.030(0.169,6.260) |
| Introduction of meat | -0.3595  | 4.4118 | 0.0357 | 0.698(0.499,0.976) |

Results of the laboratory tests for 183 children are shown in **Table 5**. There were 113 children with iron deficiency, accounting for 61.7%. The mean serum ferritin concentration in anaemic children was significantly lower than that in non-anaemic children ( $10.2 \pm 9.6\text{ng/ml}$  vs.  $22.6 \pm 15.9\text{ng/ml}$ ,  $p < 0.0001$ ). The body iron store in anaemic children was significantly lower than that in non-anaemic children ( $-3.1 \pm 4.4\text{mg/kg}$  vs.  $2.1 \pm 3.3\text{mg/kg}$ ,  $p < 0.0001$ ). 32.6% of children with anaemia had elevated sTfR, significantly higher than that in children without anaemia (4.3%,  $p < 0.0001$ ). At the same time, the proportion of folic acid deficiency in anaemic children was also significantly higher than that in non-anaemic children (20.2% vs. 5.3%,  $p = 0.0024$ ). There was no vitamin B12 deficiency either in anaemic or non-anaemic children.

**Table 5 Results of laboratory tests**

|                                                                            | Anaemic children (N=89) | Non-anaemic children (N=94) | Total (N=183)   | <i>p</i> |
|----------------------------------------------------------------------------|-------------------------|-----------------------------|-----------------|----------|
| Serum ferritin(ug/l)                                                       |                         |                             |                 |          |
| Mean $\pm$ SD                                                              | $10.2 \pm 9.6$          | $22.6 \pm 15.9$             | $16.6 \pm 14.6$ | <0.0001  |
| <12ug/l for non-infected children or <30ug/l for infected children (% , n) | 80.9% (72)              | 43.6% (41)                  | 61.7% (113)     | <0.0001  |
| sTfR (>8.3mg/l) (% , n)                                                    | 32.6% (29)              | 4.3% (4)                    | 18.0% (33)      | <0.0001  |

|                                  |                |               |                  |         |
|----------------------------------|----------------|---------------|------------------|---------|
| Body iron store (mean $\pm$ SD)  | -3.1 $\pm$ 4.4 | 2.1 $\pm$ 3.3 | -0.45 $\pm$ 4.56 | <0.0001 |
| Folic acid (<4ng/ml) (% , n)     | 20.2% (18)     | 5.3% (5)      | 12.6% (23)       | 0.0024  |
| Vitamin B12 (<197pg/ml) (% , n)  | 0.0% (0)       | 0.0% (0)      | 0.0% (0)         | -       |
| Homocysteine (>14umol/l) (% , n) | 4.5% (4)       | 1.1% (1)      | 2.7% (5)         | 0.1425  |

**Figure 2** shows causes of anaemia. 80.9% of children with anaemia were due to iron deficiency, and 20.2% of them had both iron and folic acid deficiencies. The causes of 19.1% anaemic children were unknown.

## DISCUSSION

### Main findings

The anaemia prevalence of children aged 6-23 months in Huzhu County was 59.1% and most of them were mildly anaemic. The prevalence of anaemia in the 18 to 23-month group was significantly lower than that in the 6 to 11-month group ( $p=0.0026$ ) and the 12 to 17-month group ( $p=0.0261$ ). Meanwhile, children of younger age, Tibetan nationality and not introducing meat were more likely to be anaemic. 80.9% of children with anaemia were due to iron deficiency, and 20.2% suffered from both iron deficiency and folic acid deficiency. The prevalence of iron deficiency among all children was 61.7% and 43.6% of non-anaemic children also had iron deficiency. Body iron stores in all children tested averaged  $-0.45\pm 4.56$  mg/kg. The proportion of microcytic hypochromic anaemia (MCH, MCV and MCHC were lower than normal value) was 13.1%. And the specificity of the combination of MCV + MCH + MCHC in the diagnosis of iron deficiency anaemia was 100%, but its sensitivity was only 17.8%.

### Influencing factors of anaemia

Children aged 6-11 months are in the transition period from exclusive breastfeeding to complementary feeding, during which the storage iron from birth is depleted and complementary foods become the main source of iron, therefore, they were more

1  
2  
3  
4 likely to suffer from anaemia. In our study, anaemia prevalence of children at this age  
5 is the highest (64.8%).  
6  
7

8  
9  
10 Our analysis showed that eating meat was a protective factor of child anaemia,  
11 however, few caregivers gave meat to their children of this age due to the wrong  
12 beliefs that they could not digest meat. In addition, some caregivers did not know how  
13 to prepare meat for young infants, especially at the very beginning of complementary  
14 feeding <sup>29</sup>, thus infant feeding counseling should include these specific issues to  
15 provide caregivers accurate knowledge and help them solve problems, such as  
16 demonstration of the preparation of meat instead of just giving information.  
17  
18  
19  
20  
21  
22

23  
24  
25 Compared with other nationalities, children of Tibetan nationality, who accounted for  
26 about 10% in Huzhu County, were more likely to be anaemic<sup>14</sup>, probably because their  
27 special customs and dietary habits with the main complementary food for children  
28 being zanba (a local ethnic food consisting mainly of carbohydrates) and porridge,  
29 which contain very few irons<sup>30, 31</sup>. At the same time, poor family economic conditions  
30 would also make it unaffordable to feed animal food to their children <sup>32</sup>.  
31  
32  
33  
34  
35  
36  
37  
38

### 39 **The causes of anaemia**

40 The causes of anaemia can generally be summarized into three categories: nutritional  
41 anaemia, infectious diseases and genetic hemoglobin disorders. Nutritional anaemia  
42 results from insufficient bioavailability of hemopoietic nutrients (iron, vitamin B12,  
43 vitamin A and folic acid) needed to meet the demands of hemoglobin and erythrocyte  
44 synthesis and decreased absorption enhancers such as vitamin C. Infectious diseases  
45 include soil-transmitted helminths, malaria and schistosomiasis. Genetic hemoglobin  
46 disorders include thalassemia and hemoglobin variants etc<sup>17</sup>. Many previous studies  
47 have found that iron deficiency may be the most common cause of anaemia <sup>1, 6, 17, 33</sup>.  
48 Our study confirmed that 80.9% of anaemic children aged 12-23 months in Huzhu  
49 County were due to iron deficiency. The prevalence of iron deficiency among all  
50  
51  
52  
53  
54  
55  
56  
57  
58  
59  
60

1  
2  
3  
4 children was 61.7% and body iron stores in all children tested averaged only -  
5  
6 0.45±4.56 mg/kg.  
7  
8

9  
10 Iron deficiency (ID) is a state in which iron is insufficient to maintain normal  
11  
12 physiological functions of tissues such as blood, brain, and muscle. If iron deficiency  
13  
14 lasts too long or is serious enough, it can result in iron deficiency anaemia (IDA)<sup>6</sup>. In  
15  
16 addition to the important role of oxygen carrier in the heme group of hemoglobin,  
17  
18 iron also exists in many key proteins in cells, such as cytochromes, myoglobin, neural  
19  
20 transmitters, various enzymes and coenzymes<sup>34</sup>. Therefore, iron deficiency not only  
21  
22 causes anaemia, but also has many other adverse effects, especially on children in  
23  
24 growth and development.  
25

26  
27 Iron deficiency is often found in association with a deficiency of folic acid. Combined  
28  
29 folic and iron deficiency may occur in preterm infants who are fed unfortified formula  
30  
31 based on evaporated milk. Other study indicated that infants fed on goat's milk were  
32  
33 also at risk<sup>35</sup>. Our study found that 20.2% of children suffered from both iron  
34  
35 deficiency and folic acid deficiency. Hence, attentions also need to be paid to the  
36  
37 deficiency of folic acid. There was no vitamin B12 deficiency either in anaemic or non-  
38  
39 anaemic children tested. However, causes of the remaining 19.1% of anaemic children  
40  
41 were still unknowns and may need further explorations.  
42  
43  
44

#### 45 **Recommendations on reducing nutritional anaemia**

46  
47 Deficiencies of iron and folic acid were the main causes of children's anaemia in Huzhu  
48  
49 County, therefore, previous interventions of feeding counseling and nutrients  
50  
51 supplements are appropriate and should be further strengthened.  
52  
53

54  
55 (1) Improving traditional delivery channels for infant and young child feeding (IYCF).

56  
57 IYCF is one of the key strategies to lower the risk of iron-deficiency anaemia in early  
58  
59 infancy<sup>17, 36</sup>. Previous studies found that inappropriate IYCF practices were common in  
60

1  
2  
3 many rural areas in China<sup>37, 38</sup>, for instance, complementary foods generally contained  
4 mainly carbohydrates and lacked protein and fat<sup>39</sup>, or were introduced to children too  
5 early or too late, or were given in too small amounts or not frequently enough<sup>40, 41</sup>.  
6  
7  
8  
9

10  
11 The information-motivation-behavior skills (IMB) model indicates that information  
12 can be transformed into action that can motivate individuals and eventually influence  
13 their attitudes and behaviors<sup>42, 43</sup>. In China, information and knowledge about infant  
14 feeding was mainly disseminated through the traditional rural three-tier healthcare  
15 system (county-township-village). Village doctors were responsible to provide face-to-  
16 face infant and young child feeding counseling to caregivers<sup>14, 44</sup>. Our previous study  
17 in Qinghai found that training village doctors to deliver health education information  
18 could be effective in improving caregivers' feeding practice<sup>15</sup>. Therefore, we should  
19 continue making use of the traditional health information dissemination system and  
20 measures need to be taken to further improve the quality of services, for example,  
21 conducting regular refresh training and supervision, providing monetary incentives to  
22 village doctors, and more importantly, tailoring IYCF information to the local feeding  
23 problems and special dietary habits instead of barely giving general knowledge.  
24  
25  
26  
27  
28  
29  
30  
31  
32  
33  
34  
35  
36  
37  
38

## 39 (2) Exploring new channels for delivering IYCF information.

40  
41 Nowadays, mobile phones and the Internet have spread to millions of households in  
42 China. Data showed that, by the end of 2017, there were 1417.49 million mobile  
43 phone users and 772 million Internet users, of which 753 million were smartphone  
44 Internet users. The Internet penetration rate reached 55.8%, of which 35.4% was in  
45 rural areas<sup>19</sup>. Social media and smartphones have become new channels for  
46 information acquisition, and these have been widely used in many health education  
47 researches<sup>45-47</sup>. A systematic review proved the feasibility of delivering eHealth  
48 interventions to improve health literacy skills among people with different health  
49 conditions, risk factors and socio-economic backgrounds<sup>48</sup>. However, using eHealth or  
50 mHealth methods to deliver complementary feeding information in China is rarely  
51  
52  
53  
54  
55  
56  
57  
58  
59  
60

1  
2  
3  
4 reported. Therefore, further studies are needed to assess the feasibility and  
5 effectiveness of such delivery channels in improving IYCF knowledge and practice in  
6 rural China.  
7  
8  
9

### 10 11 (3) Strengthening nutrients supplements (YYB program). 12

13  
14 Nutrients supplements have been commonly accepted as effective interventions in  
15 reducing child anaemia worldwide<sup>15, 49-54</sup>. In China, a domestically produced multi-  
16 nutrient powders (MNPs) for infants and young children called Ying Yang Bao (YYB)  
17 was developed, and a study conducted in Gansu Province from 2001 to 2004 to test  
18 the effectiveness of this complementary food supplement, showed that the use of YYB  
19 could significantly reduce the anaemia prevalence<sup>51</sup>. Our controlled interventional  
20 study in Huzhu and Guinan county from 2012 to 2014 found that the anaemia  
21 prevalence decreased more in the intervention county (receiving YYB) than in the  
22 control county (not receiving YYB, 71.1% to 47.8% vs 86.3% to 75.3%, respectively)<sup>15</sup>.  
23 However, the YYB compliance needs to be improved<sup>55</sup> to further increase the  
24 effectiveness of the interventional program. In addition, the sustainability of the YYB  
25 programs also needs to be evaluated to find constraining factors and solutions since  
26 the anaemia prevalence in Huzhu County went up from 47.8% in 2014 to in 59.1%  
27  
28  
29  
30  
31  
32  
33  
34  
35  
36  
37  
38  
39  
40  
41  
42  
43  
44  
45  
46  
47  
48  
49  
50  
51  
52  
53  
54  
55  
56  
57  
58  
59  
60  
2018.

## 43 44 45 46 47 48 49 50 51 52 53 54 55 56 57 58 59 60

### CONCLUSIONS

46 The anaemia prevalence of children aged 6-23 months in Huzhu County was 59.1%  
47 and children of younger age, Tibetan nationality and not introducing meat were more  
48 likely to be anaemic. 80.9% of children with anaemia were due to iron deficiency, and  
49 20.2% of them suffered from both iron and folic acid deficiencies. Therefore, previous  
50 interventions of feeding counseling and nutrients supplements are appropriate and  
51 should be further strengthened.  
52  
53  
54  
55  
56  
57  
58  
59  
60

### Strengths and limitations of this study

The first strength of our study is that we proved that iron deficiency was the leading cause of anemia for young children in Huzhu county, and therefore confirm the appropriateness of the on-going interventional program. Secondly, we found specific age and ethnic groups of children who were more vulnerable to be anemic, and it implies that the future program implementation should pay more attentions to these groups. In addition, although this study was reported as a cross-sectional survey, we have collected data continuously since 2012, and the rebound of anemia prevalence suggested that sustainability issues of the current programs should be identified and addressed.

Our study has several limitations. Firstly, the study took place only within one rural Chinese county and caution is needed when generalizing the findings from this study to other settings. Secondly, although we surveyed all the eligible children aged 6-23 months and their caregivers in each sampled village, the sample size was still small. Thirdly, we only explored nutritional causes of child anemia, so the anemic causes of for nearly 20% of children were still unknown.

### Acknowledgments

The authors wish to thank all colleagues from the Huzhu Maternal and Child Health and Family Planning Service Center for coordination, logistic arrangements and blood routine tests, and we want to thank all students from Qinghai Institute of Health Sciences for their hard work as interviewers. We are indebted to all the mothers and caregivers who participated in our survey.

### Authorship statement

The study was initiated, conceptualized, and supervised by JSH, SYC and YFZ. LJW, YWH, QW and WW collected and analyzed data. LJW conducted laboratory tests. YFZ, YWH, and QW participated in the explanation and discussion of the results. The



manuscript was drafted by YWH, reviewed and revised by YFZ, QW, SYC and JSH. All authors read and approved the final manuscript.

### Funding

The survey was funded by the United Nations Children's Fund (UNICEF). The founder was involved in study design, data interpretation, preparation of the manuscript, and decision to publish.

### Competing interests

None declared.

### Data showing statement

Additional data can be accessed via the Dryad data repository at <https://datadryad.org/> with the doi: 10.5061/dryad.57v2100

## REFERENCES

1. Stevens GA, Finucane MM, De-Regil LM, Paciorek CJ, Flaxman SR, Branca F, Peña-Rosas JP, Bhutta ZqA, Ezzati M: Global, regional, and national trends in haemoglobin concentration and prevalence of total and severe anaemia in children and pregnant and non-pregnant women for 1995–2011:a systematic analysis of population-representative data. *Lancet Glob Health* 2013, 1:e16-25.
2. Ministry of Health China. People Republic of China. National report on national status of children aged 0-6 year. Beijing: Ministry of China; 2012.
3. Fang HY, Yu DM, Guo QY, Ju LH, Xu XL, Yu WT, Jia FM, Zhao LY: Anaemia prevalence of among 0 – 5 years old children in China, 2013. *Chin J Public Health*. vol. 34; 2018: 1654-1657.
4. Liu S, Li J, Gong CR, Wei CM, Li XZ, Song Y: Prevalence of anaemia among infants and young children in rural areas of Hubei province. *Chin J Public Health* 2013, 30(7):899-902.
5. Yu CY, Ban WF, Xie L, Wei P, Lan S, Q, Shen L, Yang YJ, Wang CB: Prevalence and influence factors of iron deficiency anaemia among 6-23 months old children in Qiannan area of Guizhou province. *Chin J Public Health* 2018, 34(6):812-816.
6. World Health Organization. Iron Deficiency Anaemia Assessment, Prevention and Control. *A Guide for Program Managers*. vol. WHO/NHD/01.3. Geneva, Switerland: World Health Organization; 2001.

- 1
  - 2
  - 3
  - 4
  - 5
  - 6
  - 7
  - 8
  - 9
  - 10
  - 11
  - 12
  - 13
  - 14
  - 15
  - 16
  - 17
  - 18
  - 19
  - 20
  - 21
  - 22
  - 23
  - 24
  - 25
  - 26
  - 27
  - 28
  - 29
  - 30
  - 31
  - 32
  - 33
  - 34
  - 35
  - 36
  - 37
  - 38
  - 39
  - 40
  - 41
  - 42
  - 43
  - 44
  - 45
  - 46
  - 47
  - 48
  - 49
  - 50
  - 51
  - 52
  - 53
  - 54
  - 55
  - 56
  - 57
  - 58
  - 59
  - 60
7. Horton S, Ross J: The economics of iron deficiency. *Food Policy* 2003, 28:51-75.
  8. Tseng PT, Cheng YS, Yen CF, Chen YW, Stubbs B, Whiteley P, Carvalho AF, Li DJ, Chen TY, Yang WC *et al*: Peripheral iron levels in children with attention-deficit hyperactivity disorder: a systematic review and meta-analysis. *Sci Rep* 2018, 8(1):788.
  9. Hergüner S, Keleşoğlu FM, Tanıdır C, Cöpür M: Ferritin and iron levels in children with autistic disorder: Hergüner S, Keleşoğlu FM, Tanıdır C, et al. Ferritin and iron levels in children with autistic disorder. *Eur J Pediatr.* 2012;171(1):143-6.
  10. Pivina L, Semenova Y, Dosa MD, Dauletyarova M, Bjorklund G: Iron Deficiency, Cognitive Functions, and Neurobehavioral Disorders in Children. *J Mol Neurosci* 2019.
  11. Sarah K W, Randi S: Pediatric Screening. *Primary Care: Clinics in Office Practice* 2019, 46(1):69-84.
  12. Colin D. M, Claudia S, Doris MF, Chalapati R, Mie I, Niels T, Christina B, Alan DL, Christopher J.L. M: Global Burden of Disease 2000: Version 2 methods and results. In: *Global Programme on Evidence for Health Policy Discussion Paper* Geneva, Switzerland: World Health Organization; 2002: No 50.
  13. World Health Organization: The Global Burden of Disease - 2004 Update. Geneva: Switzerland: World Health Organization; 2008.
  14. Zhang YF, Wu Q, Wang W, Han HJ, Chen L, Chang SY: Investigation and analysis of infant feeding and nutrition status of 6-23 months Children in rural areas of Qinghai Province. *Maternal and Child Health Care of China* 2016, 31(13):2712-2717.
  15. Zhang YF, Wu Q, Wang W, van Velthoven MH, Chang SY, Han HJ, Xing M, Chen L, Scherpbier RW: Effectiveness of complementary food supplements and dietary counselling on anaemia and stunting in children aged 6-23 months in poor areas of Qinghai Province, China: a controlled interventional study. *BMJ Open* 2016, 6(10):e011234.
  16. World Health Organization: Haemoglobin concentrations for the diagnosis of anaemia and assessment of severity. Geneva: World Health Organization; 2011.
  17. Balarajan Y, Ramakrishnan U, Özaltın E, Shankar AH, Subramanian SV: Anaemia in low-income and middle-income countries. *Lancet* 2011(378):2123-2135.
  18. Qinghai Bureau of Statistics. Qinghai Statistics Year Book 2017. Beijing: China Statistics Press; 2018.
  19. National bureau of Statistics. Statistical Communiqué of the People's Republic of China on 2017 National Economic and Social Development. Beijing: National bureau of Statistics; 2018.
  20. People's Government of Huzhu County. Introduction of Huzhu County. Huzhu County, Qinghai Province. [website in chinese]. Available: <http://www.huzhu.gov.cn/contents/197/9551.html>. Accessed: 5 February 2019.
  21. People's government of Huzhu County. 2017 government report of Huzhu County. Huzhu County, Qinghai Province. [website in chinese]. Available: <http://www.huzhu.gov.cn/contents/211/10406.html>. Accessed: 5 February 2019.
  22. Zhang S, Wu Q, van Velthoven MH, Chen L, Car J, Rudan I, Zhang Y, Li Y, Scherpbier RW: Smartphone versus pen-and-paper data collection of infant feeding practices in rural China. In: *J Med Internet Res.* vol. 14; 2012: e119.
  23. Thurnham DI, McCabe GP, Northrop-Clewes CA, Nestel P: Effects of subclinical infection on plasma retinol concentrations and assessment of prevalence of vitamin A deficiency: meta-analysis. *Thurnham DI, McCabe GP, Northrop Clewes CA, et al Effects of subclinical infection on plasma retinol concentrations and assessment of prevalence of vitamin A deficiency: meta analysis Lancet* 2003, 362(9401):2052-2058.
  24. World Health Organization: Serum ferritin concentrations for the assessment of iron status and

- 1  
2  
3 iron deficiency in populations. *Vitamin and Mineral Nutrition Information*  
4 *System*(WHO/NMH/NHD/MNM/11.2). Geneva: World Health Organization; 2011.
- 5  
6 25. World Health Organization: Serum and red blood cell folic acid concentrations for assessing folic  
7 acid status in populations. *Vitamin and Mineral Nutrition Information System*. Geneva: World  
8 Health Organization; 2015.
- 9  
10 26. Engle-Stone R, Williams TN, Nankap M, Ndjebayi A, Gimou MM, Oyono Y, Tarini A, Brown KH,  
11 Green R: Prevalence of Inherited Hemoglobin Disorders and Relationships with Anaemia and  
12 Micronutrient Status among Children in Yaounde and Douala, Cameroon. *Nutrients* 2017, 9(7).
- 13  
14 27. Cook JD, Flowers CH, Skikne BS: The quantitative assessment of body iron. *blood* 2003,  
15 101(9):3359-3364.
- 16  
17 28. Pfeiffer CM, Cook JD, Mei Z, Cogswell ME, Looker AC, Lacher DA: Evaluation of an automated  
18 soluble transferrin receptor (sTfR) assay on the Roche Hitachi analyzer and its comparison to two  
19 ELISA assays. *Clin Chim Acta* 2007, 382(1-2):112-116.
- 20  
21 29. Wu Q, van Velthoven MH, Chen L, Car J, Rudan D, Saftić V, Zhang YF, Li Y, Scherpbier RW: Improving  
22 the intake of nutritious food in children aged 6-23 months in Wuyi County, China – a multi-method  
23 approach. *Croatian Medical Journal* 2013, 54(2):157-170.
- 24  
25 30. Dang S, Yan H, Yamamoto S, Wang X, Zeng L: Feeding practice among younger Tibetan children  
26 living at high altitudes. *Eur J Clin Nutr* 2005, 59(9):1022-1029.
- 27  
28 31. Xing Y, Yan H, Dang S: Survey on feeding knowledge and behavior of Tibetan infant mothers in rural  
29 Lhasa *Chinese Public Health* 2010, 26(8):945-946.
- 30  
31 32. Zhang Y, Feng G, Zhang Y: Survey on feeding and growth of Hui and Tibetan children under 5 years  
32 old in Gansu Province *Medicine and Society* 2009, 22(11):37-39.
- 33  
34 33. McLean E, Cogswell M, Egli I, Wojdyla D, de Benoist B: Worldwide prevalence of anaemia, WHO  
35 Vitamin and Mineral Nutrition Information System, 1993-2005. *Public Health Nutr* 2009, 12(4):444-  
36 454.
- 37  
38 34. DeLoughery TG: Microcytic anaemia. *N Engl J Med* 2014, 371(14):1324-1331.
- 39  
40 35. DeMaeyer EM, Dallman P, Gurney JM, L.Hallberg, Sood SK, Srikantia SG: Preventing and  
41 Controlling Iron Deficiency Anaemia through Primary Health Care--A guide for health  
42 administrators and programme managers. In. Geneva, Switzerland: World Health Organization  
43 1989.
- 44  
45 36. McDonald SJ, Middleton P, Dowswell T, Morris PS: Effect of timing of umbilical cord clamping of  
46 term infants on maternal and neonatal outcomes (Review). *The Cochrane Collaboration* 2014,  
47 9(2):303-397.
- 48  
49 37. Chang SY, Chen CM, He W, Wang YY: Analysis on the changes of nutritional status in China - the  
50 improvement of complementary feeding among Chinese infants and young children. *Wei Sheng Yan*  
51 *Jiu* 2007(36):19-20.
- 52  
53 38. Wang XL, Hojer B, Guo SF, Luo SS, Zhou WY, Wang Y: Stunting and 'overweight' in the WHO Child  
54 Growth Standards – malnutrition among children in a poor area of China. *Public Health Nutrition*  
55 2009, 12(11):1991-1998.
- 56  
57 39. Chang CM: Fat intake and nutritional status of children in China. *The American Journal of Clinical*  
58 *Nutrition* 2000, 72(5):1368s-1372s.
- 59  
60 40. Chen CM, He W, Chang SY: The changes of the attributable factors of child growth. *Wei Sheng Yan*  
*Jiu* 2006(35):765-768.
41. Wang XL, Chu KY, Wang Y: Analysis of current situation of breastfeeding and complementary

- 1  
2  
3 feeding of children aged under 2 years in 105 maternal and child health cooperative project  
4 counties. *Chin J Child Health Care* 2000(18):144-146.
- 5  
6 42. Jeffrey DF, William AF: Changing AIDS-risk behavior. *Psychological Bulletin* 1992, 111(3):455-474.
- 7  
8 43. Jacobs RJ, Caballero J, Ownby RL, Kane MN: Development of a culturally appropriate computer-  
9 delivered tailored internet-based health literacy intervention for spanish-dominant hispanics living  
10 with HIV. *BMC Medical Informatics and Decision Making* 2014, 14(1):103.
- 11  
12 44. Wu Q, Zhang YF, Chang SY, Wang W, van Velthoven MH, Han HJ, Xing M, Chen L, Du X, Scherpbier  
13 RW: Monitoring and evaluating the adherence to a complementary food supplement (Ying Yang  
14 Bao) among young children in rural Qinghai, China: a mixed methods evaluation study. *J Glob  
15 Health* 2017, 7(1):011101.
- 16  
17 45. Pander T, Pinilla S, Dimitriadis K, Fischer MR: The use of Facebook in medical education--a literature  
18 review. *GMS Z Med Ausbild.* vol. 31; 2014: Doc33.
- 19  
20 46. He C, Wu S, Zhao Y, Li Z, Zhang Y, Le J, Wang L, Wan S, Li C, Li Y *et al*: Social Media-Promoted Weight  
21 Loss Among an Occupational Population: Cohort Study Using a WeChat Mobile Phone App-Based  
22 Campaign: He C, Wu S, Zhao Y, et al. Social Media-Promoted Weight Loss Among an Occupational  
23 Population: Cohort Study Using a WeChat Mobile Phone App-Based Campaign. *J Med Internet Res.*  
24 2017;19(10)e357.
- 25  
26 47. Li W, Han LQ, Guo YJ, Sun J: Using WeChat official accounts to improve malaria health literacy  
27 among Chinese expatriates in Niger: an intervention study: Li W, Han LQ, Guo YJ, et al. *Malar J.*  
28 2016;15(1)567.
- 29  
30 48. Jacobs RJ, Lou JQ, Ownby RL, Caballero J: A systematic review of eHealth interventions to improve  
31 health literacy: Jacobs RJ, Lou JQ, Ownby RL, et al. A systematic review of eHealth interventions to  
32 improve health literacy. *Health Informatics J.* 2016;22(2)81-98.
- 33  
34 49. Huo JS, Sun J, Fang Z, Chang SY, Zhao L, Fu P, Wang J, Huang J, Wang L, Begin F *et al*: Effect of home-  
35 based complementary food fortification on prevalence of anaemia among infants and young  
36 children aged 6 to 23 months in poor rural regions of China. *Food and Nutrition Bulletin* 2015,  
37 36(4):405-414.
- 38  
39 50. Wang J, Chang SY, Zhao L, Yu W, Zhang J, Man Q, He L, Duan Y, Wang H, Scherpbier R *et al*:  
40 Effectiveness of community-based complementary food supplement (Yingyangbao) distribution in  
41 children aged 6-23 months in poor areas in China. *PLoS One* 2017, 12(3):e0174302.
- 42  
43 51. Wang Y, Chen C, Wang F, Jia M, Wang K: Effects of nutrient fortified complementary food  
44 supplements on anaemia of infants and young children in poor rural of Gansu. *Biomedical and  
45 Environmental Sciences* 2009, 22(3):194-200.
- 46  
47 52. Zulfiqar AB, Jai KD, Arjumand R, Michelle FG, Neff W, Susan H, Patrick W, Anna L, Robert EB:  
48 Evidence-based interventions for improvement of maternal and child nutrition: what can be done  
49 and at what cost? *Lancet* 2013, 382(9890):452-477.
- 50  
51 53. De-Regil LM, Suchdev PS, Vist GE, Walleser S, Pena-Rosas JP: Home fortification of foods with  
52 multiple micronutrient powders for health and nutrition in children under two years of age  
53 (Review). *Evid Based Child Health* 2013, 8(1):112-201.
- 54  
55 54. Suchdev PS, Ruth LJ, Woodruff BA, Mbakaya C, Mandava U, Flores-Ayala R, Jefferds MED: Selling  
56 Sprinkles micronutrient powder reduces anaemia, iron deficiency, and vitamin A deficiency in  
57 young children in Western Kenya: a cluster-randomized controlled trial. *The American Journal of  
58 Clinical Nutrition* 2012, 95(5):1223-1230.
- 59  
60 55. Wang J, Chang SY, Zhao L, Yu W, Zhang J, Man Q, He L, Duan Y, Wang H, Scherpbier R *et al*:

Effectiveness of community-based complementary food supplement (Yingyangbao) distribution in children aged 6-23 months in poor areas in China. *PLoS One* 2017, 12(3).

### Figure legends

Figure 1 Flowchart of study procedures

Figure 2 Causes of anaemia

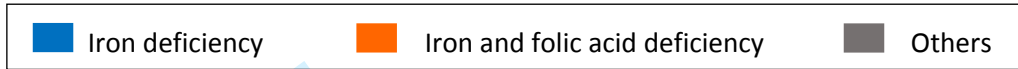

For peer review only

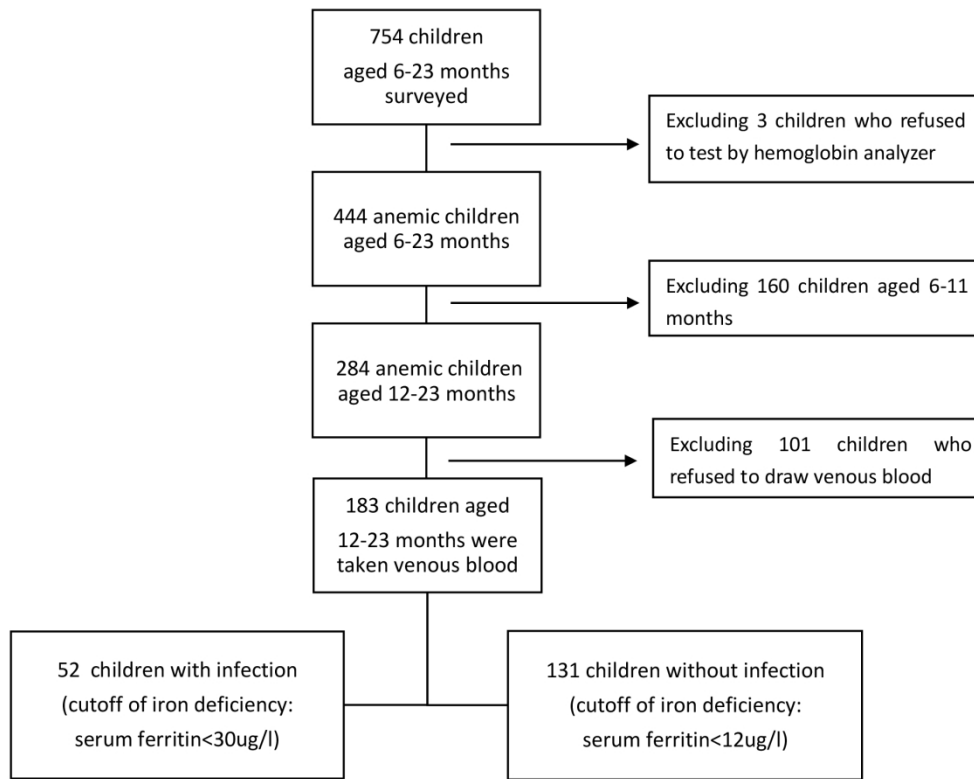

Flowchart of study procedures

1  
2  
3  
4  
5  
6  
7  
8  
9  
10  
11  
12  
13  
14  
15  
16  
17  
18  
19  
20  
21  
22  
23  
24  
25  
26  
27  
28  
29  
30  
31  
32  
33  
34  
35  
36  
37  
38  
39  
40  
41  
42  
43  
44  
45  
46  
47  
48  
49  
50  
51  
52  
53  
54  
55  
56  
57  
58  
59  
60

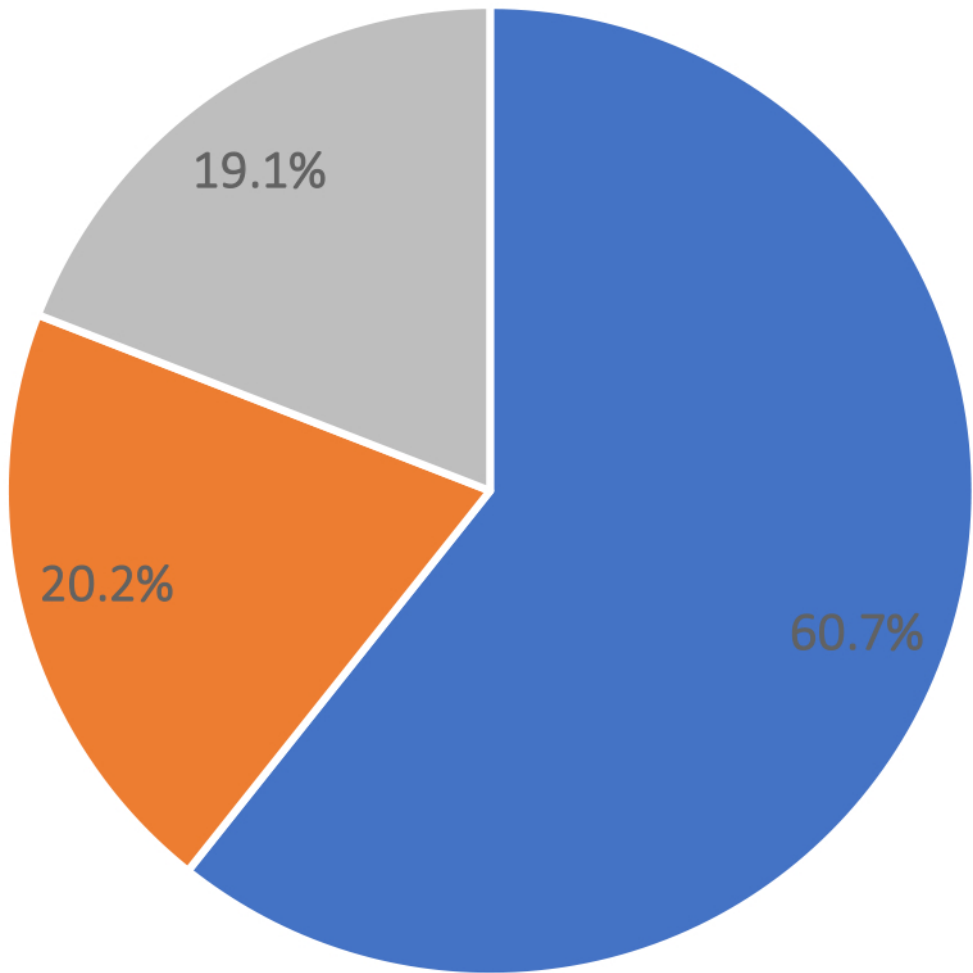

causes of anaemia

**STROBE 2007 (v4) Statement—Checklist of items that should be included in reports of *cross-sectional studies***

| Section/Topic                | Item # | Recommendation                                                                                                                                                                       | Reported on page # |
|------------------------------|--------|--------------------------------------------------------------------------------------------------------------------------------------------------------------------------------------|--------------------|
| <b>Title and abstract</b>    | 1      | (a) Indicate the study's design with a commonly used term in the title or the abstract                                                                                               | 1                  |
|                              |        | (b) Provide in the abstract an informative and balanced summary of what was done and what was found                                                                                  | 3-4                |
| <b>Introduction</b>          |        |                                                                                                                                                                                      |                    |
| Background/rationale         | 2      | Explain the scientific background and rationale for the investigation being reported                                                                                                 | 4-6                |
| Objectives                   | 3      | State specific objectives, including any prespecified hypotheses                                                                                                                     | 6                  |
| <b>Methods</b>               |        |                                                                                                                                                                                      |                    |
| Study design                 | 4      | Present key elements of study design early in the paper                                                                                                                              | 6-7                |
| Setting                      | 5      | Describe the setting, locations, and relevant dates, including periods of recruitment, exposure, follow-up, and data collection                                                      | 7                  |
| Participants                 | 6      | (a) Give the eligibility criteria, and the sources and methods of selection of participants                                                                                          | 7                  |
| Variables                    | 7      | Clearly define all outcomes, exposures, predictors, potential confounders, and effect modifiers. Give diagnostic criteria, if applicable                                             | 11                 |
| Data sources/<br>measurement | 8*     | For each variable of interest, give sources of data and details of methods of assessment (measurement). Describe comparability of assessment methods if there is more than one group | 9-10               |
| Bias                         | 9      | Describe any efforts to address potential sources of bias                                                                                                                            | 8-10               |
| Study size                   | 10     | Explain how the study size was arrived at                                                                                                                                            | 8                  |
| Quantitative variables       | 11     | Explain how quantitative variables were handled in the analyses. If applicable, describe which groupings were chosen and why                                                         | N/A                |
| Statistical methods          | 12     | (a) Describe all statistical methods, including those used to control for confounding                                                                                                | 10-11              |
|                              |        | (b) Describe any methods used to examine subgroups and interactions                                                                                                                  | N/A                |
|                              |        | (c) Explain how missing data were addressed                                                                                                                                          | 10-11              |
|                              |        | (d) If applicable, describe analytical methods taking account of sampling strategy                                                                                                   | 10-11              |
|                              |        | (e) Describe any sensitivity analyses                                                                                                                                                | N/A                |
| <b>Results</b>               |        |                                                                                                                                                                                      |                    |



|                          |     |                                                                                                                                                                                                              |       |
|--------------------------|-----|--------------------------------------------------------------------------------------------------------------------------------------------------------------------------------------------------------------|-------|
| Participants             | 13* | (a) Report numbers of individuals at each stage of study—eg numbers potentially eligible, examined for eligibility, confirmed eligible, included in the study, completing follow-up, and analysed            | 12;27 |
|                          |     | (b) Give reasons for non-participation at each stage                                                                                                                                                         | N/A   |
|                          |     | (c) Consider use of a flow diagram                                                                                                                                                                           | 27    |
| Descriptive data         | 14* | (a) Give characteristics of study participants (eg demographic, clinical, social) and information on exposures and potential confounders                                                                     | 12-13 |
|                          |     | (b) Indicate number of participants with missing data for each variable of interest                                                                                                                          | 14    |
| Outcome data             | 15* | Report numbers of outcome events or summary measures                                                                                                                                                         | 15-16 |
| Main results             | 16  | (a) Give unadjusted estimates and, if applicable, confounder-adjusted estimates and their precision (eg, 95% confidence interval). Make clear which confounders were adjusted for and why they were included | N/A   |
|                          |     | (b) Report category boundaries when continuous variables were categorized                                                                                                                                    | 12-14 |
|                          |     | (c) If relevant, consider translating estimates of relative risk into absolute risk for a meaningful time period                                                                                             | N/A   |
| Other analyses           | 17  | Report other analyses done—eg analyses of subgroups and interactions, and sensitivity analyses                                                                                                               | N/A   |
| <b>Discussion</b>        |     |                                                                                                                                                                                                              |       |
| Key results              | 18  | Summarise key results with reference to study objectives                                                                                                                                                     | 17    |
| Limitations              | 19  | Discuss limitations of the study, taking into account sources of potential bias or imprecision. Discuss both direction and magnitude of any potential bias                                                   | 21-22 |
| Interpretation           | 20  | Give a cautious overall interpretation of results considering objectives, limitations, multiplicity of analyses, results from similar studies, and other relevant evidence                                   | 17-21 |
| Generalisability         | 21  | Discuss the generalisability (external validity) of the study results                                                                                                                                        | 21-22 |
| <b>Other information</b> |     |                                                                                                                                                                                                              |       |
| Funding                  | 22  | Give the source of funding and the role of the funders for the present study and, if applicable, for the original study on which the present article is based                                                | 22    |

\*Give information separately for cases and controls in case-control studies and, if applicable, for exposed and unexposed groups in cohort and cross-sectional studies.

**Note:** An Explanation and Elaboration article discusses each checklist item and gives methodological background and published examples of transparent reporting. The STROBE checklist is best used in conjunction with this article (freely available on the Web sites of PLoS Medicine at <http://www.plosmedicine.org/>, Annals of Internal Medicine at <http://www.annals.org/>, and Epidemiology at <http://www.epidem.com/>). Information on the STROBE Initiative is available at [www.strobe-statement.org](http://www.strobe-statement.org).

# BMJ Open

## Prevalence and causes of anaemia in children aged 6-23 months in rural Qinghai, China: findings from a cross-sectional study

|                                 |                                                                                                                                                                                                                                                                                                                                                                                                                                                                                                                                                                                                                                                                                                                                               |
|---------------------------------|-----------------------------------------------------------------------------------------------------------------------------------------------------------------------------------------------------------------------------------------------------------------------------------------------------------------------------------------------------------------------------------------------------------------------------------------------------------------------------------------------------------------------------------------------------------------------------------------------------------------------------------------------------------------------------------------------------------------------------------------------|
| Journal:                        | <i>BMJ Open</i>                                                                                                                                                                                                                                                                                                                                                                                                                                                                                                                                                                                                                                                                                                                               |
| Manuscript ID                   | bmjopen-2019-031021.R1                                                                                                                                                                                                                                                                                                                                                                                                                                                                                                                                                                                                                                                                                                                        |
| Article Type:                   | Research                                                                                                                                                                                                                                                                                                                                                                                                                                                                                                                                                                                                                                                                                                                                      |
| Date Submitted by the Author:   | 23-Jun-2019                                                                                                                                                                                                                                                                                                                                                                                                                                                                                                                                                                                                                                                                                                                                   |
| Complete List of Authors:       | Huang, Yiwen; Capital Institute of Pediatrics, Department of Integrated Early Childhood Development<br>Wang, Lijuan; Chinese Center for Disease Control and Prevention National Institute for Nutrition and Health<br>Huo, Junsheng; Chinese Center for Disease Control and Prevention National Institute for Nutrition and Health<br>Wu, Qiong; Capital Institute of Pediatrics, Department of Integrated Early Childhood Development<br>Wang, Wei; Capital Institute of Pediatrics, Department of Integrated Early Childhood Development<br>Chang, Suying; UNICEF, Health and Nutrition, Water, Environment and Sanitation Section<br>Zhang, Yanfeng; Capital Institute of Pediatrics, Department of Integrated Early Childhood Development |
| <b>Primary Subject Heading</b>: | Nutrition and metabolism                                                                                                                                                                                                                                                                                                                                                                                                                                                                                                                                                                                                                                                                                                                      |
| Secondary Subject Heading:      | Nutrition and metabolism, Public health, Epidemiology                                                                                                                                                                                                                                                                                                                                                                                                                                                                                                                                                                                                                                                                                         |
| Keywords:                       | Anaemia < HAEMATOLOGY, Nutrition < TROPICAL MEDICINE, iron deficiency, children, China                                                                                                                                                                                                                                                                                                                                                                                                                                                                                                                                                                                                                                                        |
|                                 |                                                                                                                                                                                                                                                                                                                                                                                                                                                                                                                                                                                                                                                                                                                                               |

SCHOLARONE™  
Manuscripts

**ORIGINAL ARTICLE****Title page****Prevalence and causes of anaemia in children aged 6-23 months in rural Qinghai,****China: findings from a cross-sectional study**

Yiwen Huang<sup>1\*</sup>, B.Sci; Lijuan Wang<sup>2\*</sup>, PhD; Junsheng Huo<sup>2</sup>, PhD; Qiong Wu<sup>1</sup>, MSc; Wei Wang<sup>1</sup>, MSc; Suying Chang<sup>3</sup>, PhD; Yanfeng Zhang<sup>1</sup>, MSc

<sup>1</sup>Department of Integrated Early Childhood Development, Capital Institute of Pediatrics, Beijing, China

<sup>2</sup>Institute for Nutrition and Health, Chinese Center for Disease Control and Prevention, Beijing, China

<sup>3</sup>Health and Nutrition, Water, Environment and Sanitation Section, UNICEF China, Beijing, China

\*These authors contribute equally to this paper.

**Corresponding Author:**

Suying Chang, PhD

Health and Nutrition, Water, Environment and Sanitation Section, UNICEF China, Beijing, China

Address: 12, Sanlitun Lu, Beijing, 100600, P.R. China.

Phone: 8610 85312678

Fax: 8610 65323107

1  
2  
3  
4 Email: [schang@unicef.org](mailto:schang@unicef.org)  
5  
6  
7

8 Yanfeng Zhang, MSc  
9

10 Department of Integrated Early Childhood Development, Capital Institute of Pediatrics,  
11  
12 Beijing, China.  
13

14 Address: No. 2 Yabao Road, Chaoyang District, Beijing, 100020, P.R. China.  
15

16  
17 Phone: 8610 85695554  
18

19 Fax: 8610 85622025  
20

21 Email: [summyzh@126.com](mailto:summyzh@126.com)  
22  
23

24 **Key words:**

25  
26 Anaemia; iron deficiency; nutrition; children; China  
27  
28

29 **Word count:**

30  
31 4519  
32  
33  
34  
35  
36  
37  
38  
39  
40  
41  
42  
43  
44  
45  
46  
47  
48  
49  
50  
51  
52  
53  
54  
55  
56  
57  
58  
59  
60

## ABSTRACT

**Objective:** To investigate the current situation of anaemia among children aged 6-23 months in a rural county in China, and to explore the influencing factors and the main causes of anaemia.

**Design:** A cross-sectional study.

**Setting:** Huzhu County in Qinghai Province, China

**Participants:** We selected 38 sampled villages using Proportional to Population Size sampling method. We obtained the name list of children aged 6-23 months in each sampled village and planned to survey all the eligible children aged 6-23 months and their caregivers.

**Primary and secondary outcomes measures:** The prevalence of anaemia, the influencing factors of anaemia, the laboratory tests for biological causes of anaemia, including serum ferritin, sTfR, folic acid, Homocysteine and Vitamin B12.

**Results:** A total of 754 children aged 6-23 months and their caregivers were surveyed, and 183 anaemic children aged 12-23 months were collected venous blood sample. The anaemia prevalence of children aged 6-23 months in Huzhu County was 59.1%. Children of younger age (OR=0.968, 95%CI 0.940, 0.998), Tibetan nationality (OR=3.123, 95%CI 1.473,6.623) and not introducing meat (OR=0.698, 95%CI 0.499,0.976) were more likely to be anaemic. More than 80% of children with anaemia were due to iron deficiency, and 20.2% of them had both iron and folic acid deficiencies.

1  
2  
3  
4 **Conclusions:** The anaemia prevalence of children aged 6-23 months in Huzhu County  
5 was high and children of younger age, Tibetan nationality and not introducing meat  
6 were more likely to be anaemic. The main cause of anaemia was nutritional anaemia,  
7 with the vast majority being iron deficiency. Interventions of feeding counseling and  
8 nutrients supplements are appropriate and should be further strengthened.  
9  
10  
11  
12

13  
14  
15 **Strengths and limitations of this study:** The first strength was that we proved that  
16 iron deficiency was the leading biological cause of anaemia for young children in  
17 Huzhu County. Secondly, we identified specific age and ethnic groups of children who  
18 were more vulnerable to be anaemic.. Our study also has several limitations. Firstly,  
19 the study took place only within one rural Chinese county and caution is needed when  
20 generalizing the findings from this study to other settings. Secondly, the sample size  
21 was small.  
22  
23  
24  
25  
26  
27  
28  
29  
30

31 **Trial registration number:** ChiCTRPRC12002444 (Feb 15th, 2016; Version1).  
32  
33  
34

## 35 Main text

36  
37  
38  
39

## 40 INTRODUCTION

41  
42 Childhood anaemia has long been a major public health problem worldwide. A  
43 systematic analysis of population-representative data suggested that anaemia  
44 prevalence in children younger than 5 years was 43% and there were 273 million  
45 children with anaemia globally in 2011<sup>1</sup>. The national anaemia prevalence in children  
46 under 5 in China fluctuated between 12% and 23% between 1990 and 2005 and then  
47 decreased from 19.3% in 2005 to 12.6% in 2010<sup>2</sup>. National Nutrition and Health  
48 Surveillance in 2013 showed that the prevalence of anaemia among children aged 0-  
49 5 years was 11.6% across the country, 10.6% in urban areas and 12.4% in rural areas  
50 respectively. However, huge regional differences exist, with rural Qinghai province  
51  
52  
53  
54  
55  
56  
57  
58  
59  
60

1  
2  
3  
4 being the highest (27.5%)<sup>3</sup>. In some rural areas, anaemia prevalence in children aged  
5 6-23 months was higher than 30%<sup>4,5</sup>.  
6  
7

8  
9 In the public health perspective, anaemia is defined by the World Health Organization  
10 as a hemoglobin concentration 2 SDs below the mean hemoglobin concentration for  
11 a normal population of the same gender and the same age group<sup>6</sup>. Anaemia has  
12 irreversible adverse effects on childhood growth and development, even their  
13 working abilities in adulthood<sup>7</sup>. Many studies suggested an association between  
14 anaemia and impaired psychomotor development; impaired cognitive functions such  
15 as concentration, intellectual status, memory and scholastic skills; psychological and  
16 behavioral disorders such as attention-deficit/hyperactivity disorder (ADHD)<sup>8</sup> and  
17 autism spectrum disorder (ASD)<sup>9</sup>; decreased physical activity<sup>10</sup>. Meanwhile, anaemia  
18 has been confirmed to be associated with impaired renal function, increased  
19 absorption of lead, and impaired immunity<sup>11</sup>. The Global Burden of Disease (GBD)  
20 2000 report estimated that anaemia resulted in 68.4 million years lived with disability  
21 (YLD), accounting for 8.8% the total number of all cases of disability<sup>12</sup>, and the GBD  
22 2004 update had similar findings, which exerted a substantial economic burden<sup>13</sup>.  
23  
24  
25  
26  
27  
28  
29  
30  
31  
32  
33  
34  
35  
36  
37  
38

39 Our previous study in Qinghai Province found that the prevalence of anaemia in rural  
40 areas was much higher than the national average level. In 2012, the prevalence of  
41 anaemia among children aged 6-23 months in Huzhu, Minhe and Guinan County was  
42 71.1%, 56.1% and 86.3%, respectively<sup>14</sup>. We carried out a controlled interventional  
43 study in Huzhu and Guinan county from 2012 to 2014. And all children aged 6-23  
44 months in the intervention county, Huzhu County, received YingYangBao (a  
45 domestically produced multiple micronutrient powders for infants and young children)  
46 and their caregivers received infant feeding counseling from trained village doctors.  
47 The study found that the anaemia prevalence significantly decreased from 71.1% to  
48 47.8% in Huzhu County<sup>15</sup>. WHO defines the prevalence of anaemia in the population  
49 less than 20% as a mild public health problem, 20% to 40% as a moderate public health  
50  
51  
52  
53  
54  
55  
56  
57  
58  
59  
60

1  
2  
3  
4 problem, and the prevalence of anaemia in the population  $\geq 40\%$  as a serious public  
5 health problem<sup>16</sup>. Therefore, childhood anaemia in Huzhu County is still a serious  
6 public health problem in spite of the dramatic reduction of anaemia prevalence after  
7 the study, and more efforts are needed to further decrease anaemia prevalence and  
8 improve the nutrition status of children.  
9  
10  
11  
12

13  
14  
15 There are many reasons for anaemia: acute and chronic infections that result in  
16 inflammation (including chronic blood loss caused by hookworm infection or  
17 schistosomiasis); nutritional anaemia caused by iron deficiency and other  
18 micronutrient deficiencies, especially of folic acid, vitamin B12 and vitamin A; and  
19 genetically inherited traits such as thalassemia<sup>17</sup>. Although it is generally accepted  
20 that nutrients deficiency is the leading cause of child anaemia, proportions of anaemic  
21 causes in specific areas are usually unknown. Since interventions based on  
22 improvement of child feeding and nutrients supplements are only effective for  
23 nutritional anaemia, understanding the status of anaemia-related nutrients (iron, folic  
24 acid and vitamin B12) is crucial to estimate the potential effectiveness of nutritional  
25 interventions. The purpose of this study is to investigate the current situation of  
26 anaemia among children aged 6-23 months in Huzhu County, and to explore the  
27 influencing factors and the main causes of anaemia, so as to develop more appropriate  
28 strategies for combating this intractable public health issue.  
29  
30  
31  
32  
33  
34  
35  
36  
37  
38  
39  
40  
41  
42  
43  
44

## 45 **METHODS**

### 46 **Study design**

47  
48 This study was conducted as a cross-sectional survey of children aged 6-23 months  
49 and their caregivers in Huzhu County, Qinghai province. Proportional to Population  
50 Size (PPS) sampling method was used to select sampled villages in the county. We first  
51 obtained the name list of children aged 6-23 months in each sampled village and  
52 aimed to survey all the eligible children aged 6-23 months and their caregivers. The  
53 HemoCue Hb 301 analyzer (HemoCue, Lake Forest, CA, USA) was used to collect  
54  
55  
56  
57  
58  
59  
60



1  
2  
3  
4 children's fingertip peripheral blood by using microcuvettes (for blood samples) to  
5 detect hemoglobin levels of children in the all sampled villages. After 4-7 days,  
6 anaemic children screened out by HemoCue Hb 301 analyzer were called to Huzhu  
7 Maternal and Child Health and Family Planning Service Center to draw venous blood  
8 sample for further blood routine test and laboratory tests.  
9  
10  
11  
12  
13  
14

### 15 **Study setting**

16  
17 Qinghai Province lies in northwest China, with an area of around 720,000 km<sup>2</sup>. By the  
18 end of 2017, the resident population of the province was 5,838,000, of which the  
19 resident population of rural areas was 2,808,400, accounting for 46.9%, and the ethnic  
20 minority population was 2,854,900, accounting for 47.7%. Qinghai Province has 34  
21 counties and 439 townships. The Qinghai resident per capita disposable income in  
22 2017 was ¥9,462 (US\$1363.13)<sup>18</sup> for rural people, which was far lower than the  
23 national level (¥13,432(US\$1935.06))<sup>19</sup>.  
24  
25  
26  
27  
28  
29  
30  
31  
32

33 Huzhu County is located in the northeastern part of Qinghai Province and 27.9% of its  
34 population is part of an ethnic minority, which includes Tu, Tibetan, Hui and other 28  
35 ethnic minorities<sup>20</sup>. Huzhu County covers an area of 3,424 km<sup>2</sup>. The county governs  
36 19 townships with 294 villages, with a total population of 401,540, of which the rural  
37 population accounted for 76.0%. By the end of 2017, the resident per capita  
38 disposable income in the rural area was ¥9810 (US\$1414.91)<sup>21</sup>.  
39  
40  
41  
42  
43  
44  
45  
46  
47

### 48 **Participants**

49 Children aged 6-23 months and their caregivers were invited to participate in this  
50 survey. We excluded children with a structural or genetic birth defect such as neural  
51 tube defects, congenital heart disease or phenylketonuria or caregivers who refused  
52 to participate.  
53  
54  
55  
56  
57

### 58 **Survey instrument**

1  
2  
3  
4 We used the adapted WHO Maternal, Newborn and Child Health Household Survey  
5 (MNCH HHS, unpublished, 2009) to collect household information and infant feeding  
6 practices in each sampled village.  
7  
8  
9

### 10 **Sample size and Sampling**

11  
12 The sample size required were calculated based upon estimated anaemia prevalence  
13 in Huzhu County. We used the sample size calculation for proportion in single cross-  
14 sectional survey to estimate the sample for our study. Based on 35% of expected  
15 anaemia prevalence for children aged 6-23 months in Huzhu County, 5% of desired  
16 absolute precision, and 2 of design effect, we calculated the sample size of 699.  
17  
18 Meanwhile, we also expected to draw 200 venous blood sample of anaemic children  
19 aged 12-23 months. According to the estimated anaemia prevalence of 35% in Huzhu  
20 County, we calculated that the total number of children aged 12-23 months needed  
21 was 571. We assumed that the number of children equally distributed in three age  
22 groups (6-11 months, 12-17 months, and 18-23 months), and calculated that 285  
23 children aged 6-11 months were needed. Hence a sample size of 856 children aged 6-  
24 23 months was used in this study.  
25  
26  
27  
28  
29  
30  
31  
32  
33  
34  
35  
36  
37  
38

39 We knew the average number of children aged 6-23 months in each villages of Huzhu  
40 County from the local Maternal and Child Health Family Planning Service Centre.  
41 Proportional to Population Size (PPS) sampling method was used to select 38 sampled  
42 villages to meet our sample size requirements in the county. We obtained the name  
43 list of children aged 6-23 months in each sampled village and planned to survey all the  
44 eligible children and their caregivers.  
45  
46  
47  
48  
49  
50  
51

### 52 **Training of Interviewers**

53  
54 Staff from the Capital Institute of Pediatrics in Beijing were supervisors for this survey,  
55 and 25 students were recruited from Qinghai Institute of Health Sciences as  
56 interviewers. We provided them training for two days before fieldwork, which  
57  
58  
59  
60

1  
2  
3 included communication skills, explanation of questionnaires, demonstration, role  
4 plays, field practice, and group discussions. In addition, 4 of them were trained on  
5 measuring hemoglobin levels with a HemoCue Hb 301 analyzer. After the training, a  
6 half-day field practice was held in a village clinic. Any problems arising during the field  
7 practice were discussed and solved directly.  
8  
9  
10  
11  
12

### 13 14 15 **Data collection**

16  
17 We carried out the survey from July 23th to 27th 2018. In every surveyed township,  
18 staff notified the village doctors of the sample villages in advance, then the village  
19 doctor called the caregivers to take their children to the village clinic for investigation.  
20 Firstly, interviewers introduced the aim of the survey to the mothers or other  
21 caregivers and obtained written informed consent from them. Then the interviewers  
22 questioned them following the instructions.  
23  
24  
25  
26  
27  
28  
29

30  
31 We used smartphones with the household survey questionnaire set up in specially  
32 developed software to record data <sup>22</sup>. Four teams of interviewers carried out the  
33 survey, with 6 surveyors and 1 supervisor in each team. Data for each questionnaire  
34 were uploaded into an Excel database via the Internet server. Once the interview was  
35 completed, the special surveyor in each team measured hemoglobin with a HemoCue  
36 Hb 301 analyzer (HemoCue, Lake Forest, CA) by drawing around 10 ul finger blood.  
37  
38  
39  
40  
41  
42  
43

44  
45 Children aged 12-23 months screened as anaemia by HemoCue Hb 301 analyzer were  
46 informed to go to the Huzhu County Maternal and Child Health Family Planning Service  
47 Centre for further tests from July 31 to August 1 2018. About 4-5ml venous blood of  
48 each children were collected by experienced nurses and placed into two tubes. The  
49 first 1-2ml blood sample was collected into a labeled EDTA-K2 coated tube for blood  
50 routine test using whole blood. And the second 3ml blood sample was collected  
51 (without removing the needle) into a labeled vacuum separating tube for serum  
52 ferritin(SF), soluble transferrin receptor(sTfR), C-reactive protein(CRP),  $\alpha$ -1 acid  
53  
54  
55  
56  
57  
58  
59  
60

glycoprotein(AGP), vitamin B12, Homocysteine(HCY), and folic acid concentration using serum.

Blood routine test and blood centrifugation were completed in the local laboratory. The blood sample in labeled vacuum separating tubes were placed for 30 minutes, then were centrifuged at 1500 turn/minute for 15 minutes. The serum was separated into 1, 2 and 3 cryotubes using disposable pipettes.

After the field work, all the blood samples were immediately stored at -70 °C and transported as soon as possible to Nutritional Institute for Institute for Nutrition and Health, China Center for Disease Control and Prevention for further laboratory testing. Repeated freezing and thawing were strictly avoided during transportation and storage.

### **Laboratory analysis**

The blood routine test was conducted using automatic blood cell analyzer (Horiba, ABX Micros 60-OT, France) in local laboratory. SF, vitamin B12 and serum folic acid were analyzed by Roche Cobas e601 analyzer (Germany) using electrochemiluminescence immunoassay (ECLIA). sTfR, CRP, AGP were analyzed by Hitachi 7600-110 chemistry autoanalyzer (Japan) using immunoturbidimetry and HCY was analyzed by Hitachi 7600-110 chemistry autoanalyzer (Japan) using enzymatic cycling assay.

### **Data management and statistical analysis**

Data of questionnaires were automatically transformed and pooled into a Microsoft Excel sheet. After the data cleaning, we converted the database into a database file (dbf) for the final analysis.

We carried out statistical analysis with SAS 9.2 for Windows. The median (Q1, Q3) was

1  
2  
3  
4 used to describe the age in years of mothers and grandparents of children. Mean and  
5 standard deviation (SD) was used to describe the values of serum ferritin and body  
6 iron. Percentages were presented in binary or categorical variables. We used the  
7 Pearson  $\chi^2$ -test and Fisher exact test to compare binary and categorical variables.  
8  
9

10  
11  
12  
13 Moreover, we carried out a logistic regression analysis to identify factors associated  
14 with children's anaemia in this survey. All relevant factors were first selected by  
15 univariate logistic analysis, including child's age, child's sex, parents' age, parents'  
16 nationality, parents' education, parents' job, whether parent worked outside the  
17 county, whether children aged 6-23 months had been given iron-rich or iron-fortified  
18 foods during last 24 hours, whether children aged 6-23 months had been given meat  
19 during last 24 hours, minimum dietary diversity, whether child had coughed, fever or  
20 diarrhea in the past two weeks, and whether children aged 6-23 months had been  
21 given YYB 5 bags or more. Only those that were significant in the final multivariate  
22 model are presented. We present Odds Ratios (OR) and 95% confidence intervals (CI)  
23 and considered two-tailed P-values of <0.05 for a significant difference.  
24  
25  
26  
27  
28  
29  
30  
31  
32  
33  
34  
35

36  
37 We calculated the feeding practice indicators based on the WHO guideline "Indicators  
38 for Assessing Infant and Young Child Feeding Practices"<sup>23</sup>, which based on the 24 hour  
39 recall method. And all individual hemoglobin values were adjusted using WHO  
40 recommendations based on the altitude of the surveyed villages where children lived.  
41 An adjusted hemoglobin lower than 110g/L<sup>16</sup> was defined as anaemia and was used  
42 to calculate the prevalence of anaemia. A hemoglobin concentration of 90–110 g/L  
43 was defined as mild anaemia, <90 g/L as moderate anaemia or severe anaemia. Cut-  
44 offs for elevated CRP and AGP were >5mg/L and >1mg/L, respectively<sup>24</sup>. If one of  
45 these two indicators were elevated, the children surveyed were classified as infected  
46 children. Serum ferritin concentration <12ug/L and <30ug/L were used to define iron  
47 deficiency in non-infected children and infected children, respectively. The children  
48 with concurrent anaemia and iron deficiency were diagnosed with iron deficiency  
49  
50  
51  
52  
53  
54  
55  
56  
57  
58  
59  
60

1  
2  
3  
4 anaemia<sup>25</sup>. A plasma folic acid concentration of <4ng/ml was used to define folic acid  
5  
6 deficiency according to WHO guidelines<sup>26</sup>. Vitamin B12 deficiency was defined as  
7  
8 <197pg/ml. Cut-offs for elevated sTfR and HCY were 8.3mg/L<sup>27</sup> and 14umol/l,  
9  
10 respectively<sup>28</sup>.

11  
12  
13 Body iron stores (BI) were estimated by applying Cook's formula as follows: body  
14  
15 iron(mg/kg) =-[log(R/F ratio)-2.82290]/0.1207. The R/F ratio was soluble transferrin  
16  
17 receptor(sTfR)/ serum ferritin (SF)<sup>29</sup>. Among them, sTfR needs to be transformed by  
18  
19 the following formula: Flowers sTfR=1.5 \* Roche sTfR +0.35mg/L<sup>30</sup>. The positive value  
20  
21 means iron surplus in stores and the negative value means iron deficit in tissues.

### 22 23 24 25 **Ethical considerations**

26  
27 The study was approved by the Ethics Committee of the Capital Institute of Pediatrics  
28  
29 (reference no.2018017). All interviewees read the Information Sheet and provided  
30  
31 written consent on behalf of the children involved in our study.

### 32 33 34 35 **Participant and public involvement**

36  
37 The participants and the public were not involved in the design, recruitment and  
38  
39 conduct of the study. There are no plans to disseminate the study findings to the study  
40  
41 participants.

## 42 43 44 45 **RESULTS**

46  
47 The flowing chart of this study is shown in **Figure 1**. Among 912 children aged 6-23  
48  
49 months on the name list, a total of 754 children and their caregivers were surveyed,  
50  
51 with 444 being anaemic. There were 183 children aged 12-23 months agreed to draw  
52  
53 venous blood for further laboratory tests, and 52 of them were found acute and/or  
54  
55 chronic infections (CRP > 5 mg/L in blood routine test or AGP > 1 g/L in laboratory  
56  
57 test). Besides, there was no statistical difference between 183 children aged 12-23  
58  
59  
60

months who were taken venous blood and 101 children who refused to draw venous blood (Supplementary Table 1).

Characteristics of 754 surveyed children and their caregivers are shown in **Table 1**. Nearly all main caregivers of the children surveyed were mothers and grandparents, and about 70% of mothers were Han nationality, followed by Tu and Tibetan nationality. More than 60% of mother attended junior high school, and the proportion of mothers who were illiterate was only 4.0%. More than half of grandparents were still illiterate. The main source of household income was working outside the county, followed by agriculture-related work such as growing crops, vegetables and animal husbandry.

**Table1 Characteristics of surveyed children and their caregivers (N=754)**

| Characteristic                 | Percentage or median |
|--------------------------------|----------------------|
| <b>Children</b>                |                      |
| Age, %(n)                      |                      |
| 6-11months                     | 32.8(247)            |
| 12-17months                    | 32.6(246)            |
| 18-23months                    | 34.6(261)            |
| Sex, %(n)                      |                      |
| Boy                            | 52.1(393)            |
| Girl                           | 47.9(361)            |
| <b>Main caregivers, %(n)</b>   |                      |
| Mother                         | 48.7(367)            |
| Grandparent                    | 46.4(350)            |
| Father                         | 4.8(36)              |
| Other                          | 0.1(1)               |
| <b>Mothers</b>                 |                      |
| Age in years (median (Q1, Q3)) | 29(26,31)            |
| Nationality, %(n)              |                      |
| Han                            | 69.9(523)            |

|                               |           |
|-------------------------------|-----------|
| Tu                            | 22.8(171) |
| Tibetan                       | 6.3(47)   |
| Hui                           | 0.3(2)    |
| Others                        | 0.7(5)    |
| <b>Education, %(n)</b>        |           |
| Illiterate                    | 4.0(30)   |
| Primary school                | 13.8(103) |
| Junior high school            | 61.6(461) |
| Senior high school or above   | 17.4(130) |
| Do not know                   | 3.2(24)   |
| <b>Grandparents</b>           |           |
| Age in year (median (Q1, Q3)) | 54(50,59) |
| <b>Education, %(n)</b>        |           |
| Illiterate                    | 60.3(211) |
| Primary school                | 22.6(79)  |
| Junior high school            | 15.1(53)  |
| Senior high school            | 1.1(4)    |
| Do not know                   | 0.9(3)    |
| <b>Household income, %(n)</b> |           |
| Working outside the county    | 89.2(673) |
| Agriculture-related work      | 6.4(48)   |
| Self-employed                 | 2.9(22)   |
| Others                        | 1.2(9)    |
| Do not know                   | 0.3(2)    |

**Table 2** shows the prevalence of anaemia and hemoglobin levels by age and severity in this survey. Most of anaemic children were mildly anaemic, accounting for 76.9% of the total. The prevalence of anaemia in the 18 to 23-month group was significantly lower than that in the 6 to 11-month group ( $p=0.0026$ ) and the 12 to 17-month group ( $p=0.0261$ ). The median hemoglobin levels in the 6 to 11-month group and 12 to 17-month group were lower than that in the 18 to 23-month group (116g/L vs. 121 g/L,  $p<0.0001$  and  $p=0.0004$  respectively).



**Table 2 Prevalence of anaemia and hemoglobin level by age and severity**

|         | Anaemia prevalence ( N=751 ) * |                    |           | Hemoglobin level<br>(median, (Q1, Q3)) |
|---------|--------------------------------|--------------------|-----------|----------------------------------------|
|         | Mild anaemia                   | Moderate or severe | Total     |                                        |
|         | (%, n)                         | anaemia (%, n)     | (%, n)    |                                        |
| 6-11m   | 49.8(123)                      | 15.0(37)           | 64.8(160) | 116(106,125)                           |
| 12-17 m | 51.2(126)                      | 10.2(25)           | 61.4(151) | 116(107,125)                           |
| 18-23 m | 43.4(112)                      | 8.1(21)            | 51.6(133) | 121(111,130)                           |
| Total   | 48.1(361)                      | 11.1(83)           | 59.1(444) | 117(108,127)                           |

\*Three children refused to measure hemoglobin.

**Table 3** shows the results of a univariate logistic analysis of anaemia prevalence in this survey. Older children were less likely to suffer from anaemia than younger children ( $p=0.0028$ ). The prevalence of anaemia in children with Tibetan nationality was significantly higher than those with Han nationality ( $p=0.0016$ ). The prevalence of anaemia in children who consumed iron-rich or iron-fortified foods was significantly lower than that in children who did not consume these foods ( $p=0.0150$ ). The prevalence of anaemia in children who were given meat was also significantly lower than that in children without meat ( $p=0.0077$ ). Furthermore, the anaemia prevalence of children achieving minimum dietary diversity was significantly lower than that of children who did not meet the standard ( $p=0.0163$ ).

**Table 3 Univariate logistic analysis of the prevalence of anaemia**

| Factors     | Sample | Case | Anaemia prevalence | p-value |
|-------------|--------|------|--------------------|---------|
| Child's age |        |      |                    | 0.0028  |
| Nationality |        |      |                    |         |
| Han         | 521    | 291  | 55.9               |         |

|                                                                                           |     |     |      |        |
|-------------------------------------------------------------------------------------------|-----|-----|------|--------|
| Hui                                                                                       | 2   | 0   | 0    | 0.9799 |
| Tu                                                                                        | 170 | 108 | 63.5 | 0.0836 |
| Tibetan                                                                                   | 47  | 38  | 80.9 | 0.0016 |
| Other                                                                                     | 5   | 3   | 60.0 | 0.8570 |
| Children aged 6-23 months given iron-rich or iron-fortified food during the last 24 hours |     |     |      |        |
| Yes                                                                                       | 475 | 265 | 55.8 | 0.0150 |
| No                                                                                        | 276 | 179 | 64.9 |        |
| Children aged 6-23 months given meat during the last 24 hours                             |     |     |      |        |
| Yes                                                                                       | 210 | 108 | 51.4 | 0.0077 |
| No                                                                                        | 541 | 336 | 62.1 |        |
| Minimum dietary diversity during the last 24 hours                                        |     |     |      |        |
| Yes                                                                                       | 364 | 199 | 54.7 | 0.0163 |
| No                                                                                        | 387 | 245 | 63.3 |        |

Note:

<sup>1</sup> Children aged 6-23 months given iron-rich or iron-fortified foods during the last 24 hours: the proportion of children aged 6–23 months had been given iron-rich food or iron fortified food during the last 24 hours that was specially designed for infants and young children, or that was fortified in the home. Iron-rich or iron-fortified foods include flesh foods, commercially fortified foods specially designed for infants and young children which contain iron, or foods fortified in the home with a micronutrient powder containing iron or a liquid-based nutrient supplement containing iron, but not iron tablets.

<sup>2</sup> Children aged 6-23 months given meat during the last 24 hours: the proportion of children aged 6–23 months had been given meat during the last 24 hours that include beef, pork, lamb or other meat and liver, kidney, heart, or other organ meats, and fresh or dried fish, etc.

<sup>3</sup> Minimum dietary diversity during the last 24 hours: the proportion of children aged 6-23 months who received foods from four or more food groups during last 24 hours. The food groups were: a) grains, root and tubers; b) legumes and nuts; c) dairy products (milk, yogurt, cheese); d) meat (meat, fish, poultry and liver/organ meat); e) eggs; f) vitamin-A rich fruits and green vegetables; g) other fruits and vegetables.

The results of multivariate logistic analysis of anaemia prevalence in surveyed children is shown in **Table 4**. Older children (OR=0.968, 95%CI 0.940, 0.998) and those consuming meat (OR=0.698, 95%CI 0.499,0.976) were associated with lower anaemia levels, whereas children of Tibetan nationality (OR=3.123, 95%CI 1.473,6.623) were more likely to be anaemic.

**Table 4 Multivariate logistic analysis of anaemia prevalence**

| Independent variable | Influential factors of anaemia |        |          |                    |
|----------------------|--------------------------------|--------|----------|--------------------|
|                      | $\beta$                        | Wald   | <i>P</i> | OR (95%CI)         |
| Child' age           | -0.0321                        | 4.4930 | 0.0340   | 0.968(0.940,0.998) |
| Nationality          |                                |        |          |                    |
| Hui –Han             | -13.6385                       | 0.0006 | 0.9797   | <0.001             |
| Tu-Han               | 0.3038                         | 2.7371 | 0.0980   | 1.335(0.945,1.942) |
| Tibetan-Han          | 1.1388                         | 8.8166 | 0.0030   | 3.123(1.473,6.623) |
| Other-Han            | 0.0294                         | 0.0010 | 0.9745   | 1.030(0.169,6.260) |
| Introduction of meat | -0.3595                        | 4.4118 | 0.0357   | 0.698(0.499,0.976) |

Results of the laboratory tests for 183 children are shown in **Table 5**. There were 113 children with iron deficiency, accounting for 61.7%. The mean serum ferritin concentration in anaemic children was significantly lower than that in non-anaemic children ( $10.2 \pm 9.6\text{ng/mL}$  vs.  $22.6 \pm 15.9\text{ng/mL}$ ,  $p < 0.0001$ ). The body iron store in anaemic children was significantly lower than that in non-anaemic children ( $-3.1 \pm 4.4\text{mg/kg}$  vs.  $2.1 \pm 3.3\text{mg/kg}$ ,  $p < 0.0001$ ). 32.6% of children with anaemia had elevated sTfR, significantly higher than that in children without anaemia (4.3%,  $p < 0.0001$ ). At the same time, the proportion of folic acid deficiency in anaemic children was also significantly higher than that in non-anaemic children (20.2% vs. 5.3%,  $p = 0.0024$ ). There was no vitamin B12 deficiency either in anaemic or non-anaemic children.

**Table 5 Results of laboratory tests**

|                                                                               | Anaemic children<br>(N=89) | Non-anaemic<br>children<br>(N=94) | Total<br>(N=183) | <i>p</i> |
|-------------------------------------------------------------------------------|----------------------------|-----------------------------------|------------------|----------|
| Serum ferritin(ug/L)                                                          |                            |                                   |                  |          |
| Mean ± SD                                                                     | 10.2 ± 9.6                 | 22.6 ± 15.9                       | 16.6 ± 14.6      | <0.0001  |
| <12ug/L for non-infected children or<br><30ug/L for infected children (% , n) | 80.9% (72)                 | 43.6% (41)                        | 61.7% (113)      | <0.0001  |
| sTfR (>8.3mg/L) (% , n)                                                       | 32.6% (29)                 | 4.3% (4)                          | 18.0% (33)       | <0.0001  |
| Body iron store (mean ± SD)                                                   | -3.1 ± 4.4                 | 2.1 ± 3.3                         | -0.45 ± 4.56     | <0.0001  |
| Folic acid (<4ng/mL) (% , n)                                                  | 20.2% (18)                 | 5.3% (5)                          | 12.6% (23)       | 0.0024   |
| Vitamin B12 (<197pg/mL) (% , n)                                               | 0.0% (0)                   | 0.0% (0)                          | 0.0% (0)         | -        |
| Homocysteine (>14umol/L) (% , n)                                              | 4.5% (4)                   | 1.1% (1)                          | 2.7% (5)         | 0.1425   |

**Figure 2** shows biological causes of anaemia. 80.9% of children with anaemia were due to iron deficiency, and 20.2% of them had both iron and folic acid deficiencies. The biological causes of 19.1% anaemic children were unknown.

## DISCUSSION

### Main findings

The anaemia prevalence of children aged 6-23 months in Huzhu County was 59.1% and most of them were mildly anaemic. The prevalence of anaemia in the 18 to 23month group was significantly lower than that in the 6 to 11month group ( $p=0.0026$ ) and the 12 to 17month group ( $p=0.0261$ ). Meanwhile, children of younger age, Tibetan nationality and not introducing meat were more likely to be anaemic. 80.9% of children with anaemia were due to iron deficiency, and 20.2% suffered from both iron deficiency and folic acid deficiency. The prevalence of iron deficiency among all children was 61.7% and 43.6% of non-anaemic children also had iron deficiency. Body

1  
2  
3  
4 iron stores in all children tested averaged  $-0.45 \pm 4.56$  mg/kg. The proportion of  
5  
6 microcytic hypochromic anaemia (MCH, MCV and MCHC were lower than normal  
7  
8 value) was 13.1%. And the specificity of the combination of MCV + MCH + MCHC in  
9  
10 the diagnosis of iron deficiency anaemia was 100%, but its sensitivity was only 17.8%.

### 11 12 13 **Influencing factors of anaemia**

14  
15 Children aged 6-11 months are in the transition period from exclusive breastfeeding  
16  
17 to complementary feeding, during which the storage iron from birth is depleted and  
18  
19 complementary foods become the main source of iron, and they were more likely to  
20  
21 suffer from anaemia. In our study, anaemia prevalence of children at this age is the  
22  
23 highest (64.8%).

24  
25  
26  
27 Our analysis showed that eating meat was a protective factor of child anaemia,  
28  
29 however, few caregivers gave meat to their children of this age due to the wrong  
30  
31 beliefs that they could not digest meat. In addition, some caregivers did not know how  
32  
33 to prepare meat for young infants, especially at the very beginning of complementary  
34  
35 feeding<sup>31</sup>, thus infant feeding counseling should include these specific issues to  
36  
37 provide caregivers accurate knowledge and help them solve problems, such as  
38  
39 demonstration of the preparation of meat instead of just giving information.

40  
41  
42  
43 Compared with other nationalities, children of Tibetan nationality, who accounted for  
44  
45 about 10% in Huzhu County, were more likely to be anaemic<sup>14</sup>, probably because their  
46  
47 special customs and dietary habits with the main complementary food for children  
48  
49 being zanba (a local ethnic food consisting mainly of carbohydrates) and porridge,  
50  
51 which contain very few irons<sup>32,33</sup>. At the same time, poor family economic conditions  
52  
53 would also make it unaffordable to feed animal food to their children<sup>34</sup>.

### 54 55 56 **The biological causes of anaemia**

57  
58 The biological causes of anaemia can generally be summarized into three categories:  
59  
60

1  
2  
3  
4 nutritional anaemia, infectious diseases and genetic hemoglobin disorders. Nutritional  
5  
6 anaemia results from insufficient bioavailability of hemopoietic nutrients (iron,  
7  
8 vitamin B12, vitamin A and folic acid) needed to meet the demands of hemoglobin  
9  
10 and erythrocyte synthesis and decreased absorption enhancers such as vitamin C.  
11  
12 Infectious diseases include soil-transmitted helminths, malaria and schistosomiasis.  
13  
14 Genetic hemoglobin disorders include thalassemia and hemoglobin variants etc<sup>17</sup>.  
15  
16 Many previous studies have found that iron deficiency may be the most common  
17  
18 cause of anaemia <sup>1, 6, 17, 35</sup>. Our study confirmed that 80.9% of anaemic children aged  
19  
20 12-23 months in Huzhu County were due to iron deficiency. The prevalence of iron  
21  
22 deficiency among all children was 61.7% and body iron stores in all children tested  
23  
24 averaged only  $-0.45 \pm 4.56$  mg/kg.

25  
26  
27 Iron deficiency (ID) is a state in which iron is insufficient to maintain normal  
28  
29 physiological functions of tissues such as blood, brain, and muscle. If iron deficiency  
30  
31 lasts too long or is serious enough, it can result in iron deficiency anaemia (IDA)<sup>6</sup>. In  
32  
33 addition to the important role of oxygen carrier in the heme group of hemoglobin,  
34  
35 iron also exists in many key proteins in cells, such as cytochromes, myoglobin, neural  
36  
37 transmitters, various enzymes and coenzymes<sup>36</sup>. Therefore, iron deficiency not only  
38  
39 causes anaemia, but also has many other adverse effects, especially on children in  
40  
41 growth and development.

42  
43  
44 Iron deficiency is often found in association with a deficiency of folic acid. Combined  
45  
46 folic and iron deficiency may occur in preterm infants who are fed unfortified formula  
47  
48 based on evaporated milk. Other study indicated that infants fed on goat's milk were  
49  
50 also at risk<sup>37</sup>. Our study found that 20.2% of children suffered from both iron  
51  
52 deficiency and folic acid deficiency. Hence, attentions also need to be paid to the  
53  
54 deficiency of folic acid. There was no vitamin B12 deficiency either in anaemic or non-  
55  
56 anaemic children tested. However, biological causes of the remaining 19.1% of  
57  
58 anaemic children were still unknowns and may need further explorations.  
59  
60

## Recommendations on reducing nutritional anaemia

Deficiencies of iron and folic acid were the main biological causes of children's anaemia in Huzhu County, therefore, feeding counseling and nutrients supplements, as biological interventions, are appropriate and should be further strengthened.

(1) Improving traditional delivery channels for infant and young child feeding (IYCF) nutrients supplements (YYB program).

IYCF is one of the key strategies to lower the risk of iron-deficiency anaemia in early infancy<sup>17, 38</sup>. Previous studies found that inappropriate IYCF practices were common in many rural areas in China<sup>39,40</sup>, for instance, complementary foods generally contained mainly carbohydrates and lacked protein and fat<sup>41</sup>, or were introduced to children too early or too late, or were given in too small amounts or not frequently enough<sup>42,43</sup>.

Nutrients supplements have been commonly accepted as effective interventions in reducing child anaemia worldwide<sup>15, 44-49</sup>. In China, a domestically produced multi-nutrient powders (MNPs) for infants and young children called Ying Yang Bao (YYB) was developed, and a study conducted in Gansu Province from 2001 to 2004 to test the effectiveness of this complementary food supplement, showed that the use of YYB could significantly reduce the anaemia prevalence<sup>46</sup>.

The information-motivation-behavior skills (IMB) model indicates that information can be transformed into action that can motivate individuals and eventually influence their attitudes and behaviors<sup>50,51</sup>. In China, information and knowledge about infant feeding was mainly disseminated through the traditional rural three-tier healthcare system (county-township-village). Village doctors were responsible to provide face-to-face infant and young child feeding counseling to caregivers<sup>14, 52</sup>. We conducted a controlled interventional study in Huzhu and Guinan County from 2012 to 2014, training village doctors to provide IYCF counseling and disseminating YYB to caregivers,

1  
2  
3  
4 and the results showed that the anaemia prevalence decreased more in the  
5 intervention county (receiving IYCF counseling and YYB) than in the control county(not  
6 receiving IYCF counseling and YYB, 71.1% to 47.8% vs. 86.3% to 75.3%, respectively)<sup>15</sup>.  
7  
8 We also found an improvement of caregivers' feeding practice<sup>15</sup>. Therefore, we should  
9  
10 continue making use of the traditional health information dissemination system and  
11  
12 measures need to be taken to further improve the quality of services, for example,  
13  
14 conducting regular refresh training and supervision, providing monetary incentives to  
15  
16 village doctors, and more importantly, tailoring IYCF information to the local feeding  
17  
18 problems and special dietary habits instead of barely giving general knowledge.  
19  
20  
21  
22

## 23 (2) Exploring new channels for delivering IYCF information and disseminating YYB.

24  
25 Although traditional delivery channels (mainly by village doctors) proved to be  
26  
27 effective in our previous study, the key IYCF indicators were still low and the YYB  
28  
29 compliance needed to be further improved<sup>53</sup> to increase the effectiveness of the  
30  
31 interventional program. In addition, the sustainability of the YYB programs could also  
32  
33 be an issue since the anaemia prevalence in Huzhu County went up from 47.8% in  
34  
35 2014 to 59.1% in 2018. Therefore, we need to explore new channels for delivery these  
36  
37 interventions.  
38  
39  
40

41  
42 Nowadays, mobile phones and the Internet have spread to millions of households in  
43  
44 China. Data showed that, by the end of 2017, there were 1417.49 million mobile  
45  
46 phone users and 772 million Internet users, of which 753 million were smartphone  
47  
48 Internet users. The Internet penetration rate reached 55.8%, of which 35.4% was in  
49  
50 rural areas<sup>19</sup>. Social media and smartphones have become new channels for  
51  
52 information acquisition, and these have been widely used in many health education  
53  
54 researches<sup>54-56</sup>. A systematic review proved the feasibility of delivering eHealth  
55  
56 interventions to improve health literacy skills among people with different health  
57  
58 conditions, risk factors and socio-economic backgrounds<sup>57</sup>. However, using eHealth or  
59  
60 mHealth methods to deliver complementary feeding information in China is rarely



1  
2  
3  
4 reported. Therefore, further studies are needed to assess the feasibility and  
5 effectiveness of such delivery channels in improving IYCF knowledge and practice as  
6 well as YYB compliance in rural China.  
7  
8  
9

## 10 11 **CONCLUSIONS**

12  
13  
14 The anaemia prevalence of children aged 6-23 months in Huzhu County was 59.1%  
15 and children of younger age, Tibetan nationality and not introducing meat were more  
16 likely to be anaemic. 80.9% of children with anaemia were due to iron deficiency, and  
17 20.2% of them suffered from both iron and folic acid deficiencies. Therefore, previous  
18 interventions of feeding counseling and nutrients supplements are appropriate and  
19 should be further strengthened.  
20  
21  
22  
23  
24  
25  
26  
27

### 28 **Strengths and limitations of this study**

29  
30 The first strength of our study was that we proved that iron deficiency was the leading  
31 biological cause of anaemia for young children aged 12-23 months in Huzhu County,  
32 and therefore confirm the appropriateness of the on-going interventional(YYB  
33 supplementation). Secondly, we found specific age and ethnic groups of children who  
34 were more vulnerable to be anaemic, and it implies that the future program  
35 implementation should pay more attentions to these groups.  
36  
37  
38  
39  
40

41  
42 Our study has several limitations. Firstly, the study took place only within one rural  
43 Chinese county and caution is needed when generalizing the findings from this study  
44 to other settings. Secondly, although we surveyed all the eligible children aged 6-23  
45 months and their caregivers in each sampled village, the sample size was still small.  
46  
47  
48  
49  
50  
51

### 52 **Acknowledgments**

53  
54 The authors wish to thank all colleagues from the Huzhu Maternal and Child Health  
55 and Family Planning Service Center for coordination, logistic arrangements and blood  
56 routine tests, and we want to thank all students from Qinghai Institute of Health  
57  
58  
59  
60

1  
2  
3  
4 Sciences for their hard work as interviewers. We are indebted to all the mothers and  
5 caregivers who participated in our survey.  
6  
7  
8  
9

### 10 **Authorship statement**

11  
12 The study was initiated, conceptualized, and supervised by JSH, SYC and YFZ. LJW,  
13 YWH, QW and WW collected and analyzed data. LJW conducted laboratory tests. YFZ,  
14 YWH, and QW participated in the explanation and discussion of the results. The  
15 manuscript was drafted by YWH, reviewed and revised by YFZ, QW, SYC and JSH. All  
16 authors read and approved the final manuscript.  
17  
18  
19  
20  
21  
22  
23  
24

### 25 **Funding**

26  
27 The survey was funded by the United Nations Children's Fund (UNICEF). The founder  
28 was involved in study design, data interpretation, preparation of the manuscript, and  
29 decision to publish.  
30  
31  
32  
33  
34

### 35 **Competing interests**

36  
37 None declared.  
38  
39  
40  
41

### 42 **Data showing statement**

43  
44 Additional data can be accessed via the Dryad data repository at  
45 <https://datadryad.org/> with the doi: 10.5061/dryad.57v2100  
46  
47  
48  
49  
50

## 51 **REFERENCES**

- 52  
53  
54 1. Stevens GA, Finucane MM, De-Regil LM, Paciorek CJ, Flaxman SR, Branca F, Peña-Rosas JP, Bhutta  
55 ZqA, Ezzati M: Global, regional, and national trends in haemoglobin concentration and prevalence  
56 of total and severe anaemia in children and pregnant and non-pregnant women for 1995–2011:a  
57 systematic analysis of population-representative data. *Lancet Glob Health* 2013, 1:e16-25.  
58  
59 2. Ministry of Health China. People Republic of China. National report on national status of children  
60

- aged 0-6 year. Beijing: Ministry of China; 2012.
3. Fang HY, Yu DM, Guo QY, Ju LH, Xu XL, Yu WT, Jia FM, Zhao LY: Anaemia prevalence of among 0 – 5 years old children in China, 2013. *Chin J Public Health*. vol. 34; 2018: 1654-1657.
  4. Liu S, Li J, Gong CR, Wei CM, Li XZ, Song Y: Prevalence of anaemia among infants and young children in rural areas of Hubei province. *Chin J Public Health* 2013, 30(7):899-902.
  5. Yu CY, Ban WF, Xie L, Wei P, Lan S, Q, Shen L, Yang YJ, Wang CB: Prevalence and influence factors of iron deficiency anaemia among 6-23 months old children in Qiannan area of Guizhou province. *Chin J Public Health* 2018, 34(6):812-816.
  6. World Health Organization. Iron Deficiency Anaemia Assessment, Prevention and Control. *A Guide for Program Managers*. vol. WHO/NHD/01.3. Geneva, Switerland: World Health Organization; 2001.
  7. Horton S, Ross J: The economics of iron deficiency. *Food Policy* 2003, 28:51-75.
  8. Tseng PT, Cheng YS, Yen CF, Chen YW, Stubbs B, Whiteley P, Carvalho AF, Li DJ, Chen TY, Yang WC *et al*: Peripheral iron levels in children with attention-deficit hyperactivity disorder: a systematic review and meta-analysis. *Sci Rep* 2018, 8(1):788.
  9. Hergüner S, Keleşoğlu FM, Tanıdır C, Cöpür M: Ferritin and iron levels in children with autistic disorder: Hergüner S, Keleşoğlu FM, Tanıdır C, et al. Ferritin and iron levels in children with autistic disorder. *Eur J Pediatr*. 2012;171(1)143-6.
  10. Pivina L, Semenova Y, Dosa MD, Dauletyarova M, Bjorklund G: Iron Deficiency, Cognitive Functions, and Neurobehavioral Disorders in Children. *J Mol Neurosci* 2019.
  11. Sarah K W, Randi S: Pediatric Screening. *Primary Care: Clinics in Office Practice* 2019, 46(1):69-84.
  12. Colin D. M, Claudia S, Doris MF, Chalapati R, Mie I, Niels T, Christina B, Alan DL, Christopher J.L. M: Global Burden of Disease 2000: Version 2 methods and results. In: *Global Programme on Evidence for Health Policy Discussion Paper* Geneva, Switzerland: World Health Organization; 2002: No 50.
  13. World Health Organization: The Global Burden of Disease - 2004 Update. Geneva: Switzerland: World Health Organization; 2008.
  14. Zhang YF, Wu Q, Wang W, Han HJ, Chen L, Chang SY: Investigation and analysis of infant feeding and nutrition status of 6-23 months Children in rural areas of Qinghai Province. *Maternal and Child Health Care of China* 2016, 31(13):2712-2717.
  15. Zhang YF, Wu Q, Wang W, van Velthoven MH, Chang SY, Han HJ, Xing M, Chen L, Scherpbier RW: Effectiveness of complementary food supplements and dietary counselling on anaemia and stunting in children aged 6-23 months in poor areas of Qinghai Province, China: a controlled interventional study. *BMJ Open* 2016, 6(10):e011234.
  16. World Health Organization: Haemoglobin concentrations for the diagnosis of anaemia and assessment of severity. Geneva: World Health Organization; 2011.
  17. Balarajan Y, Ramakrishnan U, Özalpin E, Shankar AH, Subramanian SV: Anaemia in low-income and middle-income countries. *Lancet* 2011(378):2123-2135.
  18. Qinghai Bureau of Statistics. Qinghai Statistics Year Book 2017. Beijing: China Statistics Press; 2018.
  19. National bureau of Statistics. Statistical Communiqué of the People's Republic of China on 2017 National Economic and Social Development. Beijing: National bureau of Statistics; 2018.
  20. People's Government of Huzhu County. Introduction of Huzhu County. Huzhu County, Qinghai Province. [website in chinese]. Available: <http://www.huzhu.gov.cn/contents/197/9551.html>. Accessed: 5 February 2019.
  21. People's government of Huzhu County. 2017 government report of Huzhu County. Huzhu

- County, Qinghai Province. [website in chinese]. Available: <http://www.huzhu.gov.cn/contents/211/10406.html>. Accessed: 5 February 2019.
22. Zhang S, Wu Q, van Velthoven MH, Chen L, Car J, Rudan I, Zhang Y, Li Y, Scherpbier RW: Smartphone versus pen-and-paper data collection of infant feeding practices in rural China. In: *J Med Internet Res*. vol. 14; 2012: e119.
  23. World Health Organization: Indicators for assessing infant and young child feeding practices part 2: measurement. Geneva: World Health Organization; 2010. Available from: [http://whqlibdoc.who.int/publications/2010/9789241599290\\_eng.pdf?ua=1](http://whqlibdoc.who.int/publications/2010/9789241599290_eng.pdf?ua=1).
  24. Thurnham DI, McCabe GP, Northrop-Clewes CA, Nestel P: Effects of subclinical infection on plasma retinol concentrations and assessment of prevalence of vitamin A deficiency: meta-analysis. *Thurnham DI, McCabe GP, Northrop Clewes CA, et al Effects of subclinical infection on plasma retinol concentrations and assessment of prevalence of vitamin A deficiency: meta analysis Lancet* 2003, 362(9401):2052-2058.
  25. World Health Organization: Serum ferritin concentrations for the assessment of iron status and iron deficiency in populations. *Vitamin and Mineral Nutrition Information System (WHO/NMH/NHD/MNM/11.2)*. Geneva: World Health Organization; 2011.
  26. World Health Organization: Serum and red blood cell folic acid concentrations for assessing folic acid status in populations. *Vitamin and Mineral Nutrition Information System*. Geneva: World Health Organization; 2015.
  27. Grant FK, Martorell R, Flores-Ayala R, Cole CR, Ruth LJ, Ramakrishnan U, Suchdev PS: Comparison of indicators of iron deficiency in Kenyan children. *Am J Clin Nutr*, 95(5):1231-1237.
  28. Engle-Stone R, Williams TN, Nankap M, Ndjebayi A, Gimou MM, Oyono Y, Tarini A, Brown KH, Green R: Prevalence of Inherited Hemoglobin Disorders and Relationships with Anaemia and Micronutrient Status among Children in Yaounde and Douala, Cameroon. *Nutrients* 2017, 9(7).
  29. Cook JD, Flowers CH, Skikne BS: The quantitative assessment of body iron. *blood* 2003, 101(9):3359-3364.
  30. Pfeiffer CM, Cook JD, Mei Z, Cogswell ME, Looker AC, Lacher DA: Evaluation of an automated soluble transferrin receptor (sTfR) assay on the Roche Hitachi analyzer and its comparison to two ELISA assays. *Clin Chim Acta* 2007, 382(1-2):112-116.
  31. Wu Q, van Velthoven MH, Chen L, Car J, Rudan D, Saftić V, Zhang YF, Li Y, Scherpbier RW: Improving the intake of nutritious food in children aged 6-23 months in Wuyi County, China – a multi-method approach. *Croatian Medical Journal* 2013, 54(2):157-170.
  32. Dang S, Yan H, Yamamoto S, Wang X, Zeng L: Feeding practice among younger Tibetan children living at high altitudes. *Eur J Clin Nutr* 2005, 59(9):1022-1029.
  33. Xing Y, Yan H, Dang S: Survey on feeding knowledge and behavior of Tibetan infant mothers in rural Lhasa *Chinese Public Health* 2010, 26(8):945-946.
  34. Zhang Y, Feng G, Zhang Y: Survey on feeding and growth of Hui and Tibetan children under 5 years old in Gansu Province *Medicine and Society* 2009, 22(11):37-39.
  35. McLean E, Cogswell M, Egli I, Wojdyla D, de Benoist B: Worldwide prevalence of anaemia, WHO Vitamin and Mineral Nutrition Information System, 1993-2005. *Public Health Nutr* 2009, 12(4):444-454.
  36. DeLoughery TG: Microcytic anaemia. *N Engl J Med* 2014, 371(14):1324-1331.
  37. DeMaeyer EM, Dallman P, Gurney JM, L.Hallberg, Sood SK, Srikantia SG: Preventing and Controlling Iron Deficiency Anaemia through Primary Health Care--A guide for health

- administrators and programme managers. In. Geneva, Switzerland: World Health Organization 1989.
38. McDonald SJ, Middleton P, Dowswell T, Morris PS: Effect of timing of umbilical cord clamping of term infants on maternal and neonatal outcomes (Review). *The Cochrane Collaboration* 2014, 9(2):303-397.
  39. Chang SY, Chen CM, He W, Wang YY: Analysis on the changes of nutritional status in China - the improvement of complementary feeding among Chinese infants and young children. *Wei Sheng Yan Jiu* 2007(36):19-20.
  40. Wang XL, Hojer B, Guo SF, Luo SS, Zhou WY, Wang Y: Stunting and 'overweight' in the WHO Child Growth Standards – malnutrition among children in a poor area of China. *Public Health Nutrition* 2009, 12(11):1991-1998.
  41. Chang CM: Fat intake and nutritional status of children in China. *The American Journal of Clinical Nutrition* 2000, 72(5):1368s-1372s.
  42. Chen CM, He W, Chang SY: The changes of the attributable factors of child growth. *Wei Sheng Yan Jiu* 2006(35):765-768.
  43. Wang XL, Chu KY, Wang Y: Analysis of current situation of breastfeeding and complementary feeding of children aged under 2 years in 105 maternal and child health cooperative project counties. *Chin J Child Health Care* 2000(18):144-146.
  44. Huo JS, Sun J, Fang Z, Chang SY, Zhao L, Fu P, Wang J, Huang J, Wang L, Begin F *et al*: Effect of home-based complementary food fortification on prevalence of anaemia among infants and young children aged 6 to 23 months in poor rural regions of China. *Food and Nutrition Bulletin* 2015, 36(4):405-414.
  45. Wang J, Chang SY, Zhao L, Yu W, Zhang J, Man Q, He L, Duan Y, Wang H, Scherpbier R *et al*: Effectiveness of community-based complementary food supplement (Yingyangbao) distribution in children aged 6-23 months in poor areas in China. *PLoS One* 2017, 12(3):e0174302.
  46. Wang Y, Chen C, Wang F, Jia M, Wang K: Effects of nutrient fortified complementary food supplements on anaemia of infants and young children in poor rural of Gansu. *Biomedical and Environmental Sciences* 2009, 22(3):194-200.
  47. Zulfiqar AB, Jai KD, Arjumand R, Michelle FG, Neff W, Susan H, Patrick W, Anna L, Robert EB: Evidence-based interventions for improvement of maternal and child nutrition: what can be done and at what cost? *Lancet* 2013, 382(9890):452-477.
  48. De-Regil LM, Suchdev PS, Vist GE, Walleser S, Pena-Rosas JP: Home fortification of foods with multiple micronutrient powders for health and nutrition in children under two years of age (Review). *Evid Based Child Health* 2013, 8(1):112-201.
  49. Suchdev PS, Ruth LJ, Woodruff BA, Mbakaya C, Mandava U, Flores-Ayala R, Jefferds MED: Selling Sprinkles micronutrient powder reduces anaemia, iron deficiency, and vitamin A deficiency in young children in Western Kenya: a cluster-randomized controlled trial. *The American Journal of Clinical Nutrition* 2012, 95(5):1223-1230.
  50. Jeffrey DF, William AF: Changing AIDS-risk behavior. *Psychological Bulletin* 1992, 111(3):455-474.
  51. Jacobs RJ, Caballero J, Ownby RL, Kane MN: Development of a culturally appropriate computer-delivered tailored internet-based health literacy intervention for spanish-dominant hispanics living with HIV. *BMC Medical Informatics and Decision Making* 2014, 14(1):103.
  52. Wu Q, Zhang YF, Chang SY, Wang W, van Velthoven MH, Han HJ, Xing M, Chen L, Du X, Scherpbier RW: Monitoring and evaluating the adherence to a complementary food supplement (Ying Yang

- 1  
2  
3 Bao) among young children in rural Qinghai, China: a mixed methods evaluation study. *J Glob Health* 2017, 7(1):011101.
- 4  
5  
6 53. Wang J, Chang SY, Zhao L, Yu W, Zhang J, Man Q, He L, Duan Y, Wang H, Scherpbier R *et al*:  
7 Effectiveness of community-based complementary food supplement (Yingyangbao) distribution in  
8 children aged 6-23 months in poor areas in China. *PLoS One* 2017, 12(3).
- 9  
10 54. Pander T, Pinilla S, Dimitriadis K, Fischer MR: The use of Facebook in medical education--a literature  
11 review. *GMS Z Med Ausbild.* vol. 31; 2014: Doc33.
- 12  
13 55. He C, Wu S, Zhao Y, Li Z, Zhang Y, Le J, Wang L, Wan S, Li C, Li Y *et al*: Social Media-Promoted Weight  
14 Loss Among an Occupational Population: Cohort Study Using a WeChat Mobile Phone App-Based  
15 Campaign: He C, Wu S, Zhao Y, et al. Social Media-Promoted Weight Loss Among an Occupational  
16 Population: Cohort Study Using a WeChat Mobile Phone App-Based Campaign. *J Med Internet Res.*  
17 2017;19(10)e357.
- 18  
19 56. Li W, Han LQ, Guo YJ, Sun J: Using WeChat official accounts to improve malaria health literacy  
20 among Chinese expatriates in Niger: an intervention study: Li W, Han LQ, Guo YJ, et al. *Malar J.*  
21 2016;15(1)567.
- 22  
23 57. Jacobs RJ, Lou JQ, Ownby RL, Caballero J: A systematic review of eHealth interventions to improve  
24 health literacy: Jacobs RJ, Lou JQ, Ownby RL, et al. A systematic review of eHealth interventions to  
25 improve health literacy. *Health Informatics J.* 2016;22(2)81-98.
- 26  
27  
28  
29

## Figure legends

30  
31  
32 **Figure 1 Flowchart of study procedures**

33  
34 **Figure 2 Biological causes of anaemia**

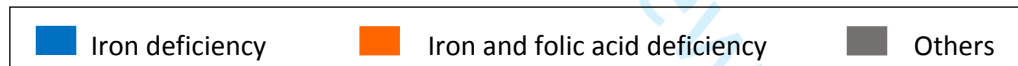

1  
2  
3  
4  
5  
6  
7  
8  
9  
10  
11  
12  
13  
14  
15  
16  
17  
18  
19  
20  
21  
22  
23  
24  
25  
26  
27  
28  
29  
30  
31  
32  
33  
34  
35  
36  
37  
38  
39  
40  
41  
42  
43  
44  
45  
46  
47  
48  
49  
50  
51  
52  
53  
54  
55  
56  
57  
58  
59  
60

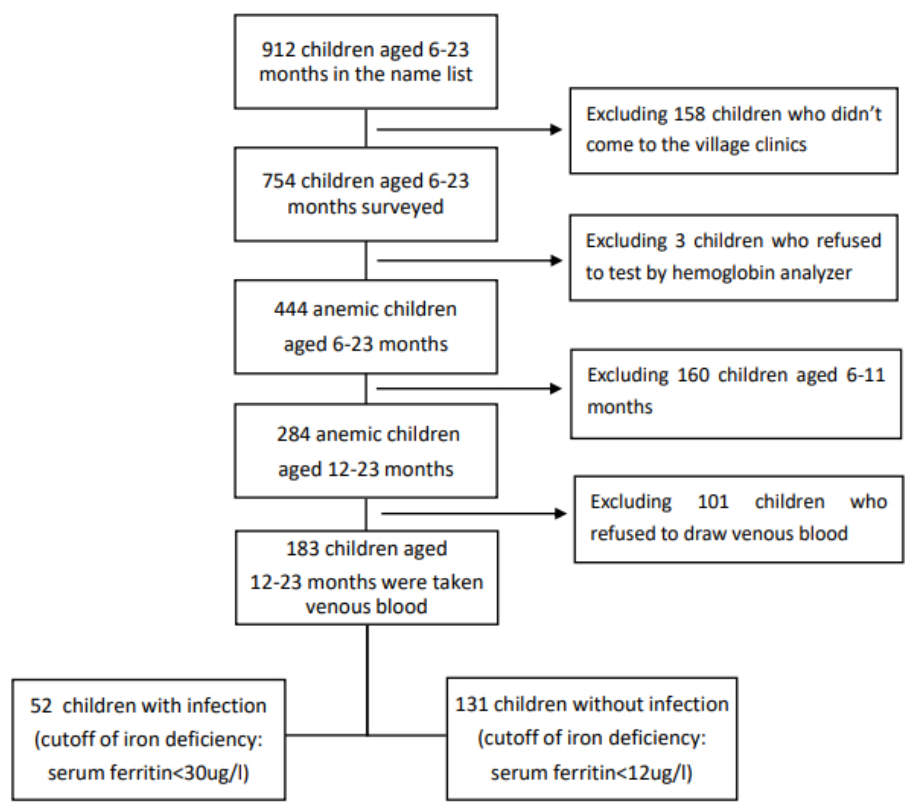

Figure 1 Flowchart of study procedures

Flowchart of study procedures

1  
2  
3  
4  
5  
6  
7  
8  
9  
10  
11  
12  
13  
14  
15  
16  
17  
18  
19  
20  
21  
22  
23  
24  
25  
26  
27  
28  
29  
30  
31  
32  
33  
34  
35  
36  
37  
38  
39  
40  
41  
42  
43  
44  
45  
46  
47  
48  
49  
50  
51  
52  
53  
54  
55  
56  
57  
58  
59  
60

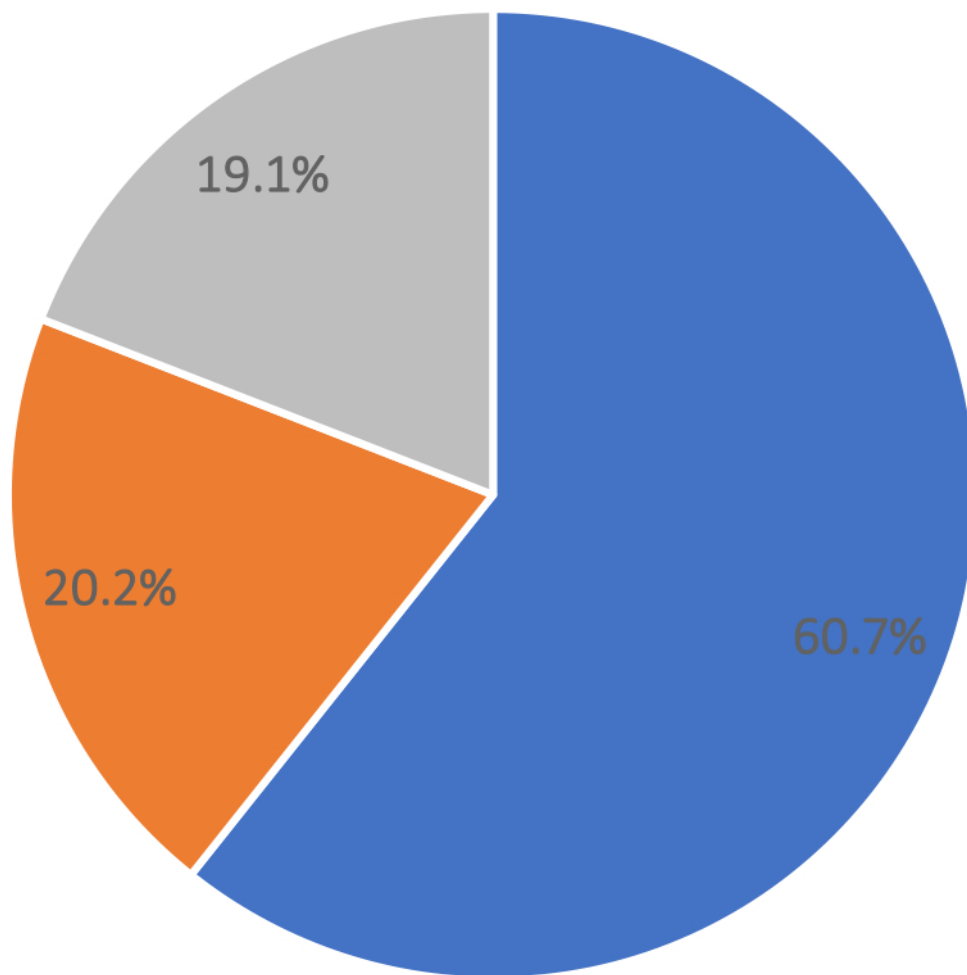

causes of anaemia



Supplementary Table 1 Background characteristics of children with and without venous blood drawn

| Characteristic                 | Children with venous<br>blood drawn(N=183) | Children without venous<br>blood drawn (N=101) | <i>p</i> -value |
|--------------------------------|--------------------------------------------|------------------------------------------------|-----------------|
| <b>Children</b>                |                                            |                                                |                 |
| Age, %(n)                      |                                            |                                                | 0.3486          |
| 12-17months                    | 56.3(103)                                  | 50.5(51)                                       |                 |
| 18-23months                    | 43.7(80)                                   | 49.5(50)                                       |                 |
| Sex, %(n)                      |                                            |                                                | 0.9184          |
| Boy                            | 54.1(99)                                   | 45.9(84)                                       |                 |
| Girl                           | 53.5(54)                                   | 46.5(47)                                       |                 |
| <b>Main caregivers, %(n)</b>   |                                            |                                                | 0.3213          |
| Mother                         | 40.4(74)                                   | 49.5(50)                                       |                 |
| Grandparent                    | 53.6(98)                                   | 47.5(48)                                       |                 |
| Father                         | 5.5(10)                                    | 3.0(3)                                         |                 |
| Other                          | 0.6(1)                                     | -                                              |                 |
| <b>Mothers</b>                 |                                            |                                                |                 |
| Age in years (median (Q1, Q3)) | 29(26,32)                                  | 31(28,34)                                      | 0.0511          |
| Nationality, %(n)              |                                            |                                                | 0.6858          |
| Han                            | 68.9(51)                                   | 62.0(31)                                       |                 |
| Tu                             | 24.3(18)                                   | 28.0(14)                                       |                 |
| Tibetan                        | 6.8(5)                                     | 10.0(5)                                        |                 |
| Education, %(n)                |                                            |                                                | 0.2235          |
| Illiterate                     | 8.1(6)                                     | 2.0(1)                                         |                 |
| Primary school                 | 17.6(13)                                   | 26.0(13)                                       |                 |
| Junior high school             | 58.1(43)                                   | 64.0(32)                                       |                 |
| Senior high school or above    | 14.9(11)                                   | 8.0(4)                                         |                 |
| Do not know                    | 1.4(1)                                     | -                                              |                 |
| <b>Grandparents</b>            |                                            |                                                |                 |
| Age in year (median (Q1, Q3))  | 54(50,60)                                  | 54(51,57.5)                                    | 0.6643          |
| Education, %(n)                |                                            |                                                | 0.4168          |
| Illiterate                     | 62.2(61)                                   | 50.0(24)                                       |                 |
| Primary school                 | 20.4(20)                                   | 27.1(13)                                       |                 |
| Junior high school             | 15.3(15)                                   | 18.8(9)                                        |                 |

|                               |           |          |               |
|-------------------------------|-----------|----------|---------------|
| Senior high school            | 2.0(2)    | 2.1(1)   |               |
| Do not know                   | -         | 2.1(1)   |               |
| <b>Household income, %(n)</b> |           |          | <b>0.1215</b> |
| Working outside the county    | 91.3(167) | 91.1(92) |               |
| Agriculture-related work      | 7.1(13)   | 3.9(4)   |               |
| Self-employed                 | 1.6(3)    | 3.0(3)   |               |
| Others                        | -         | 2.0(2)   |               |

For peer review only

**STROBE 2007 (v4) Statement—Checklist of items that should be included in reports of *cross-sectional studies***

| Section/Topic                | Item # | Recommendation                                                                                                                                                                       | Reported on page # |
|------------------------------|--------|--------------------------------------------------------------------------------------------------------------------------------------------------------------------------------------|--------------------|
| <b>Title and abstract</b>    | 1      | (a) Indicate the study’s design with a commonly used term in the title or the abstract                                                                                               | 1                  |
|                              |        | (b) Provide in the abstract an informative and balanced summary of what was done and what was found                                                                                  | 3-4                |
| <b>Introduction</b>          |        |                                                                                                                                                                                      |                    |
| Background/rationale         | 2      | Explain the scientific background and rationale for the investigation being reported                                                                                                 | 4-6                |
| Objectives                   | 3      | State specific objectives, including any prespecified hypotheses                                                                                                                     | 6                  |
| <b>Methods</b>               |        |                                                                                                                                                                                      |                    |
| Study design                 | 4      | Present key elements of study design early in the paper                                                                                                                              | 6-7                |
| Setting                      | 5      | Describe the setting, locations, and relevant dates, including periods of recruitment, exposure, follow-up, and data collection                                                      | 7                  |
| Participants                 | 6      | (a) Give the eligibility criteria, and the sources and methods of selection of participants                                                                                          | 7                  |
| Variables                    | 7      | Clearly define all outcomes, exposures, predictors, potential confounders, and effect modifiers. Give diagnostic criteria, if applicable                                             | 11-12              |
| Data sources/<br>measurement | 8*     | For each variable of interest, give sources of data and details of methods of assessment (measurement). Describe comparability of assessment methods if there is more than one group | 9-10               |
| Bias                         | 9      | Describe any efforts to address potential sources of bias                                                                                                                            | 8-10               |
| Study size                   | 10     | Explain how the study size was arrived at                                                                                                                                            | 8                  |
| Quantitative variables       | 11     | Explain how quantitative variables were handled in the analyses. If applicable, describe which groupings were chosen and why                                                         | N/A                |
| Statistical methods          | 12     | (a) Describe all statistical methods, including those used to control for confounding                                                                                                | 10-11              |
|                              |        | (b) Describe any methods used to examine subgroups and interactions                                                                                                                  | N/A                |
|                              |        | (c) Explain how missing data were addressed                                                                                                                                          | 10-11              |
|                              |        | (d) If applicable, describe analytical methods taking account of sampling strategy                                                                                                   | 10-11              |
|                              |        | (e) Describe any sensitivity analyses                                                                                                                                                | N/A                |
| <b>Results</b>               |        |                                                                                                                                                                                      |                    |

1  
2  
3  
4  
5  
6  
7  
8  
9  
10  
11  
12  
13  
14  
15  
16  
17  
18  
19  
20  
21  
22  
23  
24  
25  
26  
27  
28  
29  
30  
31  
32  
33  
34  
35  
36  
37  
38  
39  
40  
41  
42  
43  
44  
45  
46

|                          |     |                                                                                                                                                                                                              |       |
|--------------------------|-----|--------------------------------------------------------------------------------------------------------------------------------------------------------------------------------------------------------------|-------|
| Participants             | 13* | (a) Report numbers of individuals at each stage of study—eg numbers potentially eligible, examined for eligibility, confirmed eligible, included in the study, completing follow-up, and analysed            | 12;27 |
|                          |     | (b) Give reasons for non-participation at each stage                                                                                                                                                         | N/A   |
|                          |     | (c) Consider use of a flow diagram                                                                                                                                                                           | 29    |
| Descriptive data         | 14* | (a) Give characteristics of study participants (eg demographic, clinical, social) and information on exposures and potential confounders                                                                     | 12-13 |
|                          |     | (b) Indicate number of participants with missing data for each variable of interest                                                                                                                          | 29    |
| Outcome data             | 15* | Report numbers of outcome events or summary measures                                                                                                                                                         | 14-18 |
| Main results             | 16  | (a) Give unadjusted estimates and, if applicable, confounder-adjusted estimates and their precision (eg, 95% confidence interval). Make clear which confounders were adjusted for and why they were included | N/A   |
|                          |     | (b) Report category boundaries when continuous variables were categorized                                                                                                                                    | 18    |
|                          |     | (c) If relevant, consider translating estimates of relative risk into absolute risk for a meaningful time period                                                                                             | N/A   |
| Other analyses           | 17  | Report other analyses done—eg analyses of subgroups and interactions, and sensitivity analyses                                                                                                               | N/A   |
| <b>Discussion</b>        |     |                                                                                                                                                                                                              |       |
| Key results              | 18  | Summarise key results with reference to study objectives                                                                                                                                                     | 18    |
| Limitations              | 19  | Discuss limitations of the study, taking into account sources of potential bias or imprecision. Discuss both direction and magnitude of any potential bias                                                   | 23    |
| Interpretation           | 20  | Give a cautious overall interpretation of results considering objectives, limitations, multiplicity of analyses, results from similar studies, and other relevant evidence                                   | 18-20 |
| Generalisability         | 21  | Discuss the generalisability (external validity) of the study results                                                                                                                                        | 23    |
| <b>Other information</b> |     |                                                                                                                                                                                                              |       |
| Funding                  | 22  | Give the source of funding and the role of the funders for the present study and, if applicable, for the original study on which the present article is based                                                | 24    |

\*Give information separately for cases and controls in case-control studies and, if applicable, for exposed and unexposed groups in cohort and cross-sectional studies.

**Note:** An Explanation and Elaboration article discusses each checklist item and gives methodological background and published examples of transparent reporting. The STROBE checklist is best used in conjunction with this article (freely available on the Web sites of PLoS Medicine at <http://www.plosmedicine.org/>, Annals of Internal Medicine at <http://www.annals.org/>, and Epidemiology at <http://www.epidem.com/>). Information on the STROBE Initiative is available at [www.strobe-statement.org](http://www.strobe-statement.org).

# BMJ Open

## Prevalence and causes of anaemia in children aged 6-23 months in rural Qinghai, China: findings from a cross-sectional study

|                                 |                                                                                                                                                                                                                                                                                                                                                                                                                                                                                                                                                                                                                                                                                                                                               |
|---------------------------------|-----------------------------------------------------------------------------------------------------------------------------------------------------------------------------------------------------------------------------------------------------------------------------------------------------------------------------------------------------------------------------------------------------------------------------------------------------------------------------------------------------------------------------------------------------------------------------------------------------------------------------------------------------------------------------------------------------------------------------------------------|
| Journal:                        | <i>BMJ Open</i>                                                                                                                                                                                                                                                                                                                                                                                                                                                                                                                                                                                                                                                                                                                               |
| Manuscript ID                   | bmjopen-2019-031021.R2                                                                                                                                                                                                                                                                                                                                                                                                                                                                                                                                                                                                                                                                                                                        |
| Article Type:                   | Research                                                                                                                                                                                                                                                                                                                                                                                                                                                                                                                                                                                                                                                                                                                                      |
| Date Submitted by the Author:   | 02-Aug-2019                                                                                                                                                                                                                                                                                                                                                                                                                                                                                                                                                                                                                                                                                                                                   |
| Complete List of Authors:       | Huang, Yiwen; Capital Institute of Pediatrics, Department of Integrated Early Childhood Development<br>Wang, Lijuan; Chinese Center for Disease Control and Prevention National Institute for Nutrition and Health<br>Huo, Junsheng; Chinese Center for Disease Control and Prevention National Institute for Nutrition and Health<br>Wu, Qiong; Capital Institute of Pediatrics, Department of Integrated Early Childhood Development<br>Wang, Wei; Capital Institute of Pediatrics, Department of Integrated Early Childhood Development<br>Chang, Suying; UNICEF, Health and Nutrition, Water, Environment and Sanitation Section<br>Zhang, Yanfeng; Capital Institute of Pediatrics, Department of Integrated Early Childhood Development |
| <b>Primary Subject Heading</b>: | Nutrition and metabolism                                                                                                                                                                                                                                                                                                                                                                                                                                                                                                                                                                                                                                                                                                                      |
| Secondary Subject Heading:      | Nutrition and metabolism, Public health, Epidemiology                                                                                                                                                                                                                                                                                                                                                                                                                                                                                                                                                                                                                                                                                         |
| Keywords:                       | Anaemia < HAEMATOLOGY, Nutrition < TROPICAL MEDICINE, iron deficiency, children, China                                                                                                                                                                                                                                                                                                                                                                                                                                                                                                                                                                                                                                                        |
|                                 |                                                                                                                                                                                                                                                                                                                                                                                                                                                                                                                                                                                                                                                                                                                                               |

SCHOLARONE™  
Manuscripts

**ORIGINAL ARTICLE****Title page****Prevalence and causes of anaemia in children aged 6-23 months in rural Qinghai,****China: findings from a cross-sectional study**

Yiwen Huang<sup>1\*</sup>, B.Sci; Lijuan Wang<sup>2\*</sup>, PhD; Junsheng Huo<sup>2</sup>, PhD; Qiong Wu<sup>1</sup>, MSc; Wei Wang<sup>1</sup>, MSc; Suying Chang<sup>3</sup>, PhD; Yanfeng Zhang<sup>1</sup>, MSc

<sup>1</sup>Department of Integrated Early Childhood Development, Capital Institute of Pediatrics, Beijing, China

<sup>2</sup>Institute for Nutrition and Health, Chinese Center for Disease Control and Prevention, Beijing, China

<sup>3</sup>Health and Nutrition, Water, Environment and Sanitation Section, UNICEF China, Beijing, China

\*These authors contribute equally to this paper.

**Corresponding Author:**

Suying Chang, PhD

Health and Nutrition, Water, Environment and Sanitation Section, UNICEF China, Beijing, China

Address: 12, Sanlitun Lu, Beijing, 100600, P.R. China.

Phone: 8610 85312678

Fax: 8610 65323107

1  
2  
3  
4 Email: [schang@unicef.org](mailto:schang@unicef.org)  
5  
6  
7

8 Yanfeng Zhang, MSc  
9

10 Department of Integrated Early Childhood Development, Capital Institute of Pediatrics,  
11  
12 Beijing, China.  
13

14 Address: No. 2 Yabao Road, Chaoyang District, Beijing, 100020, P.R. China.  
15

16  
17 Phone: 8610 85695554  
18

19 Fax: 8610 85622025  
20

21 Email: [summyzh@126.com](mailto:summyzh@126.com)  
22  
23

24 **Key words:**

25  
26 Anaemia; iron deficiency; nutrition; children; China  
27  
28

29 **Word count:**

30  
31 4607  
32  
33  
34  
35  
36  
37  
38  
39  
40  
41  
42  
43  
44  
45  
46  
47  
48  
49  
50  
51  
52  
53  
54  
55  
56  
57  
58  
59  
60

## ABSTRACT

**Objective:** To investigate the current situation of anaemia among children aged 6-23 months in a rural county in China, and to explore the influencing factors and the main causes of anaemia.

**Design:** A cross-sectional study.

**Setting:** Huzhu County in Qinghai Province, China

**Participants:** We selected 38 sampled villages using Proportional to Population Size sampling method. We obtained the name list of children aged 6-23 months in each sampled village and planned to survey all the eligible children aged 6-23 months and their caregivers.

**Primary and secondary outcomes measures:** The prevalence of anaemia, the influencing factors of anaemia, the laboratory tests for biological causes of anaemia, including serum ferritin, sTfR, folic acid, Homocysteine and Vitamin B12.

**Results:** A total of 754 children aged 6-23 months and their caregivers were surveyed, and 183 anaemic children aged 12-23 months were collected venous blood sample. The anaemia prevalence of children aged 6-23 months in Huzhu County was 59.1%. Children of younger age (OR=0.968, 95%CI 0.940, 0.998), Tibetan nationality (OR=3.123, 95%CI 1.473,6.623) and not introducing meat (OR=0.698, 95%CI 0.499,0.976) were more likely to be anaemic. More than 80% of children with anaemia were due to iron deficiency, and 20.2% of them had both iron and folic acid deficiencies.



1  
2  
3  
4 **Conclusions:** The anaemia prevalence of children aged 6-23 months in Huzhu County  
5 was high and children of younger age, Tibetan nationality and not introducing meat  
6 were more likely to be anaemic. The main cause of anaemia was nutritional anaemia,  
7 with the vast majority being iron deficiency. Interventions of feeding counseling and  
8 nutrients supplements are appropriate and should be further strengthened.  
9  
10  
11  
12  
13

14  
15 **Strengths and limitations of this study:**  
16

- 17  
18  
19  
20  
21  
22  
23  
24  
25  
26  
27  
28  
29  
30  
31  
32
- In addition to the prevalence of anemia for young children, we also investigated the influencing factors and biological causes of anaemia through statistical analysis and laboratory tests to provide guidance for future program implementation.
  - The study took place only within one rural Chinese county and caution is needed when generalizing the findings from this study to other settings.
  - The sample size was relatively small.

33 **Trial registration number:** ChiCTRPRC12002444 (Feb 15th, 2016; Version1).  
34  
35  
36

37 **Main text**  
38  
39  
40  
41

42 **INTRODUCTION**  
43  
44

45 Childhood anaemia has long been a major public health problem worldwide. A  
46 systematic analysis of population-representative data suggested that anaemia  
47 prevalence in children younger than 5 years was 43% and there were 273 million  
48 children with anaemia globally in 2011<sup>1</sup>. The national anaemia prevalence in children  
49 under 5 in China fluctuated between 12% and 23% between 1990 and 2005 and then  
50 decreased from 19.3% in 2005 to 12.6% in 2010<sup>2</sup>. National Nutrition and Health  
51 Surveillance in 2013 showed that the prevalence of anaemia among children aged 0-  
52 5 years was 11.6% across the country, 10.6% in urban areas and 12.4% in rural areas  
53  
54  
55  
56  
57  
58  
59  
60

1  
2  
3  
4 respectively. However, huge regional differences exist, with rural Qinghai province  
5 being the highest (27.5%)<sup>3</sup>. In some rural areas, anaemia prevalence in children aged  
6 6-23 months was higher than 30%<sup>4,5</sup>.  
7  
8  
9

10  
11 In the public health perspective, anaemia is defined by the World Health Organization  
12 as a hemoglobin concentration 2 SDs below the mean hemoglobin concentration for  
13 a normal population of the same gender and the same age group<sup>6</sup>. Anaemia has  
14 irreversible adverse effects on childhood growth and development, even their  
15 working abilities in adulthood<sup>7</sup>. Many studies suggested an association between  
16 anaemia and impaired psychomotor development; impaired cognitive functions such  
17 as concentration, intellectual status, memory and scholastic skills; psychological and  
18 behavioral disorders such as attention-deficit/hyperactivity disorder (ADHD)<sup>8</sup> and  
19 autism spectrum disorder (ASD)<sup>9</sup>; decreased physical activity<sup>10</sup>. Meanwhile, anaemia  
20 has been confirmed to be associated with impaired renal function, increased  
21 absorption of lead, and impaired immunity<sup>11</sup>. The Global Burden of Disease (GBD)  
22 2000 report estimated that anaemia resulted in 68.4 million years lived with disability  
23 (YLD), accounting for 8.8% the total number of all cases of disability<sup>12</sup>, and the GBD  
24 2004 update had similar findings, which exerted a substantial economic burden<sup>13</sup>.  
25  
26  
27  
28  
29  
30  
31  
32  
33  
34  
35  
36  
37  
38  
39

40  
41 Our previous study in Qinghai Province found that the prevalence of anaemia in rural  
42 areas was much higher than the national average level. In 2012, the prevalence of  
43 anaemia among children aged 6-23 months in Huzhu, Minhe and Guinan County was  
44 71.1%, 56.1% and 86.3%, respectively<sup>14</sup>. We carried out a controlled interventional  
45 study in Huzhu and Guinan county from 2012 to 2014. And all children aged 6-23  
46 months in the intervention county, Huzhu County, received YingYangBao (a  
47 domestically produced multiple micronutrient powders for infants and young children)  
48 and their caregivers received infant feeding counseling from trained village doctors.  
49 The study found that the anaemia prevalence significantly decreased from 71.1% to  
50 47.8% in Huzhu County<sup>15</sup>. WHO defines the prevalence of anaemia in the population  
51  
52  
53  
54  
55  
56  
57  
58  
59  
60

1  
2  
3  
4 less than 20% as a mild public health problem, 20% to 40% as a moderate public health  
5  
6 problem, and the prevalence of anaemia in the population  $\geq$  40% as a serious public  
7  
8 health problem<sup>16</sup>. Therefore, childhood anaemia in Huzhu County is still a serious  
9  
10 public health problem in spite of the dramatic reduction of anaemia prevalence after  
11  
12 the study, and more efforts are needed to further decrease anaemia prevalence and  
13  
14 improve the nutrition status of children.  
15

16  
17 There are many reasons for anaemia: acute and chronic infections that result in  
18  
19 inflammation (including chronic blood loss caused by hookworm infection or  
20  
21 schistosomiasis); nutritional anaemia caused by iron deficiency and other  
22  
23 micronutrient deficiencies, especially of folic acid, vitamin B12 and vitamin A; and  
24  
25 genetically inherited traits such as thalassemia<sup>17</sup>. Although it is generally accepted  
26  
27 that nutrients deficiency is the leading cause of child anaemia, proportions of anaemic  
28  
29 causes in specific areas are usually unknown. Since interventions based on  
30  
31 improvement of child feeding and nutrients supplements are only effective for  
32  
33 nutritional anaemia, understanding the status of anaemia-related nutrients (iron, folic  
34  
35 acid and vitamin B12) is crucial to estimate the potential effectiveness of nutritional  
36  
37 interventions. The purpose of this study is to investigate the current situation of  
38  
39 anaemia among children aged 6-23 months in Huzhu County, and to explore the  
40  
41 influencing factors and the main causes of anaemia, so as to develop more appropriate  
42  
43 strategies for combating this intractable public health issue.  
44  
45

## 46 47 **METHODS**

### 48 49 **Study design**

50  
51 This study was conducted as a cross-sectional survey of children aged 6-23 months  
52  
53 and their caregivers in Huzhu County, Qinghai province. Proportional to Population  
54  
55 Size (PPS) sampling method was used to select sampled villages in the county. We first  
56  
57 obtained the name list of children aged 6-23 months in each sampled village and  
58  
59 aimed to survey all the eligible children aged 6-23 months and their caregivers. The  
60

1  
2  
3  
4 HemoCue Hb 301 analyzer (HemoCue, Lake Forest, CA, USA) was used to collect  
5 children's fingertip peripheral blood by using microcuvettes (for blood samples) to  
6 detect hemoglobin levels of children in the all sampled villages. After 4-7 days,  
7 anaemic children screened out by HemoCue Hb 301 analyzer were called to Huzhu  
8 Maternal and Child Health and Family Planning Service Center to draw venous blood  
9 sample for further blood routine test and laboratory tests.  
10  
11  
12  
13  
14  
15  
16

### 17 **Study setting**

18  
19 Qinghai Province lies in northwest China, with an area of around 720,000 km<sup>2</sup>. By the  
20 end of 2017, the resident population of the province was 5,838,000, of which the  
21 resident population of rural areas was 2,808,400, accounting for 46.9%, and the ethnic  
22 minority population was 2,854,900, accounting for 47.7%. Qinghai Province has 34  
23 counties and 439 townships. The Qinghai resident per capita disposable income in  
24 2017 was ¥9,462 (US\$1363.13)<sup>18</sup> for rural people, which was far lower than the  
25 national level (¥13,432(US\$1935.06))<sup>19</sup>.  
26  
27  
28  
29  
30  
31  
32  
33  
34

35 Huzhu County is located in the northeastern part of Qinghai Province and 27.9% of its  
36 population is part of an ethnic minority, which includes Tu, Tibetan, Hui and other 28  
37 ethnic minorities<sup>20</sup>. Huzhu County covers an area of 3,424 km<sup>2</sup>. The county governs  
38 19 townships with 294 villages, with a total population of 401,540, of which the rural  
39 population accounted for 76.0%. By the end of 2017, the resident per capita  
40 disposable income in the rural area was ¥9810 (US\$1414.91)<sup>21</sup>.  
41  
42  
43  
44  
45  
46  
47

### 48 **Participants**

49  
50 Children aged 6-23 months and their caregivers were invited to participate in this  
51 survey. We excluded children with a structural or genetic birth defect such as neural  
52 tube defects, congenital heart disease or phenylketonuria or caregivers who refused  
53 to participate.  
54  
55  
56  
57  
58  
59  
60

### Survey instrument

We used the adapted WHO Maternal, Newborn and Child Health Household Survey (World Health Organization, 2009) to collect household information and infant feeding practices in each sampled village.

### Sample size and Sampling

The sample size required were calculated based upon estimated anaemia prevalence in Huzhu County. We used the sample size calculation for proportion in single cross-sectional survey to estimate the sample for our study. Based on 35% of expected anaemia prevalence for children aged 6-23 months in Huzhu County, 5% of desired absolute precision, and 2 of design effect, we calculated the sample size of 699. Meanwhile, we also expected to draw 200 venous blood sample of anaemic children aged 12-23 months. According to the estimated anaemia prevalence of 35% in Huzhu County, we calculated that the total number of children aged 12-23 months needed was 571. We assumed that the number of children equally distributed in three age groups (6-11 months, 12-17 months, and 18-23 months), and calculated that 285 children aged 6-11 months were needed. Hence a sample size of 856 children aged 6-23 months was used in this study.

We knew the average number of children aged 6-23 months in each villages of Huzhu County from the local Maternal and Child Health Family Planning Service Centre. Proportional to Population Size (PPS) sampling method was used to select 38 sampled villages to meet our sample size requirements in the county. We obtained the name list of children aged 6-23 months in each sampled village and planned to survey all the eligible children and their caregivers.

### Training of Interviewers

Staff from the Capital Institute of Pediatrics in Beijing were supervisors for this survey, and 25 students were recruited from Qinghai Institute of Health Sciences as

1  
2  
3  
4 interviewers. We provided them training for two days before fieldwork, which  
5 included communication skills, explanation of questionnaires, demonstration, role  
6 plays, field practice, and group discussions. In addition, 4 of them were trained on  
7 measuring hemoglobin levels with a HemoCue Hb 301 analyzer. After the training, a  
8 half-day field practice was held in a village clinic. Any problems arising during the field  
9 practice were discussed and solved directly.  
10  
11  
12  
13  
14  
15  
16

### 17 **Data collection**

18  
19 We carried out the survey from July 23th to 27th 2018. In every surveyed township,  
20 staff notified the village doctors of the sample villages in advance, then the village  
21 doctor called the caregivers to take their children to the village clinic for investigation.  
22 Firstly, interviewers introduced the aim of the survey to the mothers or other  
23 caregivers and obtained written informed consent from them. Then the interviewers  
24 questioned them following the instructions.  
25  
26  
27  
28  
29  
30  
31  
32

33 We used smartphones with the household survey questionnaire set up in specially  
34 developed software to record data <sup>22</sup>. Four teams of interviewers carried out the  
35 survey, with 6 surveyors and 1 supervisor in each team. Data for each questionnaire  
36 were uploaded into an Excel database via the Internet server. Once the interview was  
37 completed, the special surveyor in each team measured hemoglobin with a HemoCue  
38 Hb 301 analyzer (HemoCue, Lake Forest, CA) by drawing around 10 ul finger blood.  
39  
40  
41  
42  
43  
44  
45

46 Children aged 12-23 months screened as anaemia by HemoCue Hb 301 analyzer were  
47 informed to go to the Huzhu County Maternal and Child Health Family Planning Service  
48 Centre for further tests from July 31 to August 1 2018. About 4-5ml venous blood of  
49 each children were collected by experienced nurses and placed into two tubes. The  
50 first 1-2ml blood sample was collected into a labeled EDTA-K2 coated tube for blood  
51 routine test using whole blood. And the second 3ml blood sample was collected  
52 (without removing the needle) into a labeled vacuum separating tube for serum  
53  
54  
55  
56  
57  
58  
59  
60

1  
2  
3  
4 ferritin(SF), soluble transferrin receptor(sTfR), C-reactive protein(CRP),  $\alpha$ -1 acid  
5 glycoprotein(AGP), vitamin B12, Homocysteine(HCY), and folic acid concentration  
6 using serum.  
7  
8  
9

10  
11  
12 Blood routine test and blood centrifugation were completed in the local laboratory.  
13  
14 The blood sample in labeled vacuum separating tubes were placed for 30 minutes,  
15 then were centrifuged at 1500 turn/minute for 15 minutes. The serum was separated  
16 into 1, 2 and 3 cryotubes using disposable pipettes.  
17  
18  
19

20  
21  
22 After the field work, all the blood samples were immediately stored at -70 °C and  
23 transported as soon as possible to Nutritional Institute for Institute for Nutrition and  
24 Health, China Center for Disease Control and Prevention for further laboratory testing.  
25 Repeated freezing and thawing were strictly avoided during transportation and  
26 storage.  
27  
28  
29  
30

### 31 32 33 **Laboratory analysis**

34  
35 The blood routine test was conducted using automatic blood cell analyzer (Horiba,  
36 ABX Micros 60-OT, France) in local laboratory. SF, vitamin B12 and serum folic acid  
37 were analyzed by Roche Cobas e601 analyzer (Germany) using  
38 electrochemiluminescence immunoassay (ECLIA). sTfR, CRP, AGP were analyzed by  
39 Hitachi 7600-110 chemistry autoanalyzer (Japan) using immunoturbidimetry and HCY  
40 was analyzed by Hitachi 7600-110 chemistry autoanalyzer (Japan) using enzymatic  
41 cycling assay.  
42  
43  
44  
45  
46  
47  
48  
49  
50

### 51 **Data management and statistical analysis**

52  
53 Data of questionnaires were automatically transformed and pooled into a Microsoft  
54 Excel sheet. After the data cleaning, we converted the database into a database file  
55 (dbf) for the final analysis.  
56  
57  
58  
59  
60

1  
2  
3  
4 We carried out statistical analysis with SAS 9.2 for Windows. The median (Q1, Q3) was  
5 used to describe the age in years of mothers and grandparents of children. Mean and  
6 standard deviation (SD) was used to describe the values of serum ferritin and body  
7 iron. Percentages were presented in binary or categorical variables. We used the  
8 Pearson  $\chi^2$ -test and Fisher exact test to compare binary and categorical variables.  
9  
10  
11  
12

13  
14  
15 Moreover, we carried out a logistic regression analysis to identify factors associated  
16 with children's anaemia in this survey. All relevant factors were first selected by  
17 univariate logistic analysis, including child's age, child's sex, parents' age, parents'  
18 nationality, parents' education, parents' job, whether parent worked outside the  
19 county, whether children aged 6-23 months had been given iron-rich or iron-fortified  
20 foods during last 24 hours, whether children aged 6-23 months had been given meat  
21 during last 24 hours, minimum dietary diversity, whether child had coughed, fever or  
22 diarrhea in the past two weeks, and whether children aged 6-23 months had been  
23 given YYB 5 bags or more. Only those that were significant in the final multivariate  
24 model are presented. We present Odds Ratios (OR) and 95% confidence intervals (CI)  
25 and considered two-tailed P-values of  $<0.05$  for a significant difference.  
26  
27  
28  
29  
30  
31  
32  
33  
34  
35  
36  
37  
38

39 We calculated the feeding practice indicators based on the WHO guideline "Indicators  
40 for Assessing Infant and Young Child Feeding Practices"<sup>23</sup>, which based on the 24 hour  
41 recall method. And all individual hemoglobin values were adjusted using WHO  
42 recommendations based on the altitude of the surveyed villages where children lived.  
43 An adjusted hemoglobin lower than 110g/L<sup>16</sup> was defined as anaemia and was used  
44 to calculate the prevalence of anaemia. A hemoglobin concentration of 90–110 g/L  
45 was defined as mild anaemia,  $<90$  g/L as moderate anaemia or severe anaemia. Cut-  
46 offs for elevated CRP and AGP were  $>5$ mg/L and  $>1$ mg/L, respectively<sup>24</sup>. If one of  
47 these two indicators were elevated, the children surveyed were classified as infected  
48 children. Serum ferritin concentration  $<12$ ug/L and  $<30$ ug/L were used to define iron  
49 deficiency in non-infected children and infected children, respectively. The children  
50  
51  
52  
53  
54  
55  
56  
57  
58  
59  
60



1  
2  
3  
4 with concurrent anaemia and iron deficiency were diagnosed with iron deficiency  
5 anaemia<sup>25</sup>. A plasma folic acid concentration of <4ng/ml was used to define folic acid  
6 deficiency according to WHO guidelines<sup>26</sup>. Vitamin B12 deficiency was defined as  
7 <197pg/ml. Cut-offs for elevated sTfR and HCY were 8.3mg/L<sup>27</sup> and 14umol/l,  
8 respectively<sup>28</sup>.

9  
10  
11  
12  
13  
14  
15 Body iron stores (BI) were estimated by applying Cook's formula as follows: body  
16 iron(mg/kg) =-[log(R/F ratio)-2.82290]/0.1207. The R/F ratio was soluble transferrin  
17 receptor(sTfR)/ serum ferritin (SF)<sup>29</sup>. Among them, sTfR needs to be transformed by  
18 the following formula: Flowers sTfR=1.5 \* Roche sTfR +0.35mg/L<sup>30</sup>. The positive value  
19 means iron surplus in stores and the negative value means iron deficit in tissues.

### 20 21 22 23 24 25 26 27 **Ethical considerations**

28  
29 The study was approved by the Ethics Committee of the Capital Institute of Pediatrics  
30 (reference no.2018017). All interviewees read the Information Sheet and provided  
31 written consent on behalf of the children involved in our study.

### 32 33 34 35 36 37 **Participant and public involvement**

38  
39 The participants and the public were not involved in the design, recruitment and  
40 conduct of the study. There are no plans to disseminate the study findings to the study  
41 participants.

## 42 43 44 45 46 47 **RESULTS**

48  
49 The flowing chart of this study is shown in **Figure 1**. Among 912 children aged 6-23  
50 months on the name list, a total of 754 children and their caregivers were surveyed,  
51 with 444 being anaemic. There were 183 children aged 12-23 months agreed to draw  
52 venous blood for further laboratory tests, and 52 of them were found acute and/or  
53 chronic infections (CRP > 5 mg/L in blood routine test or AGP > 1 g/L in laboratory  
54  
55  
56  
57  
58  
59  
60

test). Besides, there was no statistical difference between 183 children aged 12-23 months who were taken venous blood and 101 children who refused to draw venous blood (Supplementary Table 1).

Characteristics of 754 surveyed children and their caregivers are shown in **Table 1**. Nearly all main caregivers of the children surveyed were mothers and grandparents, and about 70% of mothers were Han nationality, followed by Tu and Tibetan nationality. More than 60% of mother attended junior high school, and the proportion of mothers who were illiterate was only 4.0%. More than half of grandparents were still illiterate. The main source of household income was working outside the county, followed by agriculture-related work such as growing crops, vegetables and animal husbandry.

**Table1 Characteristics of surveyed children and their caregivers (N=754)**

| Characteristic                 | Percentage or median |
|--------------------------------|----------------------|
| <b>Children</b>                |                      |
| Age, %(n)                      |                      |
| 6-11months                     | 32.8(247)            |
| 12-17months                    | 32.6(246)            |
| 18-23months                    | 34.6(261)            |
| Sex, %(n)                      |                      |
| Boy                            | 52.1(393)            |
| Girl                           | 47.9(361)            |
| <b>Main caregivers, %(n)</b>   |                      |
| Mother                         | 48.7(367)            |
| Grandparent                    | 46.4(350)            |
| Father                         | 4.8(36)              |
| Other                          | 0.1(1)               |
| <b>Mothers</b>                 |                      |
| Age in years (median (Q1, Q3)) | 29(26,31)            |
| Nationality, %(n)              |                      |
| Han                            | 69.9(523)            |
| Tu                             | 22.8(171)            |

|                               |           |
|-------------------------------|-----------|
| Tibetan                       | 6.3(47)   |
| Hui                           | 0.3(2)    |
| Others                        | 0.7(5)    |
| <b>Education, %(n)</b>        |           |
| Illiterate                    | 4.0(30)   |
| Primary school                | 13.8(103) |
| Junior high school            | 61.6(461) |
| Senior high school or above   | 17.4(130) |
| Do not know                   | 3.2(24)   |
| <b>Grandparents</b>           |           |
| Age in year (median (Q1, Q3)) | 54(50,59) |
| <b>Education, %(n)</b>        |           |
| Illiterate                    | 60.3(211) |
| Primary school                | 22.6(79)  |
| Junior high school            | 15.1(53)  |
| Senior high school            | 1.1(4)    |
| Do not know                   | 0.9(3)    |
| <b>Household income, %(n)</b> |           |
| Working outside the county    | 89.2(673) |
| Agriculture-related work      | 6.4(48)   |
| Self-employed                 | 2.9(22)   |
| Others                        | 1.2(9)    |
| Do not know                   | 0.3(2)    |

**Table 2** shows the prevalence of anaemia and hemoglobin levels by age and severity in this survey. Most of anaemic children were mildly anaemic, accounting for 76.9% of the total. The prevalence of anaemia in the 18 to 23-month group was significantly lower than that in the 6 to 11-month group ( $p=0.0026$ ) and the 12 to 17-month group ( $p=0.0261$ ). The median hemoglobin levels in the 6 to 11-month group and 12 to 17-month group were lower than that in the 18 to 23-month group (116g/L vs. 121 g/L,  $p<0.0001$  and  $p=0.0004$  respectively).

**Table 2 Prevalence of anaemia and hemoglobin level by age and severity**

|         | Anaemia prevalence ( N=751 ) * |                    |           | Hemoglobin level<br>(median, (Q1, Q3)) |
|---------|--------------------------------|--------------------|-----------|----------------------------------------|
|         | Mild anaemia                   | Moderate or severe | Total     |                                        |
|         | (%, n)                         | anaemia (%, n)     | (%, n)    |                                        |
| 6-11m   | 49.8(123)                      | 15.0(37)           | 64.8(160) | 116(106,125)                           |
| 12-17 m | 51.2(126)                      | 10.2(25)           | 61.4(151) | 116(107,125)                           |
| 18-23 m | 43.4(112)                      | 8.1(21)            | 51.6(133) | 121(111,130)                           |
| Total   | 48.1(361)                      | 11.1(83)           | 59.1(444) | 117(108,127)                           |

\*Three children refused to measure hemoglobin.

**Table 3** shows the results of a univariate logistic analysis of anaemia prevalence in this survey. Older children were less likely to suffer from anaemia than younger children ( $p=0.0028$ ). The prevalence of anaemia in children with Tibetan nationality was significantly higher than those with Han nationality ( $p=0.0016$ ). The prevalence of anaemia in children who consumed iron-rich or iron-fortified foods was significantly lower than that in children who did not consume these foods ( $p=0.0150$ ). The prevalence of anaemia in children who were given meat was also significantly lower than that in children without meat ( $p=0.0077$ ). Furthermore, the anaemia prevalence of children achieving minimum dietary diversity was significantly lower than that of children who did not meet the standard ( $p=0.0163$ ).

**Table3 Univariate logistic analysis of the prevalence of anaemia**

| Factors                                      | Sample | Case | Anaemia prevalence | $p$ -value |
|----------------------------------------------|--------|------|--------------------|------------|
| Child's age                                  |        |      |                    | 0.0028     |
| Nationality                                  |        |      |                    |            |
| Han                                          | 521    | 291  | 55.9               |            |
| Hui                                          | 2      | 0    | 0                  | 0.9799     |
| Tu                                           | 170    | 108  | 63.5               | 0.0836     |
| Tibetan                                      | 47     | 38   | 80.9               | 0.0016     |
| Other                                        | 5      | 3    | 60.0               | 0.8570     |
| Children aged 6-23 months given iron-rich or |        |      |                    |            |

---

 iron-fortified food during the last 24 hours

|     |     |     |      |        |
|-----|-----|-----|------|--------|
| Yes | 475 | 265 | 55.8 | 0.0150 |
| No  | 276 | 179 | 64.9 |        |

## Children aged 6-23 months

## given meat during the last 24 hours

|     |     |     |      |        |
|-----|-----|-----|------|--------|
| Yes | 210 | 108 | 51.4 | 0.0077 |
| No  | 541 | 336 | 62.1 |        |

## Minimum dietary diversity during the last 24 hours

|     |     |     |      |        |
|-----|-----|-----|------|--------|
| Yes | 364 | 199 | 54.7 | 0.0163 |
| No  | 387 | 245 | 63.3 |        |

---

## Note:

<sup>1</sup> Children aged 6-23 months given iron-rich or iron-fortified foods during the last 24 hours: the proportion of children aged 6–23 months had been given iron-rich food or iron fortified food during the last 24 hours that was specially designed for infants and young children, or that was fortified in the home. Iron-rich or iron-fortified foods include flesh foods, commercially fortified foods specially designed for infants and young children which contain iron, or foods fortified in the home with a micronutrient powder containing iron or a liquid-based nutrient supplement containing iron, but not iron tablets.

<sup>2</sup> Children aged 6-23 months given meat during the last 24 hours: the proportion of children aged 6–23 months had been given meat during the last 24 hours that include beef, pork, lamb or other meat and liver, kidney, heart, or other organ meats, and fresh or dried fish, etc.

<sup>3</sup> Minimum dietary diversity during the last 24 hours: the proportion of children aged 6-23 months who received foods from four or more food groups during last 24 hours. The food groups were: a) grains, root and tubers; b) legumes and nuts; c) dairy products (milk, yogurt, cheese); d) meat (meat, fish, poultry and liver/organ meat); e) eggs; f) vitamin-A rich fruits and green vegetables; g) other fruits and vegetables.

The results of multivariate logistic analysis of anaemia prevalence in surveyed children is shown in **Table 4**. Older children (OR=0.968, 95%CI 0.940, 0.998) and those consuming meat (OR=0.698, 95%CI 0.499,0.976) were associated with lower anaemia

levels, whereas children of Tibetan nationality (OR=3.123, 95%CI 1.473,6.623) were more likely to be anaemic.

**Table 4 Multivariate logistic analysis of anaemia prevalence**

| Independent variable | Influential factors of anaemia |        |          |                    |
|----------------------|--------------------------------|--------|----------|--------------------|
|                      | $\beta$                        | Wald   | <i>P</i> | OR (95%CI)         |
| Child' age           | -0.0321                        | 4.4930 | 0.0340   | 0.968(0.940,0.998) |
| Nationality          |                                |        |          |                    |
| Hui –Han             | -13.6385                       | 0.0006 | 0.9797   | <0.001             |
| Tu-Han               | 0.3038                         | 2.7371 | 0.0980   | 1.335(0.945,1.942) |
| Tibetan-Han          | 1.1388                         | 8.8166 | 0.0030   | 3.123(1.473,6.623) |
| Other-Han            | 0.0294                         | 0.0010 | 0.9745   | 1.030(0.169,6.260) |
| Introduction of meat | -0.3595                        | 4.4118 | 0.0357   | 0.698(0.499,0.976) |

Results of the laboratory tests for 183 children are shown in **Table 5**. There were 113 children with iron deficiency, accounting for 61.7%. The mean serum ferritin concentration in anaemic children was significantly lower than that in non-anaemic children ( $10.2 \pm 9.6\text{ng/mL}$  vs.  $22.6 \pm 15.9\text{ng/mL}$ ,  $p < 0.0001$ ). The body iron store in anaemic children was significantly lower than that in non-anaemic children ( $-3.1 \pm 4.4\text{mg/kg}$  vs.  $2.1 \pm 3.3\text{mg/kg}$ ,  $p < 0.0001$ ). 32.6% of children with anaemia had elevated sTfR, significantly higher than that in children without anaemia (4.3%,  $p < 0.0001$ ). At the same time, the proportion of folic acid deficiency in anaemic children was also significantly higher than that in non-anaemic children (20.2% vs. 5.3%,  $p = 0.0024$ ). There was no vitamin B12 deficiency either in anaemic or non-anaemic children.

**Table 5 Results of laboratory tests**

|                      | Anaemic children<br>(N=89) | Non-anaemic<br>children<br>(N=94) | Total<br>(N=183) | <i>p</i> |
|----------------------|----------------------------|-----------------------------------|------------------|----------|
| Serum ferritin(ug/L) |                            |                                   |                  |          |

|                                                                               |            |             |              |         |
|-------------------------------------------------------------------------------|------------|-------------|--------------|---------|
| Mean ± SD                                                                     | 10.2 ± 9.6 | 22.6 ± 15.9 | 16.6 ± 14.6  | <0.0001 |
| <12ug/L for non-infected children or<br><30ug/L for infected children (% , n) | 80.9% (72) | 43.6% (41)  | 61.7% (113)  | <0.0001 |
| sTfR (>8.3mg/L) (% , n)                                                       | 32.6% (29) | 4.3% (4)    | 18.0% (33)   | <0.0001 |
| Body iron store (mean ± SD)                                                   | -3.1 ± 4.4 | 2.1 ± 3.3   | -0.45 ± 4.56 | <0.0001 |
| Folic acid (<4ng/mL) (% , n)                                                  | 20.2% (18) | 5.3% (5)    | 12.6% (23)   | 0.0024  |
| Vitamin B12 (<197pg/mL) (% , n)                                               | 0.0% (0)   | 0.0% (0)    | 0.0% (0)     | -       |
| Homocysteine (>14umol/L) (% , n)                                              | 4.5% (4)   | 1.1% (1)    | 2.7% (5)     | 0.1425  |

**Figure 2** shows biological causes of anaemia. 80.9% of children with anaemia were due to iron deficiency, and 20.2% of them had both iron and folic acid deficiencies. The biological causes of 19.1% anaemic children were unknown.

## DISCUSSION

### Main findings

The anaemia prevalence of children aged 6-23 months in Huzhu County was 59.1% and most of them were mildly anaemic. The prevalence of anaemia in the 18 to 23month group was significantly lower than that in the 6 to 11month group ( $p=0.0026$ ) and the 12 to 17month group ( $p=0.0261$ ). Meanwhile, children of younger age, Tibetan nationality and not introducing meat were more likely to be anaemic. 80.9% of children with anaemia were due to iron deficiency, and 20.2% suffered from both iron deficiency and folic acid deficiency. The prevalence of iron deficiency among all children was 61.7% and 43.6% of non-anaemic children also had iron deficiency. Body iron stores in all children tested averaged  $-0.45\pm 4.56$  mg/kg. The proportion of microcytic hypochromic anaemia (MCH, MCV and MCHC were lower than normal value) was 13.1%. And the specificity of the combination of MCV + MCH + MCHC in the diagnosis of iron deficiency anaemia was 100%, but its sensitivity was only 17.8%.

### **Influencing factors of anaemia**

Children aged 6-11 months are in the transition period from exclusive breastfeeding to complementary feeding, during which the storage iron from birth is depleted and complementary foods become the main source of iron, and they were more likely to suffer from anaemia. In our study, anaemia prevalence of children at this age is the highest (64.8%).

Our analysis showed that eating meat was a protective factor of child anaemia, however, few caregivers gave meat to their children of this age due to the wrong beliefs that they could not digest meat. In addition, some caregivers did not know how to prepare meat for young infants, especially at the very beginning of complementary feeding<sup>31</sup>, thus infant feeding counseling should include these specific issues to provide caregivers accurate knowledge and help them solve problems, such as demonstration of the preparation of meat instead of just giving information.

Compared with other nationalities, children of Tibetan nationality, who accounted for about 10% in Huzhu County, were more likely to be anaemic<sup>14</sup>, probably because their special customs and dietary habits with the main complementary food for children being zanba (a local ethnic food consisting mainly of carbohydrates) and porridge, which contain very few irons<sup>32,33</sup>. At the same time, poor family economic conditions would also make it unaffordable to feed animal food to their children<sup>34</sup>.

### **Laboratory indicators for assessment of iron status**

Our study found that 80.9 % of anaemic children had iron deficiency assessed by serum ferritin, but only 32.6% of these children had increased sTfR, which indicated the inconsistency of these two laboratory tests.

The World Health Organization issued guidelines on serum ferritin cut-off for the



1  
2  
3  
4 assessment of iron status<sup>25</sup>, which are widely used in nutrition surveys and researches  
5  
6 in different countries. However, using sTfR to assess iron status is still controversial,  
7  
8 as there is no internationally agreed cut-off for sTfR at present. Therefore, we mainly  
9  
10 used ferritin to assess iron deficiency in our study.

11  
12  
13 Literatures showed that the cut-off for sTfR used in the age group of children under  
14  
15 three years old are varied, such as 3.3mg/L, 4.6mg/L and 8.3mg/L<sup>35-36,27</sup>. A study  
16  
17 conducted in Kenya showed that the threshold of 8.3mg/L was better to assess the  
18  
19 prevalence of iron deficiency in children aged 6-35 months (sensitivity 92.0%,  
20  
21 specificity 96.0%). Therefore, we used cut-off 8.3mg/L in our study.

22  
23  
24  
25 Ferritin and sTfR reflect different stage of iron deficiency. We found that the results of  
26  
27 serum ferritin and sTfR were not consistent in children aged 12-23 months. Further  
28  
29 studies should be conducted to clarify the exact relationship between serum ferritin  
30  
31 and sTfR in children and to explore a more effective combination of indicators to  
32  
33 assess population iron status.

### 34 35 36 37 **The biological causes of anaemia**

38  
39 The biological causes of anaemia can generally be summarized into three categories:  
40  
41 nutritional anaemia, infectious diseases and genetic hemoglobin disorders. Nutritional  
42  
43 anaemia results from insufficient bioavailability of hemopoietic nutrients (iron,  
44  
45 vitamin B12, vitamin A and folic acid) needed to meet the demands of hemoglobin  
46  
47 and erythrocyte synthesis and decreased absorption enhancers such as vitamin C.  
48  
49 Infectious diseases include soil-transmitted helminths, malaria and schistosomiasis.  
50  
51 Genetic hemoglobin disorders include thalassemia and hemoglobin variants etc<sup>17</sup>.  
52  
53 Many previous studies have found that iron deficiency may be the most common  
54  
55 cause of anaemia <sup>1, 6, 17, 37</sup>. Our study confirmed that 80.9% of anaemic children aged  
56  
57 12-23 months in Huzhu County were due to iron deficiency. The prevalence of iron  
58  
59 deficiency among all children was 61.7% and body iron stores in all children tested  
60

1  
2  
3  
4 averaged only  $-0.45 \pm 4.56$  mg/kg.  
5  
6

7  
8 Iron deficiency (ID) is a state in which iron is insufficient to maintain normal  
9  
10 physiological functions of tissues such as blood, brain, and muscle. If iron deficiency  
11  
12 lasts too long or is serious enough, it can result in iron deficiency anaemia (IDA)<sup>6</sup>. In  
13  
14 addition to the important role of oxygen carrier in the heme group of hemoglobin,  
15  
16 iron also exists in many key proteins in cells, such as cytochromes, myoglobin, neural  
17  
18 transmitters, various enzymes and coenzymes<sup>38</sup>. Therefore, iron deficiency not only  
19  
20 causes anaemia, but also has many other adverse effects, especially on children in  
21  
22 growth and development.  
23

24  
25 Iron deficiency is often found in association with a deficiency of folic acid. Combined  
26  
27 folic and iron deficiency may occur in preterm infants who are fed unfortified formula  
28  
29 based on evaporated milk. Other study indicated that infants fed on goat's milk were  
30  
31 also at risk<sup>39</sup>. Our study found that 20.2% of children suffered from both iron  
32  
33 deficiency and folic acid deficiency. Hence, attentions also need to be paid to the  
34  
35 deficiency of folic acid. There was no vitamin B12 deficiency either in anaemic or non-  
36  
37 anaemic children tested. However, biological causes of the remaining 19.1% of  
38  
39 anaemic children were still unknowns and may need further explorations.  
40  
41

#### 42 43 **Recommendations on reducing nutritional anaemia**

44  
45 Deficiencies of iron and folic acid were the main biological causes of children's  
46  
47 anaemia in Huzhu County, therefore, feeding counseling and nutrients supplements,  
48  
49 as biological interventions, are appropriate and should be further strengthened.  
50  
51

52  
53 (1) Improving traditional delivery channels for infant and young child feeding (IYCF)  
54  
55 nutrients supplements (YYB program).  
56

57  
58 IYCF is one of the key strategies to lower the risk of iron-deficiency anaemia in early  
59  
60 infancy<sup>17, 40</sup>. Previous studies found that inappropriate IYCF practices were common in

1  
2  
3 many rural areas in China<sup>41,42</sup>, for instance, complementary foods generally contained  
4 mainly carbohydrates and lacked protein and fat<sup>43</sup>, or were introduced to children too  
5 early or too late, or were given in too small amounts or not frequently enough<sup>44,45</sup>.  
6  
7  
8  
9

10  
11 Nutrients supplements have been commonly accepted as effective interventions in  
12 reducing child anaemia worldwide<sup>15, 46-51</sup>. In China, a domestically produced multi-  
13 nutrient powders (MNPs) for infants and young children called Ying Yang Bao (YYB)  
14 was developed, and a study conducted in Gansu Province from 2001 to 2004 to test  
15 the effectiveness of this complementary food supplement, showed that the use of YYB  
16 could significantly reduce the anaemia prevalence<sup>48</sup>.  
17  
18  
19  
20  
21  
22  
23

24  
25 The information-motivation-behavior skills (IMB) model indicates that information  
26 can be transformed into action that can motivate individuals and eventually influence  
27 their attitudes and behaviors<sup>52,53</sup>. In China, information and knowledge about infant  
28 feeding was mainly disseminated through the traditional rural three-tier healthcare  
29 system (county-township-village). Village doctors were responsible to provide face-to-  
30 face infant and young child feeding counseling to caregivers<sup>14, 54</sup>. We conducted a  
31 controlled interventional study in Huzhu and Guinan County from 2012 to 2014,  
32 training village doctors to provide IYCF counseling and disseminating YYB to caregivers,  
33 and the results showed that the anaemia prevalence decreased more in the  
34 intervention county (receiving IYCF counseling and YYB) than in the control county(not  
35 receiving IYCF counseling and YYB, 71.1% to 47.8% vs. 86.3% to 75.3%, respectively)<sup>15</sup>.  
36 We also found an improvement of caregivers' feeding practice<sup>15</sup>. Therefore, we should  
37 continue making use of the traditional health information dissemination system and  
38 measures need to be taken to further improve the quality of services, for example,  
39 conducting regular refresh training and supervision, providing monetary incentives to  
40 village doctors, and more importantly, tailoring IYCF information to the local feeding  
41 problems and special dietary habits instead of barely giving general knowledge.  
42  
43  
44  
45  
46  
47  
48  
49  
50  
51  
52  
53  
54  
55  
56  
57  
58  
59  
60

1  
2  
3  
4 (2) Exploring new channels for delivering IYCF information and disseminating YYB.  
5

6 Although traditional delivery channels (mainly by village doctors) proved to be  
7 effective in our previous study, the key IYCF indicators were still low and the YYB  
8 compliance needed to be further improved<sup>55</sup> to increase the effectiveness of the  
9 interventional program. In addition, the sustainability of the YYB programs could also  
10 be an issue since the anaemia prevalence in Huzhu County went up from 47.8% in  
11 2014 to 59.1% in 2018. Therefore, we need to explore new channels for delivery these  
12 interventions.  
13  
14  
15  
16  
17  
18  
19  
20

21 Nowadays, mobile phones and the Internet have spread to millions of households in  
22 China. Data showed that, by the end of 2017, there were 1417.49 million mobile  
23 phone users and 772 million Internet users, of which 753 million were smartphone  
24 Internet users. The Internet penetration rate reached 55.8%, of which 35.4% was in  
25 rural areas<sup>19</sup>. Social media and smartphones have become new channels for  
26 information acquisition, and these have been widely used in many health education  
27 researches<sup>56-58</sup>. A systematic review proved the feasibility of delivering eHealth  
28 interventions to improve health literacy skills among people with different health  
29 conditions, risk factors and socio-economic backgrounds<sup>59</sup>. However, using eHealth or  
30 mHealth methods to deliver complementary feeding information in China is rarely  
31 reported. Therefore, further studies are needed to assess the feasibility and  
32 effectiveness of such delivery channels in improving IYCF knowledge and practice as  
33 well as YYB compliance in rural China.  
34  
35  
36  
37  
38  
39  
40  
41  
42  
43  
44  
45  
46  
47  
48

## 49 **CONCLUSIONS**

50  
51 The anaemia prevalence of children aged 6-23 months in Huzhu County was 59.1%  
52 and children of younger age, Tibetan nationality and not introducing meat were more  
53 likely to be anaemic. 80.9% of children with anaemia were due to iron deficiency, and  
54 20.2% of them suffered from both iron and folic acid deficiencies. Therefore, previous  
55  
56  
57  
58  
59  
60

1  
2  
3 interventions of feeding counseling and nutrients supplements are appropriate and  
4 should be further strengthened.  
5  
6  
7  
8  
9

### 10 **Acknowledgments**

11  
12 The authors wish to thank all colleagues from the Huzhu Maternal and Child Health  
13 and Family Planning Service Center for coordination, logistic arrangements and blood  
14 routine tests, and we want to thank all students from Qinghai Institute of Health  
15 Sciences for their hard work as interviewers. We are indebted to all the mothers and  
16 caregivers who participated in our survey.  
17  
18  
19  
20  
21  
22  
23

### 24 **Authorship statement**

25  
26 The study was initiated, conceptualized, and supervised by JSH, SYC and YFZ. LJW,  
27 YWH, QW and WW collected and analyzed data. LJW conducted laboratory tests. YFZ,  
28 YWH, and QW participated in the explanation and discussion of the results. The  
29 manuscript was drafted by YWH, reviewed and revised by YFZ, QW, SYC and JSH. All  
30 authors read and approved the final manuscript.  
31  
32  
33  
34  
35  
36  
37  
38

### 39 **Funding**

40  
41 The survey was funded by the United Nations Children's Fund (UNICEF). The founder  
42 was involved in study design, data interpretation, preparation of the manuscript, and  
43 decision to publish.  
44  
45  
46  
47  
48  
49

### 50 **Competing interests**

51  
52 None declared.  
53  
54  
55

### 56 **Data showing statement**

57  
58 Extra data can be accessed via the Dryad data repository at <http://datadryad.org/> with  
59  
60

1  
2  
3  
4 the doi:10.5061/dryad.57v2100  
5  
6

## 7 REFERENCES

- 8 1. Stevens GA, Finucane MM, De-Regil LM, Paciorek CJ, Flaxman SR, Branca F, Peña-Rosas JP, Bhutta  
9 ZqA, Ezzati M: Global, regional, and national trends in haemoglobin concentration and prevalence  
10 of total and severe anaemia in children and pregnant and non-pregnant women for 1995–2011:a  
11 systematic analysis of population-representative data. *Lancet Glob Health* 2013, 1:e16-25.  
12
- 13 2. Ministry of Health China. People Republic of China. National report on national status of children  
14 aged 0-6 year. Beijing: Ministry of China; 2012.
- 15 3. Fang HY, Yu DM, Guo QY, Ju LH, Xu XL, Yu WT, Jia FM, Zhao LY: Anaemia prevalence of among 0 –  
16 5 years old children in China, 2013. *Chin J Public Health*. vol. 34; 2018: 1654-1657.  
17
- 18 4. Liu S, Li J, Gong CR, Wei CM, Li XZ, Song Y: Prevalence of anaemia among infants and young  
19 children in rural areas of Hubei province. *Chin J Public Health* 2013, 30(7):899-902.  
20
- 21 5. Yu CY, Ban WF, Xie L, Wei P, Lan S, Q, Shen L, Yang YJ, Wang CB:  
22 Prevalence and influence factors of iron deficiency anaemia among 6-23 months old children in  
23 Qiannan area of Guizhou province. *Chin J Public Health* 2018, 34(6):812-816.  
24
- 25 6. World Health Organization. Iron Deficiency Anaemia Assessment, Prevention and Control. A  
26 Guide for Program Managers. vol. WHO/NHD/01.3. Geneva, Switerland: World Health  
27 Organization; 2001.
- 28 7. Horton S, Ross J: The economics of iron deficiency. *Food Policy* 2003, 28:51-75.  
29
- 30 8. Tseng PT, Cheng YS, Yen CF, Chen YW, Stubbs B, Whiteley P, Carvalho AF, Li DJ, Chen TY, Yang WC  
31 et al: Peripheral iron levels in children with attention-deficit hyperactivity disorder: a systematic  
32 review and meta-analysis. *Sci Rep* 2018, 8(1):788.  
33
- 34 9. Hergüner S, Keleşoğlu FM, Tanıdır C, Cöpür M: Ferritin and iron levels in children with autistic  
35 disorder: Hergüner S, Keleşoğlu FM, Tanıdır C, et al. Ferritin and iron levels in children with autistic  
36 disorder. *Eur J Pediatr*. 2012;171(1)143-6.  
37
- 38 10. Pivina L, Semenova Y, Dosa MD, Dauletyarova M, Bjorklund G: Iron Deficiency, Cognitive  
39 Functions, and Neurobehavioral Disorders in Children. *J Mol Neurosci* 2019.
- 40 11. Sarah K W, Randi S: Pediatric Screening. *Primary Care: Clinics in Office Practice* 2019, 46(1):69-  
41 84.  
42
- 43 12. Colin D. M, Claudia S, Doris MF, Chalapati R, Mie I, Niels T, Christina B, Alan DL, Christopher J.L.  
44 M: Global Burden of Disease 2000: Version 2 methods and results. In: *Global Programme on  
45 Evidence for Health Policy Discussion Paper* Geneva, Switzerland: World Health Organization;  
46 2002: No 50.  
47
- 48 13. World Health Organization: *The Global Burden of Disease - 2004 Update*. Geneva: Switzerland:  
49 World Health Organization; 2008.
- 50 14. Zhang YF, Wu Q, Wang W, Han HJ, Chen L, Chang SY: Investigation and analysis of infant feeding  
51 and nutrition status of 6-23 months Children in rural areas of Qinghai Province. *Maternal and  
52 Child Health Care of China* 2016, 31(13):2712-2717.  
53
- 54 15. Zhang YF, Wu Q, Wang W, van Velthoven MH, Chang SY, Han HJ, Xing M, Chen L, Scherpbier RW:  
55 Effectiveness of complementary food supplements and dietary counselling on anaemia and  
56 stunting in children aged 6-23 months in poor areas of Qinghai Province, China: a controlled  
57 interventional study. *BMJ Open* 2016, 6(10):e011234.  
58  
59  
60

16. World Health Organization: Haemoglobin concentrations for the diagnosis of anaemia and assessment of severity. Geneva: World Health Organization; 2011.
17. Balarajan Y, Ramakrishnan U, Özaltın E, Shankar AH, Subramanian SV: Anaemia in low-income and middle-income countries. *Lancet* 2011(378):2123-2135.
18. Qinghai Bureau of Statistics. Qinghai Statistics Year Book 2017. Beijing: China Statistics Press; 2018.
19. National bureau of Statistics. Statistical Communiqué of the People's Republic of China on 2017 National Economic and Social Development. Beijing: National bureau of Statistics; 2018.
20. People's Government of Huzhu County. Introduction of Huzhu County. Huzhu County, Qinghai Province.[website in chinese]. Available: <http://www.huzhu.gov.cn/contents/197/9551.html>. Accessed: 5 February 2019.
21. People's government of Huzhu County. 2017 government report of Huzhu County. Huzhu County, Qinghai Province.[website in chinese]. Available: <http://www.huzhu.gov.cn/contents/211/10406.html>. Accessed: 5 February 2019.
22. Zhang S, Wu Q, van Velthoven MH, Chen L, Car J, Rudan I, Zhang Y, Li Y, Scherpbier RW: Smartphone versus pen-and-paper data collection of infant feeding practices in rural China. In: *J Med Internet Res*. vol. 14; 2012: e119.
23. World Health Organization: Indicators for assessing infant and young child feeding practices part 2: measurement. Geneva: World Health Organization; 2010. Available from: [http://whqlibdoc.who.int/publications/2010/9789241599290\\_eng.pdf?ua=1](http://whqlibdoc.who.int/publications/2010/9789241599290_eng.pdf?ua=1).
24. Thurnham DI, McCabe GP, Northrop-Clewes CA, Nestel P: Effects of subclinical infection on plasma retinol concentrations and assessment of prevalence of vitamin A deficiency: meta-analysis. *Lancet* 2003, 362(9401):2052-2058.
25. World Health Organization: Serum ferritin concentrations for the assessment of iron status and iron deficiency in populations. Vitamin and Mineral Nutrition Information System(WHO/NMH/NHD/MNM/11.2). Geneva: World Health Organization; 2011.
26. World Health Organization: Serum and red blood cell folic acid concentrations for assessing folic acid status in populations. Vitamin and Mineral Nutrition Information System. Geneva: World Health Organization; 2015.
27. Grant FK, Martorell R, Flores-Ayala R, Cole CR, Ruth LJ, Ramakrishnan U, Suchdev PS: Comparison of indicators of iron deficiency in Kenyan children. *Am J Clin Nutr*, 95(5):1231-1237.
28. Engle-Stone R, Williams TN, Nankap M, Ndjebayi A, Gimou MM, Oyono Y, Tarini A, Brown KH, Green R: Prevalence of Inherited Hemoglobin Disorders and Relationships with Anaemia and Micronutrient Status among Children in Yaounde and Douala, Cameroon. *Nutrients* 2017, 9(7).
29. Cook JD, Flowers CH, Skikne BS: The quantitative assessment of body iron. *blood* 2003, 101(9):3359-3364.
30. Pfeiffer CM, Cook JD, Mei Z, Cogswell ME, Looker AC, Lacher DA: Evaluation of an automated soluble transferrin receptor (sTfR) assay on the Roche Hitachi analyzer and its comparison to two ELISA assays. *Clin Chim Acta* 2007, 382(1-2):112-116.
31. Wu Q, van Velthoven MH, Chen L, Car J, Rudan D, Saftić V, Zhang YF, Li Y, Scherpbier RW: Improving the intake of nutritious food in children aged 6-23 months in Wuyi County, China – a multi-method approach. *Croatian Medical Journal* 2013, 54(2):157-170.

- 1
  - 2
  - 3
  - 4
  - 5
  - 6
  - 7
  - 8
  - 9
  - 10
  - 11
  - 12
  - 13
  - 14
  - 15
  - 16
  - 17
  - 18
  - 19
  - 20
  - 21
  - 22
  - 23
  - 24
  - 25
  - 26
  - 27
  - 28
  - 29
  - 30
  - 31
  - 32
  - 33
  - 34
  - 35
  - 36
  - 37
  - 38
  - 39
  - 40
  - 41
  - 42
  - 43
  - 44
  - 45
  - 46
  - 47
  - 48
  - 49
  - 50
  - 51
  - 52
  - 53
  - 54
  - 55
  - 56
  - 57
  - 58
  - 59
  - 60
32. Dang S, Yan H, Yamamoto S, Wang X, Zeng L: Feeding practice among younger Tibetan children living at high altitudes. *Eur J Clin Nutr* 2005, 59(9):1022-1029.
33. Xing Y, Yan H, Dang S: Survey on feeding knowledge and behavior of Tibetan infant mothers in rural Lhasa. *Chinese Public Health* 2010, 26(8):945-946.
34. Zhang Y, Feng G, Zhang Y: Survey on feeding and growth of Hui and Tibetan children under 5 years old in Gansu Province *Medicine and Society* 2009, 22(11):37-39.
35. Jonker FA, Boele VMH, Leenstra T, Raymond JWMV, Brabin BJ, Maseko N, Gushu MB: Conventional and novel peripheral blood iron markers compared against bone marrow in Malawian children. *J Clin Pathol* 2014, 67(8):717-723.
36. Gwetu TP, Chhagan MK, Taylor M, Kauchali S, Craib M: Anaemia control and the interpretation of biochemical tests for iron status in children. *BMC Res Notes* 2017, 10(163): 1-9.
37. McLean E, Cogswell M, Egli I, Wojdyla D, de Benoist B: Worldwide prevalence of anaemia, WHO Vitamin and Mineral Nutrition Information System, 1993-2005. *Public Health Nutr* 2009, 12(4):444-454.
38. DeLoughery TG: Microcytic anaemia. *N Engl J Med* 2014, 371(14):1324-1331.
39. DeMaeyer EM, Dallman P, Gurney JM, L.Hallberg, Sood SK, Srikantia SG: Preventing and Controlling Iron Deficiency Anaemia through Primary Health Care--A guide for health administrators and programme managers. In. Geneva, Switzerland: World Health Organization 1989.
40. McDonald SJ, Middleton P, Dowswell T, Morris PS: Effect of timing of umbilical cord clamping of term infants on maternal and neonatal outcomes (Review). *The Cochrane Collaboration* 2014, 9(2):303-397.
41. Chang SY, Chen CM, He W, Wang YY: Analysis on the changes of nutritional status in China - the improvement of complementary feeding among Chinese infants and young children. *Wei Sheng Yan Jiu* 2007(36):19-20.
42. Wang XL, Hojer B, Guo SF, Luo SS, Zhou WY, Wang Y: Stunting and 'overweight' in the WHO Child Growth Standards – malnutrition among children in a poor area of China. *Public Health Nutrition* 2009, 12(11):1991-1998.
43. Chang CM: Fat intake and nutritional status of children in China. *The American Journal of Clinical Nutrition* 2000, 72(5):1368s-1372s.
44. Chen CM, He W, Chang SY: The changes of the attributable factors of child growth. *Wei Sheng Yan Jiu* 2006(35):765-768.
45. Wang XL, Chu KY, Wang Y: Analysis of current situation of breastfeeding and complementary feeding of children aged under 2 years in 105 maternal and child health cooperative project counties. *Chin J Child Health Care* 2000(18):144-146.
46. Huo JS, Sun J, Fang Z, Chang SY, Zhao L, Fu P, Wang J, Huang J, Wang L, Begin F et al: Effect of home-based complementary food fortification on prevalence of anaemia among infants and young children aged 6 to 23 months in poor rural regions of China. *Food and Nutrition Bulletin* 2015, 36(4):405-414.
47. Wang J, Chang SY, Zhao L, Yu W, Zhang J, Man Q, He L, Duan Y, Wang H, Scherpbier R et al: Effectiveness of community-based complementary food supplement (Yingyangbao) distribution in children aged 6-23 months in poor areas in China. *PLoS One* 2017, 12(3):e0174302.
48. Wang Y, Chen C, Wang F, Jia M, Wang K: Effects of nutrient fortified complementary food supplements on anaemia of infants and young children in poor rural of Gansu. *Biomedical and*



- 1  
2  
3 Environmental Sciences 2009, 22(3):194-200.
- 4 49. Zulfiqar AB, Jai KD, Arjumand R, Michelle FG, Neff W, Susan H, Patrick W, Anna L, Robert EB:  
5 Evidence-based interventions for improvement of maternal and child nutrition: what can be done  
6 and at what cost? *Lancet* 2013, 382(9890):452-477.
- 7  
8 50. De-Regil LM, Suchdev PS, Vist GE, Walleser S, Pena-Rosas JP: Home fortification of foods with  
9 multiple micronutrient powders for health and nutrition in children under two years of age  
10 (Review). *Evid Based Child Health* 2013, 8(1):112-201.
- 11  
12 51. Suchdev PS, Ruth LJ, Woodruff BA, Mbakaya C, Mandava U, Flores-Ayala R, Jefferds MED: Selling  
13 Sprinkles micronutrient powder reduces anaemia, iron deficiency, and vitamin A deficiency in  
14 young children in Western Kenya: a cluster-randomized controlled trial. *The American Journal of  
15 Clinical Nutrition* 2012, 95(5):1223-1230.
- 16  
17 52. Jeffrey DF, William AF: Changing AIDS-risk behavior. *Psychological Bulletin* 1992, 111(3):455-474.
- 18  
19 53. Jacobs RJ, Caballero J, Ownby RL, Kane MN: Development of a culturally appropriate computer-  
20 delivered tailored internet-based health literacy intervention for spanish-dominant hispanics  
21 living with HIV. *BMC Medical Informatics and Decision Making* 2014, 14(1):103.
- 22  
23 54. Wu Q, Zhang YF, Chang SY, Wang W, van Velthoven MH, Han HJ, Xing M, Chen L, Du X, Scherpbier  
24 RW: Monitoring and evaluating the adherence to a complementary food supplement (Ying Yang  
25 Bao) among young children in rural Qinghai, China: a mixed methods evaluation study. *J Glob  
26 Health* 2017, 7(1):011101.
- 27  
28 55. Wang J, Chang SY, Zhao L, Yu W, Zhang J, Man Q, He L, Duan Y, Wang H, Scherpbier R et al:  
29 Effectiveness of community-based complementary food supplement (Yingyangbao) distribution  
30 in children aged 6-23 months in poor areas in China. *PLoS One* 2017, 12(3).
- 31  
32 56. Pander T, Pinilla S, Dimitriadis K, Fischer MR: The use of Facebook in medical education--a  
33 literature review. *GMS Z Med Ausbild.* vol. 31; 2014: Doc33.
- 34  
35 57. He C, Wu S, Zhao Y, Li Z, Zhang Y, Le J, Wang L, Wan S, Li C, Li Y et al: Social Media-Promoted  
36 Weight Loss Among an Occupational Population: Cohort Study Using a WeChat Mobile Phone  
37 App-Based Campaign: He C, Wu S, Zhao Y, et al. Social Media-Promoted Weight Loss Among an  
38 Occupational Population: Cohort Study Using a WeChat Mobile Phone App-Based Campaign. *J  
39 Med Internet Res.* 2017;19(10)e357.
- 40  
41 58. Li W, Han LQ, Guo YJ, Sun J: Using WeChat official accounts to improve malaria health literacy  
42 among Chinese expatriates in Niger: an intervention study: Li W, Han LQ, Guo YJ, et al. *Malar J.*  
43 2016;15(1)567.
- 44  
45 59. Jacobs RJ, Lou JQ, Ownby RL, Caballero J: A systematic review of eHealth interventions to improve  
46 health literacy: Jacobs RJ, Lou JQ, Ownby RL, et al. A systematic review of eHealth interventions  
47 to improve health literacy. *Health Informatics J.* 2016;22(2)81-98.
- 48  
49  
50

## 51 Figure legends

### 52 Figure 1 Flowchart of study procedures

### 53 Figure 2 Causes of anaemia

1  
2  
3  
4  
5  
6  
7  
8  
9  
10  
11  
12  
13  
14  
15  
16  
17  
18  
19  
20  
21  
22  
23  
24  
25  
26  
27  
28  
29  
30  
31  
32  
33  
34  
35  
36  
37  
38  
39  
40  
41  
42  
43  
44  
45  
46  
47  
48  
49  
50  
51  
52  
53  
54  
55  
56  
57  
58  
59  
60

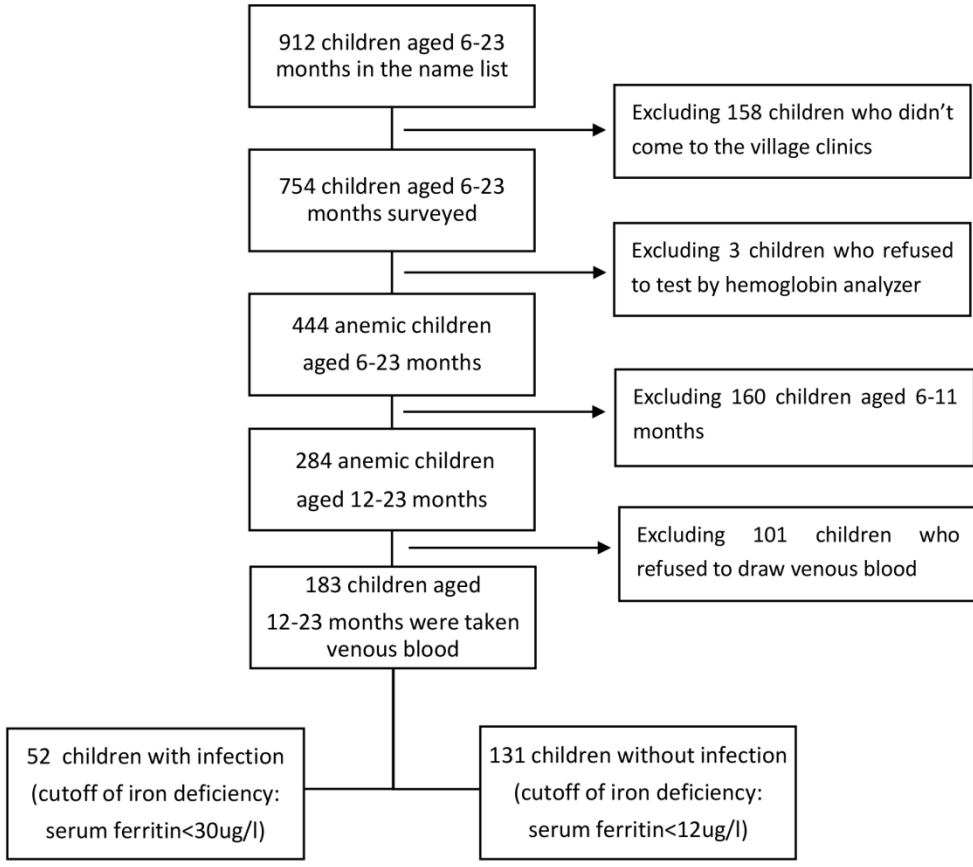

Flowchart of study procedures

159x140mm (300 x 300 DPI)

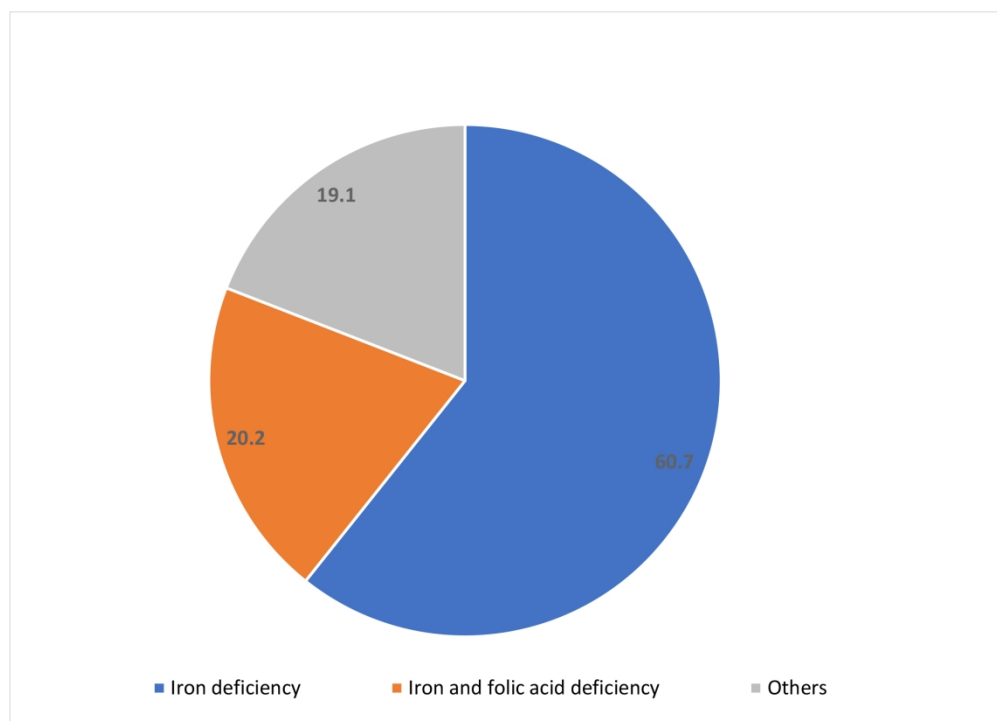

Biological causes of anaemia

178x127mm (300 x 300 DPI)

Supplementary Table 1 Background characteristics of children with and without venous blood drawn

| Characteristic                 | Children with venous<br>blood drawn(N=183) | Children without venous<br>blood drawn (N=101) | <i>p</i> -value |
|--------------------------------|--------------------------------------------|------------------------------------------------|-----------------|
| <b>Children</b>                |                                            |                                                |                 |
| Age, %(n)                      |                                            |                                                | 0.3486          |
| 12-17months                    | 56.3(103)                                  | 50.5(51)                                       |                 |
| 18-23months                    | 43.7(80)                                   | 49.5(50)                                       |                 |
| Sex, %(n)                      |                                            |                                                | 0.9184          |
| Boy                            | 54.1(99)                                   | 45.9(84)                                       |                 |
| Girl                           | 53.5(54)                                   | 46.5(47)                                       |                 |
| <b>Main caregivers, %(n)</b>   |                                            |                                                |                 |
| Mother                         | 40.4(74)                                   | 49.5(50)                                       | 0.3213          |
| Grandparent                    | 53.6(98)                                   | 47.5(48)                                       |                 |
| Father                         | 5.5(10)                                    | 3.0(3)                                         |                 |
| Other                          | 0.6(1)                                     | -                                              |                 |
| <b>Mothers</b>                 |                                            |                                                |                 |
| Age in years (median (Q1, Q3)) | 29(26,32)                                  | 31(28,34)                                      | 0.0511          |
| Nationality, %(n)              |                                            |                                                | 0.6858          |
| Han                            | 68.9(51)                                   | 62.0(31)                                       |                 |
| Tu                             | 24.3(18)                                   | 28.0(14)                                       |                 |
| Tibetan                        | 6.8(5)                                     | 10.0(5)                                        |                 |
| Education, %(n)                |                                            |                                                | 0.2235          |
| Illiterate                     | 8.1(6)                                     | 2.0(1)                                         |                 |
| Primary school                 | 17.6(13)                                   | 26.0(13)                                       |                 |
| Junior high school             | 58.1(43)                                   | 64.0(32)                                       |                 |
| Senior high school or above    | 14.9(11)                                   | 8.0(4)                                         |                 |
| Do not know                    | 1.4(1)                                     | -                                              |                 |
| <b>Grandparents</b>            |                                            |                                                |                 |
| Age in year (median (Q1, Q3))  | 54(50,60)                                  | 54(51,57.5)                                    | 0.6643          |
| Education, %(n)                |                                            |                                                | 0.4168          |
| Illiterate                     | 62.2(61)                                   | 50.0(24)                                       |                 |
| Primary school                 | 20.4(20)                                   | 27.1(13)                                       |                 |
| Junior high school             | 15.3(15)                                   | 18.8(9)                                        |                 |

---

|                               |           |          |               |
|-------------------------------|-----------|----------|---------------|
| Senior high school            | 2.0(2)    | 2.1(1)   |               |
| Do not know                   | -         | 2.1(1)   |               |
| <b>Household income, %(n)</b> |           |          | <b>0.1215</b> |
| Working outside the county    | 91.3(167) | 91.1(92) |               |
| Agriculture-related work      | 7.1(13)   | 3.9(4)   |               |
| Self-employed                 | 1.6(3)    | 3.0(3)   |               |
| Others                        | -         | 2.0(2)   |               |

---

For peer review only

**STROBE 2007 (v4) Statement—Checklist of items that should be included in reports of *cross-sectional studies***

| Section/Topic                | Item # | Recommendation                                                                                                                                                                       | Reported on page # |
|------------------------------|--------|--------------------------------------------------------------------------------------------------------------------------------------------------------------------------------------|--------------------|
| <b>Title and abstract</b>    | 1      | (a) Indicate the study’s design with a commonly used term in the title or the abstract                                                                                               | 1                  |
|                              |        | (b) Provide in the abstract an informative and balanced summary of what was done and what was found                                                                                  | 3-4                |
| <b>Introduction</b>          |        |                                                                                                                                                                                      |                    |
| Background/rationale         | 2      | Explain the scientific background and rationale for the investigation being reported                                                                                                 | 4-6                |
| Objectives                   | 3      | State specific objectives, including any prespecified hypotheses                                                                                                                     | 6                  |
| <b>Methods</b>               |        |                                                                                                                                                                                      |                    |
| Study design                 | 4      | Present key elements of study design early in the paper                                                                                                                              | 6-7                |
| Setting                      | 5      | Describe the setting, locations, and relevant dates, including periods of recruitment, exposure, follow-up, and data collection                                                      | 7                  |
| Participants                 | 6      | (a) Give the eligibility criteria, and the sources and methods of selection of participants                                                                                          | 7                  |
| Variables                    | 7      | Clearly define all outcomes, exposures, predictors, potential confounders, and effect modifiers. Give diagnostic criteria, if applicable                                             | 10-12              |
| Data sources/<br>measurement | 8*     | For each variable of interest, give sources of data and details of methods of assessment (measurement). Describe comparability of assessment methods if there is more than one group | 9-10               |
| Bias                         | 9      | Describe any efforts to address potential sources of bias                                                                                                                            | 8-10               |
| Study size                   | 10     | Explain how the study size was arrived at                                                                                                                                            | 8                  |
| Quantitative variables       | 11     | Explain how quantitative variables were handled in the analyses. If applicable, describe which groupings were chosen and why                                                         | N/A                |
| Statistical methods          | 12     | (a) Describe all statistical methods, including those used to control for confounding                                                                                                | 10-11              |
|                              |        | (b) Describe any methods used to examine subgroups and interactions                                                                                                                  | N/A                |
|                              |        | (c) Explain how missing data were addressed                                                                                                                                          | 10-11              |
|                              |        | (d) If applicable, describe analytical methods taking account of sampling strategy                                                                                                   | 10-11              |
|                              |        | (e) Describe any sensitivity analyses                                                                                                                                                | N/A                |
| <b>Results</b>               |        |                                                                                                                                                                                      |                    |

|                          |     |                                                                                                                                                                                                              |       |
|--------------------------|-----|--------------------------------------------------------------------------------------------------------------------------------------------------------------------------------------------------------------|-------|
| Participants             | 13* | (a) Report numbers of individuals at each stage of study—eg numbers potentially eligible, examined for eligibility, confirmed eligible, included in the study, completing follow-up, and analysed            | 12;27 |
|                          |     | (b) Give reasons for non-participation at each stage                                                                                                                                                         | N/A   |
|                          |     | (c) Consider use of a flow diagram                                                                                                                                                                           | 29    |
| Descriptive data         | 14* | (a) Give characteristics of study participants (eg demographic, clinical, social) and information on exposures and potential confounders                                                                     | 12-13 |
|                          |     | (b) Indicate number of participants with missing data for each variable of interest                                                                                                                          | 29    |
| Outcome data             | 15* | Report numbers of outcome events or summary measures                                                                                                                                                         | 12-18 |
| Main results             | 16  | (a) Give unadjusted estimates and, if applicable, confounder-adjusted estimates and their precision (eg, 95% confidence interval). Make clear which confounders were adjusted for and why they were included | N/A   |
|                          |     | (b) Report category boundaries when continuous variables were categorized                                                                                                                                    | 18    |
|                          |     | (c) If relevant, consider translating estimates of relative risk into absolute risk for a meaningful time period                                                                                             | N/A   |
| Other analyses           | 17  | Report other analyses done—eg analyses of subgroups and interactions, and sensitivity analyses                                                                                                               | N/A   |
| <b>Discussion</b>        |     |                                                                                                                                                                                                              |       |
| Key results              | 18  | Summarise key results with reference to study objectives                                                                                                                                                     | 18    |
| Limitations              | 19  | Discuss limitations of the study, taking into account sources of potential bias or imprecision. Discuss both direction and magnitude of any potential bias                                                   | 4     |
| Interpretation           | 20  | Give a cautious overall interpretation of results considering objectives, limitations, multiplicity of analyses, results from similar studies, and other relevant evidence                                   | 18-21 |
| Generalisability         | 21  | Discuss the generalisability (external validity) of the study results                                                                                                                                        | 23    |
| <b>Other information</b> |     |                                                                                                                                                                                                              |       |
| Funding                  | 22  | Give the source of funding and the role of the funders for the present study and, if applicable, for the original study on which the present article is based                                                | 24    |

\*Give information separately for cases and controls in case-control studies and, if applicable, for exposed and unexposed groups in cohort and cross-sectional studies.

**Note:** An Explanation and Elaboration article discusses each checklist item and gives methodological background and published examples of transparent reporting. The STROBE checklist is best used in conjunction with this article (freely available on the Web sites of PLoS Medicine at <http://www.plosmedicine.org/>, Annals of Internal Medicine at <http://www.annals.org/>, and Epidemiology at <http://www.epidem.com/>). Information on the STROBE Initiative is available at [www.strobe-statement.org](http://www.strobe-statement.org).
