# Supplementary material for: Prevalence and causes of anaemia in children aged 6–23 months in rural Qinghai, China: findings from a cross-sectional study
Source: PubMed Central journal article supplement — BMJ Open. 2019 Sep 8;9(9):e031021. doi: 10.1136/bmjopen-2019-031021 (PMC6738674; doi:10.1136/bmjopen-2019-031021), 2019-09-08
Supplement: bmjopen-2019-031021supp001.pdf [file bmjopen-2019-031021supp001.pdf]

Supplementary Table 1 Background characteristics of children with and without venous blood drawn

| Characteristic                 | Children with venous<br>blood drawn(N=183) | Children without venous<br>blood drawn (N=101) | p-value |
|--------------------------------|--------------------------------------------|------------------------------------------------|---------|
| <b>Children</b>                |                                            |                                                |         |
| Age, %(n)                      |                                            |                                                | 0.3486  |
| 12-17months                    | 56.3(103)                                  | 50.5(51)                                       |         |
| 18-23months                    | 43.7(80)                                   | 49.5(50)                                       |         |
| Sex, %(n)                      |                                            |                                                | 0.9184  |
| Boy                            | 54.1(99)                                   | 45.9(84)                                       |         |
| Girl                           | 53.5(54)                                   | 46.5(47)                                       |         |
| <b>Main caregivers, %(n)</b>   |                                            |                                                | 0.3213  |
| Mother                         | 40.4(74)                                   | 49.5(50)                                       |         |
| Grandparent                    | 53.6(98)                                   | 47.5(48)                                       |         |
| Father                         | 5.5(10)                                    | 3.0(3)                                         |         |
| Other                          | 0.6(1)                                     | -                                              |         |
| <b>Mothers</b>                 |                                            |                                                |         |
| Age in years (median (Q1, Q3)) | 29(26,32)                                  | 31(28,34)                                      | 0.0511  |
| Nationality, %(n)              |                                            |                                                | 0.6858  |
| Han                            | 68.9(51)                                   | 62.0(31)                                       |         |
| Tu                             | 24.3(18)                                   | 28.0(14)                                       |         |
| Tibetan                        | 6.8(5)                                     | 10.0(5)                                        |         |
| Education, %(n)                |                                            |                                                | 0.2235  |
| Illiterate                     | 8.1(6)                                     | 2.0(1)                                         |         |
| Primary school                 | 17.6(13)                                   | 26.0(13)                                       |         |
| Junior high school             | 58.1(43)                                   | 64.0(32)                                       |         |
| Senior high school or above    | 14.9(11)                                   | 8.0(4)                                         |         |
| Do not know                    | 1.4(1)                                     | -                                              |         |
| <b>Grandparents</b>            |                                            |                                                |         |
| Age in year (median (Q1, Q3))  | 54(50,60)                                  | 54(51,57.5)                                    | 0.6643  |
| Education, %(n)                |                                            |                                                | 0.4168  |
| Illiterate                     | 62.2(61)                                   | 50.0(24)                                       |         |
| Primary school                 | 20.4(20)                                   | 27.1(13)                                       |         |
| Junior high school             | 15.3(15)                                   | 18.8(9)                                        |         |

---

|                               |           |          |               |
|-------------------------------|-----------|----------|---------------|
| Senior high school            | 2.0(2)    | 2.1(1)   |               |
| Do not know                   | -         | 2.1(1)   |               |
| <b>Household income, %(n)</b> |           |          | <b>0.1215</b> |
| Working outside the county    | 91.3(167) | 91.1(92) |               |
| Agriculture-related work      | 7.1(13)   | 3.9(4)   |               |
| Self-employed                 | 1.6(3)    | 3.0(3)   |               |
| Others                        | -         | 2.0(2)   |               |

---
